# Supplementary material for: Rational and controllable syntheses of variants of modified N-confused N-fused porphodimethenes and a porphotrimethene with adaptive properties
Source: Royal Society of Chemistry journal article supplement (doi:10.1039/d4dt00770k), 2024-01-01
Supplement: d4dt00770k1.pdf [file d4dt00770k1.pdf]

*Electronic Supplementary Materials for*

**Rational and Controllable Syntheses of variants of modified N-confused N-fused Porphodimethenes and Porphotrimethene with Adaptive properties**

Manik Jana,<sup>a</sup> Sumit Sahoo,<sup>a</sup> Sanjay Kottekad,<sup>b</sup> Dandamudi Usharani<sup>\*b, c</sup> and Harapriya Rath<sup>\*a</sup>

<sup>a</sup> School of Chemical Sciences, Indian Association for The Cultivation of Science, 2A/2B Raja S. C. Mullick Road, Jadavpur, Kolkata 700 032, India, E-mail: [ichr@iacs.res.in](mailto:ichr@iacs.res.in)

<sup>b</sup> Department of Food Safety and Analytical Quality Control Laboratory, CSIR-Central Food Technological Research Institute, Mysuru 570020 Karnataka, India, E-mail: [ushad@cftri.res.in](mailto:ushad@cftri.res.in)

<sup>c</sup> Academy of Scientific and Innovative Research (AcSIR), CSIR-HRDC, Ghaziabad, Uttar Pradesh, India

**Table of Contents**

|                             |         |
|-----------------------------|---------|
| Materials and Methods       | S2-S5   |
| General Synthetic Procedure | S6-S9   |
| Spectroscopic Data          | S10-S46 |
| X-ray crystal Data          | S47-S48 |
| Theoretical Calculations    | S49-S61 |
| X,Y,Z Coordinates           | S62-S73 |

## **Materials and Methods:**

1.1 Electronic absorption spectra were measured with a PerkinElmer Lambda 950 UV-visible-NIR spectrophotometer.  $^1\text{H}$  and  $^{13}\text{C}$  NMR spectra were recorded on a Bruker AVIII 600 MHz spectrometer, Bruker AVIII 400 MHz, Bruker DPX-300 MHz spectrometer (operating at 300.132/400.20/600.13 MHz for  $^1\text{H}$  and 75.47/100.64/150.05 MHz for  $^{13}\text{C}$ ) using the residual solvents as the internal references for  $^1\text{H}$  [ $(\text{CHCl}_3$  ( $\delta = 7.26$  ppm),  $\text{CH}_2\text{Cl}_2$  ( $\delta = 5.32$  ppm)). ESI HR-MS data were recorded using Waters QTOF Micro YA263 spectrometer. Fluorescence emission spectra were examined in the Fluoromax-3 instrument (Horiba Jobin Yvon) using a quartz cell of 10 nm path length and slit width of 5 nm for both excitation and emission. All solvents and chemicals were of reagent grade quality, obtained commercially and used without further purification except as noted. For spectral measurements, anhydrous dichloromethane was obtained by refluxing and distillation over  $\text{CaH}_2$ . Dry THF was obtained by refluxing and distillation over pressed Sodium metal. Thin layer chromatography (TLC) was carried out on alumina sheets coated with silica gel 60 F<sub>254</sub> (Merck 5554) and gravity column chromatography were performed using Merck Silica Gel 230-400 mesh. Aluminum Oxide (Basic) grade II was purchased from Sigma Aldrich.

### **1.2 X-Ray structure determination.**

A specimen of  $\text{C}_{99}\text{H}_{68}\text{Cl}_2\text{F}_8\text{N}_6\text{S}_4$ , approximate dimensions 0.100 mm x 0.100 mm x 0.100 mm, was used for the X-ray crystallographic analysis. The X-ray intensity data were measured ( $\lambda = 0.71073$  Å). The total exposure time was 2.42 hours. The frames were integrated with the Bruker SAINT software package using a narrow-frame algorithm. The integration of the data using a triclinic unit cell yielded a total of 53660 reflections to a maximum  $\theta$  angle of  $26.45^\circ$  (0.80 Å resolution), of which 18771 were independent (average redundancy 2.859, completeness = 99.1%,  $R_{\text{int}} = 16.23\%$ ,  $R_{\text{sig}} = 24.49\%$ ) and 5816 (30.98%) were greater than  $2\sigma(F^2)$ . The final cell constants of  $a = 15.72(3)$  Å,  $b = 16.498(18)$  Å,  $c = 18.03(2)$  Å,  $\alpha = 94.031(19)^\circ$ ,  $\beta = 100.44(4)^\circ$ ,  $\gamma = 90.63(4)^\circ$ , volume = 4586. (11) Å<sup>3</sup>, are based upon the refinement of the XYZ-centroids of 4152 reflections above  $20\sigma(I)$ . The calculated minimum and maximum transmission coefficients (based on crystal size) are 0.9780 and 0.9780. The final anisotropic full-matrix least-squares refinement on  $F^2$  with 1078 variables converged at  $R1 = 9.00\%$ , for the observed data and  $wR2 = 28.39\%$  for all data. The goodness-of-fit was 0.920. The largest peak in the final difference electron density synthesis was  $0.414\text{ e}/\text{Å}^3$  and the largest hole was  $-0.349\text{ e}/\text{Å}^3$  with an RMS deviation of  $0.068\text{ e}/\text{Å}^3$ . On the basis of the final model, the calculated density was  $1.226\text{ g}/\text{cm}^3$  and  $F(000)$ , 1748 e<sup>-</sup>.

### **1.3 Determination of Association Constant by UV-vis Absorption Spectroscopic titration method:**

For UV-vis titrations, stock solution of **10-12** were prepared in  $\text{CHCl}_3$ . The solution of the guest was also prepared in  $\text{CHCl}_3$ . The spectra of these solutions were recorded by means of UV-vis absorption methods. Binding constant was calculated according to the Benesi-Hildebrand equation.  $K_a$  was calculated following the equation stated below.

$$1/(A-A_0) = 1/\{K_a(A_{\max} - A_0) [G]_n\} + 1/[A_{\max} - A_0]$$

Here  $A_0$  is the absorbance of receptor in the absence of guest,  $A$  is the absorbance recorded in the presence of added guest,  $A_{\max}$  is absorbance in presence of added  $[G]_{\max}$  and  $K_a$  is the association constant ( $M^{-1}$ ). The association constant ( $K_a$ ) could be determined from the slope of the straight line of the plot of  $1/(A-A_0)$  against  $1/[G]_n$ .

#### 1.4 Job's plot:

The stoichiometry between **10-12** and analyte was evaluated by Job's plot method. A solution of **10-12** and guest (**G**) of same concentration were mixed in different proportions keeping a final volume of 2 mL. The related compositions for **10/11/12: G** (v/v) were 2:0, 1.8: 0.2, 1.6: 0.4, 1.4:0.6, 1.2:0.8, 1.0:1.0, 0.8:1.2, 0.6:1.4, 0.4:1.6, 0.2:1.8. The solutions thus prepared were used as such to record their absorption spectra. The mole fraction of analyte *i.e.*, ( $X_M$ ) was calculated using the following equation ( $X_M$ ) =  $[G]/[10 \text{ or } 11 \text{ or } 12] + [G]$ . The mole fraction of analytes ( $X_M$ ) was plotted against absorbance to obtain Job's plot.<sup>S1</sup> The mole fraction at which absorbance intensity appeared to be minimum was taken as the stoichiometry of their interaction.

#### 1.5 Theoretical Calculation

Based on the X-ray crystal structure of **10**, the geometries for **11** and **12** were modelled. All these macrocycles were fully optimized at the DFT level using B3LYP<sup>S2</sup> with 6-31G (d, p) basis set.<sup>S3</sup> Further fully optimized stationary points were characterized by harmonic analysis to ensure that all the structures are minima on the potential energy surface. Also, the deprotonated  $[10]^-$ ,  $[12]^-$  and with  $Bu_4N^+$  counter ions  $[10 \cdot TBA^+]$ ,  $[12 \cdot TBA^+]$  and anion bound complexes of **11** with fluoride and acetate ( $[11-F]^-$ ,  $[11-OAc]^-$ ,  $[11-TBAF]$  and  $[11-TBOAc]$ ) were optimized with same basis set and ascertained the frequencies to be minima. Also, employed counter poise method<sup>S4</sup> for basis set superimposition error for obtaining binding energies for anion bound complexes. Over the years, polarized continuum model (PCM)<sup>S5</sup> has been reported to be the most successful and cost-effective model to examine the solvent effect. We have used dichloromethane as solvent. Further, the time dependent density functional theory (TD-DFT)<sup>S6</sup> has been used to compute the electronic absorption spectra, singlet vertical excitation energies and oscillator strengths on the ground state optimized geometries of **10,11** and **12**. Further, predicted <sup>1</sup>H NMR Nuclear Independent Chemical Shifts (NICS) values<sup>7a</sup> with gauge independent atomic orbital (GIAO) method<sup>7b, c</sup> were obtained at the same level of theory with tetramethylsilane as standard reference. All computations were carried out with Gaussian 16 program package.<sup>S8</sup> Electronic structure, excitation analysis was performed using chemcraft, and Multiwfn programs.<sup>S9</sup>

#### References:

S1 P. Job, *Ann. Chim. Appl.*, 1928, **9**, 113–203.

S2 (a) A. D. Becke, *J. Chem. Phys.*, 1993, **98**, 1372–1377; (b) A. D. Becke, *J. Chem. Phys.*, 1992, **96**, 2155–2160; (c) C. Lee, W. Yang and R. G. Parr, *Physical review B.*, 1988, **37**, 785–789.

S3 (a) P. J. Hay and W. R. Wadt, *J. Chem. Phys.*, 1985, **82**, 270–283; (b) W. R. Wadt and P. J. Hay, *J. Chem. Phys.*, 1985, **82**, 284–298; (c) T. H. Dunning and P. J. Hay, Gaussian basis sets for molecular calculations. *In Methods of electronic structure theory*. Springer: 1977, 1–27.

S4 S. F. Boys and F. Bernardi, *Mol Phys.*, 1970, **19**, 553–566.

S5 (a) S. Miertus and J. Tomasi, *Chem. Phys.*, 1982, **65**, 239–245; (b) M. Cossi and V. Barone, *Chem. Phys.*, 2000, **112**, 2427–2435.

S6 (a) C. Adamo and D. Jacquemin, *Chem. Soc. Rev.*, 2013, **42**, 845–856; (b) G. Scalmani, M. J. Frisch, B. Mennucci, J. Tomasi, R. Cammi and V. Barone, *J. Chem. Phys.*, 2006, **124**, 1–15.

S7 (a) P. v. R. Schleyer, C. Maerker, A. Dransfeld, H. Jiao and N. J. R. van Eikema Hommes, *J. Am. Chem. Soc.*, 1996, **118**, 6317–6318; (b) K. Wolinski, J. F. Hinton and P. Pulay, *J. Am. Chem. Soc.*, 1990, **112**, 8251–8260; (c) F. London, *J. phys. Radium.*, 1937, **8**, 397–409.

S8 M. J. Frisch, G. W. Trucks, H. B. Schlegel, G. E. Scuseria, M. A. Robb, J. R. Cheeseman, G. Scalmani, V. Barone, G. A. Petersson, H. Nakatsuji, X. Li, M. Caricato, A. V. Marenich, J. Bloino, B. G. Janesko, R. Gomperts, B. Mennucci, H. P. Hratchian, J. V. Ortiz, A. F. Izmaylov, J. L. Sonnenberg, D. Williams-Young, F. Ding, F. Lipparini, F. Egidi, J. Goings, B. Peng, A. Petrone, T. Henderson, D. Ranasinghe, V. G. Zakrzewski, J. Gao, N. Rega, G. Zheng, W. Liang, M. Hada, M. Ehara, K. Toyota, R. Fukuda, J. Hasegawa, M. Ishida, T. Nakajima, Y. Honda, O. Kitao, H. Nakai, T. Vreven, K. Throssell, Jr. J. A. Montgomery, J. E. Peralta, F. Ogliaro, M. J. Bearpark, J. J. Heyd, E. N. Brothers, K. N. Kudin, V. N. Staroverov, T. A. Keith, R. Kobayashi, J. Normand, K. Raghavachari, A. P. Rendell, J. C. Burant, S. S. Iyengar, J. Tomasi, M. Cossi, J. M. Millam, M. Klene, C. Adamo, R. Cammi, J. W. Ochterski, R. L. Martin, K. Morokuma, O. Farkas, J. B. Foresman and D. J. Fox, *Gaussian 16 Rev. C.01*, Wallingford, CT, 2016.

S9 (a) Chemcraft - graphical software for visualization of quantum chemistry computations. Version 1.8, build 654. <https://www.chemcraftprog.com>; (b) T. Lu and F. Chen, *J. Comput. Chem.*; 2012, **33**, 580–592; (c) T. Lu and Q. Chen, *Theor. Chem. Acc.*, 2020, **139**, 25.

S10 H. Rath, A. Mallick, T. Ghosh and A. Kalita, *Chem. Commun.*, 2014, **50**, 9094–9096.

S11 (a) N. Halder, M. Sangeetha, D. Usharani and H. Rath, *J. Org. Chem.*, **2020**, **85**, 2059–2067; (b) N. Halder, M. Sangeetha, D. Usharani and H. Rath, *J. Org. Chem.*, **2021**, **86**, 8015–8026.

S12 B. Chakraborty, S. Sahoo, R. Naryanasamy, D. Usharani and H. Rath, *Dalton Trans.* 2021, **50**, 14421–14431.



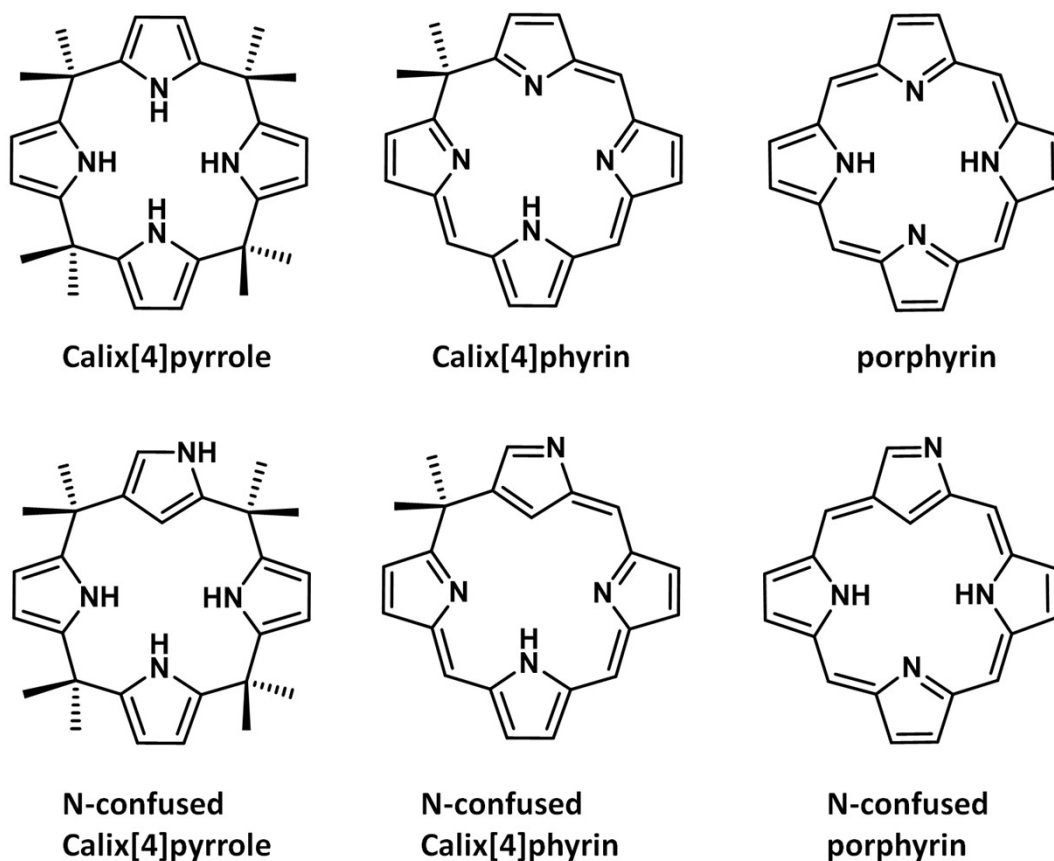

**Chart S1.** Structural relationship between Calixpyrrole- -calixphyrin -porphyrin

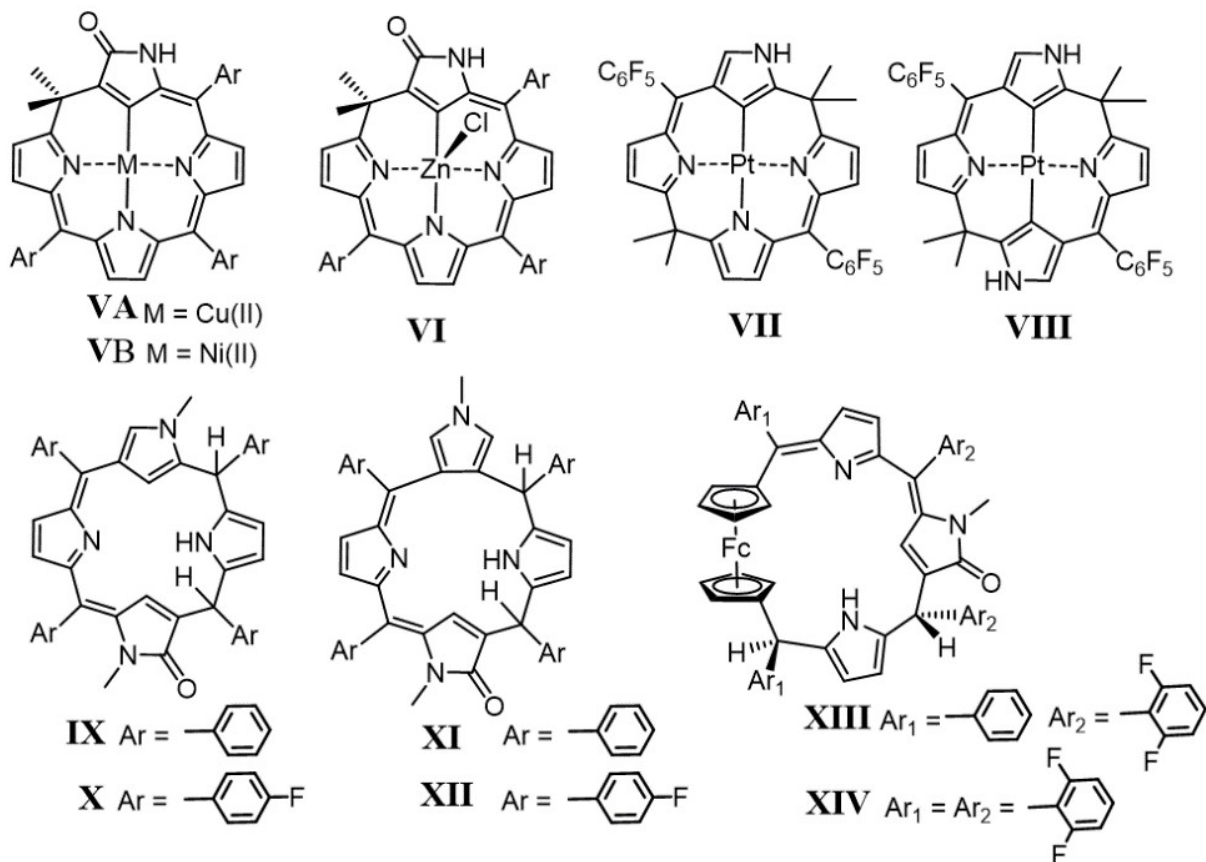

**Chart S2.** Literature known N-confused calixphyrins

## 2.0 Synthesis:

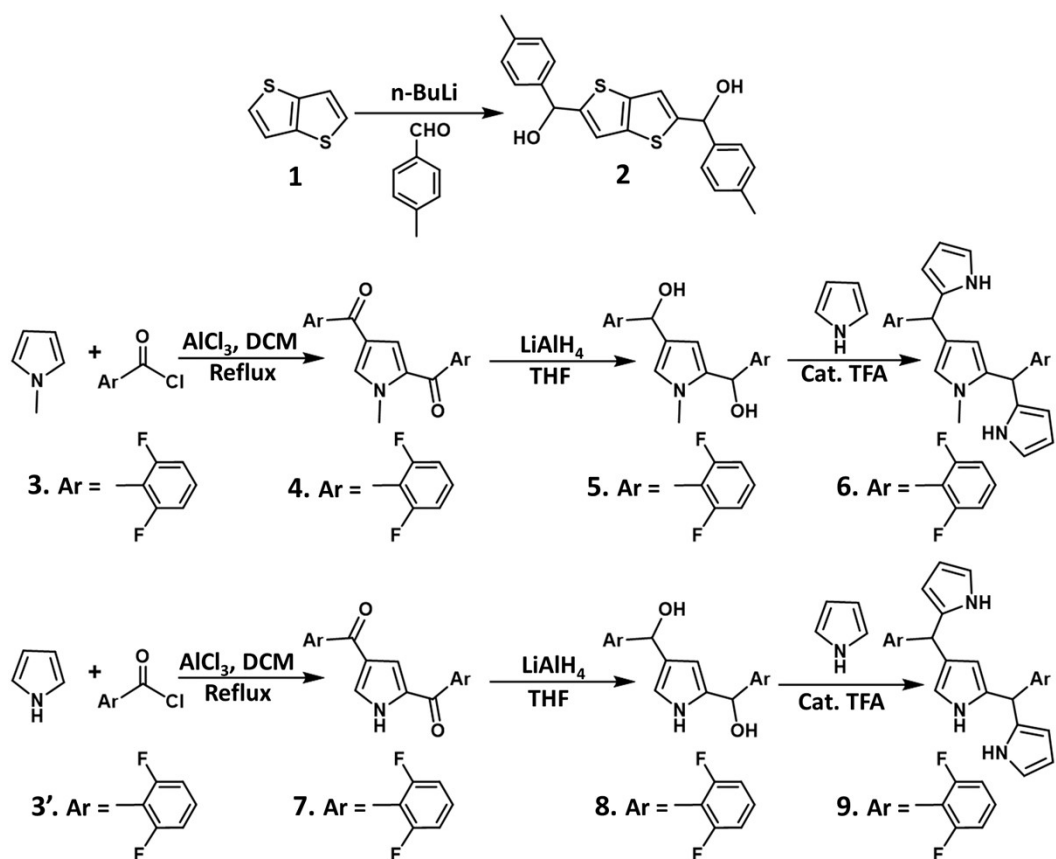

**Scheme S1.** Synthesis of all precursors **2**,<sup>S10</sup> **6**,<sup>S11</sup> and **9**<sup>S12</sup> used for the macrocycles reported in the manuscript

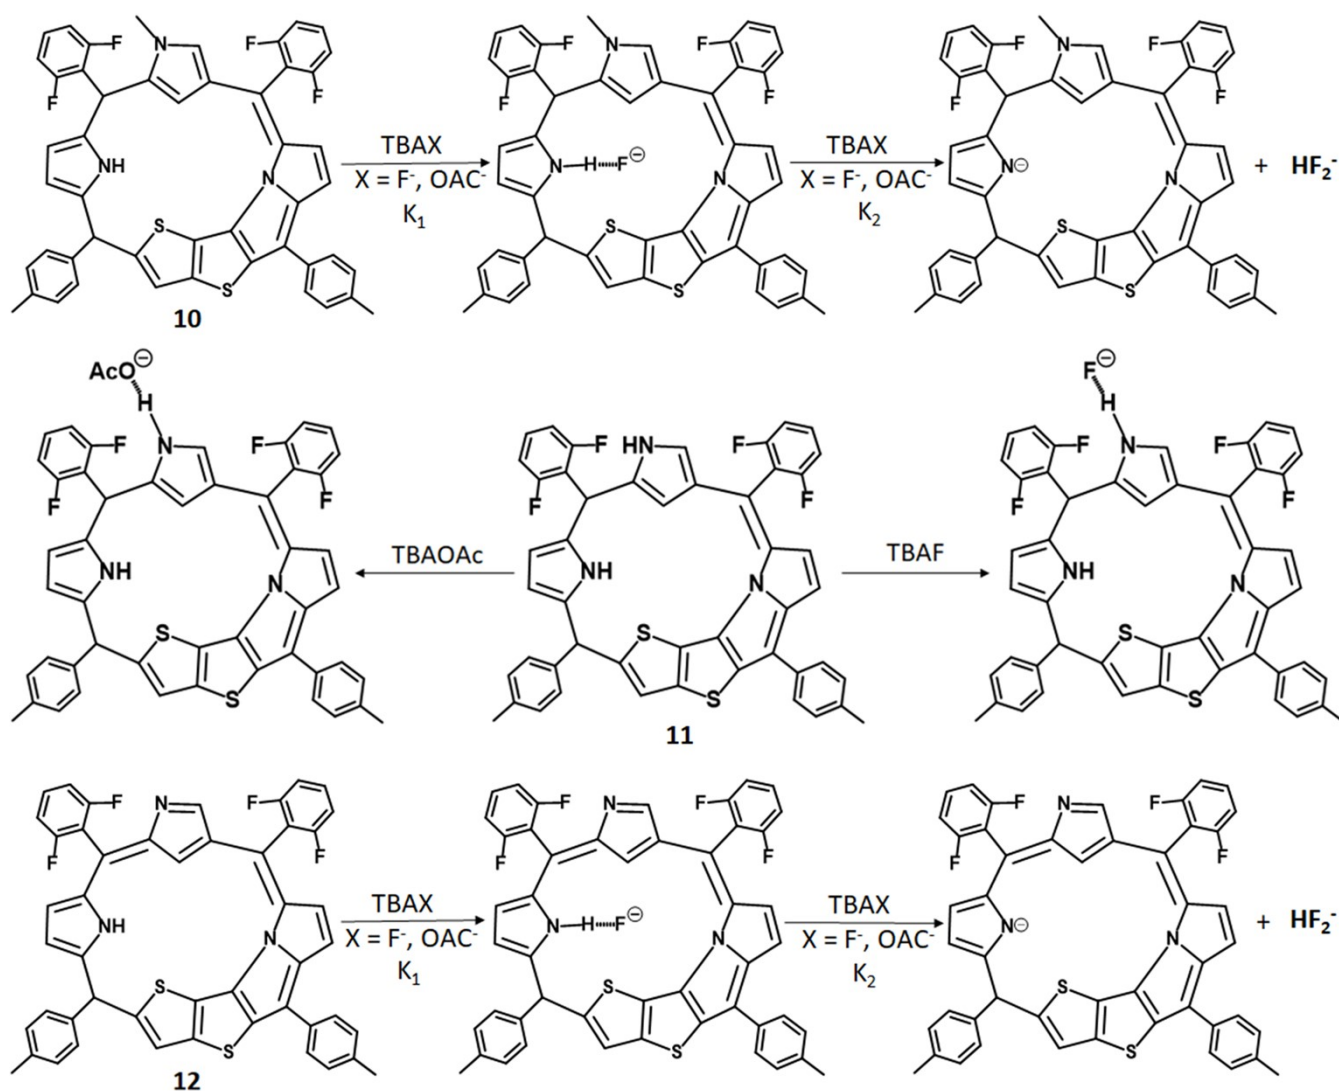

**Scheme S2.** Calixpyrins **10-12** as anion receptors [anion-receptor association (deprotonation)]

Synthesis of **10**: Tripyrrane **6** (0.463 g, 1 mmol) and diol **2** (0.380 g, 1 mmol) were taken in a round bottom flask, to it 740 mL of dry DCM was added and stirred for 15 minutes under nitrogen atmosphere to get a clear solution. After that *p*-Toluenesulfonic acid (0.035 g, 0.185 mmol) was added to the reaction mixture and stirred for 90 minutes under dark condition. After that, *p*-chloranil (0.368 g, 1.5 mmol) was added and the resulting mixture was refluxed for 90 minutes in open air. After complete removal of solvent from reaction mixture by rotary evaporator, the compound was filtered through a short pad of basic alumina column. The crude mixture was purified by silica gel (200-400 mesh) column chromatography using 80% dichloromethane/hexane as eluent. The red colored **10** collected from column was evaporated and recrystallized from CH<sub>2</sub>Cl<sub>2</sub>/Hexane yielding **10** as red crystalline solid.

[**10**] Yield. ~240 mg (~30%). Mp > 350°C. R<sub>f</sub> = 0.4 (C<sub>6</sub>H<sub>14</sub>/CH<sub>2</sub>Cl<sub>2</sub> = 80:20). HRMS (ESI-TOF) *m/z* calc. for C<sub>49</sub>H<sub>33</sub>F<sub>4</sub>N<sub>3</sub>S<sub>2</sub> [M]<sup>+</sup>, 803.2052; found, 803.2050. Elemental analysis Calc. for C<sub>49</sub>H<sub>33</sub>F<sub>4</sub>N<sub>3</sub>S<sub>2</sub>: C, 73.21; H, 4.14; N, 5.23. Found: C, 73.68; H, 4.21; N, 5.18. UV-vis (CH<sub>2</sub>Cl<sub>2</sub>, λ [nm], (ε [M<sup>-1</sup>cm<sup>-1</sup> × 10<sup>4</sup>]), 298K): 330 (2.53), 442 (1.15), 515 (0.84). <sup>1</sup>H NMR (CDCl<sub>3</sub>, 400 MHz): δ 8.54 (s, 1H), 7.60 (d, *J* = 7.9 Hz, 2H), 7.28 (s, 1H), 7.23 – 7.15 (m, 3H), 7.14 (s, 1H), 7.07 (d, *J* = 8.0 Hz, 2H), 6.94 – 6.86 (m, 5H), 6.80 (t, *J* =

8.6 Hz, 1H), 6.68 (s, 1H), 6.12 (br, 2H), 6.06 (br, 1H), 6.05 (br, 1H), 5.78 (br, 1H), 5.76 (s, 1H, *meso*-CH), 5.7 (s, 1H, *meso*-CH), 3.05 (s, 3H, N-Me), 2.40 (s, 3H, Tol-Me), 2.30 (s, 3H, Tol-Me).  $^{13}\text{C}$   $\{^1\text{H}\}$  NMR ( $\text{CDCl}_3$ , 101 MHz):  $\delta$  162.54, 160.09, 160.0, 151.02, 141.83, 139.33, 136.98, 136.44, 135.94, 135.81, 134.56, 132.54, 131.50, 129.83, 129.65, 129.44, 129.24, 128.90, 128.79, 128.52, 128.22, 127.69, 126.51, 126.40, 126.25, 125.83, 120.93, 119.79, 118.54, 117.52, 115.75, 112.81, 112.38, 112.35, 112.13, 112.10, 111.68, 111.59, 111.46, 111.40, 109.65, 109.59, 109.31, 107.19, 46.85, 34.42, 33.00, 21.38, 21.10.

Synthesis of **11**: Tripyrrane **9** (0.449 g, 1 mmol) and diol **2** (0.380 g, 1 mmol) were taken in a round bottom flask, to it 740 mL of dry DCM was added and stirred for 15 minutes under nitrogen atmosphere to get a clear solution. After that *p*-Toluenesulfonic acid (0.035 g, 0.185 mmol) was added to the reaction mixture and stirred for 90 minutes under dark condition. After that, *p*-chloranil (0.368 g, 1.5 mmol) was added and the resulting mixture was refluxed for 90 minutes in open air. After complete removal of solvent from reaction mixture by rotary evaporator, the compound was filtered through a short pad of basic alumina column. The crude mixture was purified by silica gel (200-400 mesh) column chromatography using dichloromethane/hexane as eluent. The red colored **11** collected from column were evaporated and recrystallized from  $\text{CH}_2\text{Cl}_2$ /Hexane yielding **11** as red crystalline solid.

[**11**] Yield. ~198 mg (~25%), Mp > 350°C.  $R_f$  = 0.3 (EtOAc/ $\text{CH}_2\text{Cl}_2$  = 1:9). HRMS (ESI-TOF)  $m/z$  calc. for  $\text{C}_{48}\text{H}_{31}\text{F}_4\text{N}_3\text{S}_2$   $[\text{M}]^+$ , 789.1896; found, 789.1895. Elemental analysis Calc. for  $\text{C}_{48}\text{H}_{31}\text{F}_4\text{N}_3\text{S}_2$ : C, 72.99; H, 3.96; N, 5.32. Found: C, 73.11; H, 4.12; N, 5.29. UV-vis ( $\text{CH}_2\text{Cl}_2$ ,  $\lambda$  [nm], ( $\epsilon$  [ $\text{M}^{-1}\text{cm}^{-1} \times 10^4$ ]), 298K): 333 (1.01), 455 (0.48), 541 (0.32). [**11**]  $^1\text{H}$  NMR ( $\text{CDCl}_3$ , 600 MHz):  $\delta$  8.63 (s, 1H), 8.46 (s, 1H), 7.58 (d,  $J$  = 7.9 Hz, 2H), 7.38 – 7.30 (m, 4H), 7.18 (s, 1H), 7.12 (d,  $J$  = 7.7 Hz, 2H), 7.09 (s, 1H), 7.02 (br, 2H), 6.93 (br, 3H), 6.87 (d,  $J$  = 5.9 Hz, 1H), 6.84 (s, 1H), 6.06 (d,  $J$  = 5.4 Hz, 1H), 6.04 (s, 1H), 5.92 (br, 1H), 5.73 (s, 1H, *meso*-CH), 5.66 (s, 1H, *meso*-CH), 5.34 (br, 1H), 2.42 (s, 3H, Tol-Me), 2.35 (s, 3H, Tol-Me).  $^{13}\text{C}$   $\{^1\text{H}\}$  NMR ( $\text{CDCl}_3$ , 151 MHz):  $\delta$  160.34, 153.50, 141.39, 138.71, 137.81, 137.35, 136.66, 136.57, 134.98, 132.71, 130.90, 130.29, 130.23, 129.91, 129.37, 129.32, 129.13, 128.96, 128.67, 128.58, 128.50, 128.41, 128.33, 128.27, 126.58, 126.25, 124.97, 122.42, 118.92, 117.99, 117.93, 116.50, 114.60, 114.21, 112.20, 112.03, 112.02, 111.89, 111.73, 111.57, 108.70, 108.62, 105.93, 104.19, 46.54, 33.30, 21.42, 21.22.

Synthesis of **12**: **11** (0.078 g, 1 mmol) was taken in a round bottom flask, to it 10 mL of dry  $\text{CH}_2\text{Cl}_2$  and *p*-chloranil (0.245 g, 1 mmol) [or DDQ, 0.272 g, 1mmol] was added and stirred under reflux for 1 hour in air. The reaction mixture was evaporated in a rotary evaporator and was purified by silica gel column chromatography followed by recrystallization from  $\text{CH}_2\text{Cl}_2$ /Hexane to obtain compounds **12** as air stable brownish black solid Yield. ~71 mg (~90%).

[**12**] Yield. ~71 mg (~90%), Mp > 350°C.  $R_f$  = 0.4 ( $\text{C}_6\text{H}_{14}$ / $\text{CH}_2\text{Cl}_2$  = 20:80). HRMS (ESI-TOF)  $m/z$  calc. for  $\text{C}_{48}\text{H}_{30}\text{F}_4\text{N}_3\text{S}_2$   $[\text{M}+\text{H}]^+$ , 788.1817; found, 788.1818. Elemental analysis Calc. for  $\text{C}_{48}\text{H}_{29}\text{F}_4\text{N}_3\text{S}_2$ : C, 73.17; H, 3.71; N, 5.33. Found: C, 73.78; H, 3.87; N, 5.29. UV-vis ( $\text{CH}_2\text{Cl}_2$ ,  $\lambda$  [nm], ( $\epsilon$  [ $\text{M}^{-1}\text{cm}^{-1} \times 10^4$ ]), 298K): 333 (0.80), 445 (1.26), 637 (0.16).  $^1\text{H}$  NMR (600 MHz, Chloroform-*d*)  $\delta$  8.23 (s, 1H), 7.56 (d,  $J$  = 8.1 Hz, 1H), 7.38 (d,  $J$  = 6.6 Hz, 4H), 7.25-7.19 (m, 4H), 7.16 (s, 1H), 6.94 (t,  $J$  = 8.5 Hz, 3H), 6.89 (t,  $J$  = 8.0 Hz,

2H), 6.75 (d,  $J = 6.0$  Hz, 1H), 6.53 (br, 1H), 5.95 (br, 2H), 5.87 (s, 1H), 5.85 (s, 1H), 5.68 (s, 1H, *meso*-CH), 2.41 (s, 3H, Tol-Me), 2.40 (s, 3H, Tol-Me).  $^{13}\text{C}$   $\{^1\text{H}\}$  NMR ( $\text{CDCl}_3$ , 151 MHz):  $\delta$  167.48, 161.81, 161.02, 159.31, 157.15, 152.80, 149.52, 147.21, 144.69, 143.19, 142.33, 140.22, 139.85, 139.39, 138.28, 138.15, 137.97, 137.25, 135.33, 130.93, 130.05, 129.56, 129.46, 129.12, 128.66, 128.14, 128.07, 124.75, 124.60, 124.29, 124.12, 122.30, 121.88, 121.71, 120.47, 119.23, 114.21, 111.82, 111.79, 111.68, 111.65, 111.18, 111.03, 110.18, 95.76, 47.86, 21.44, 21.26.

### 3. Supplementary Data:

#### 3.1 Mass Spectra

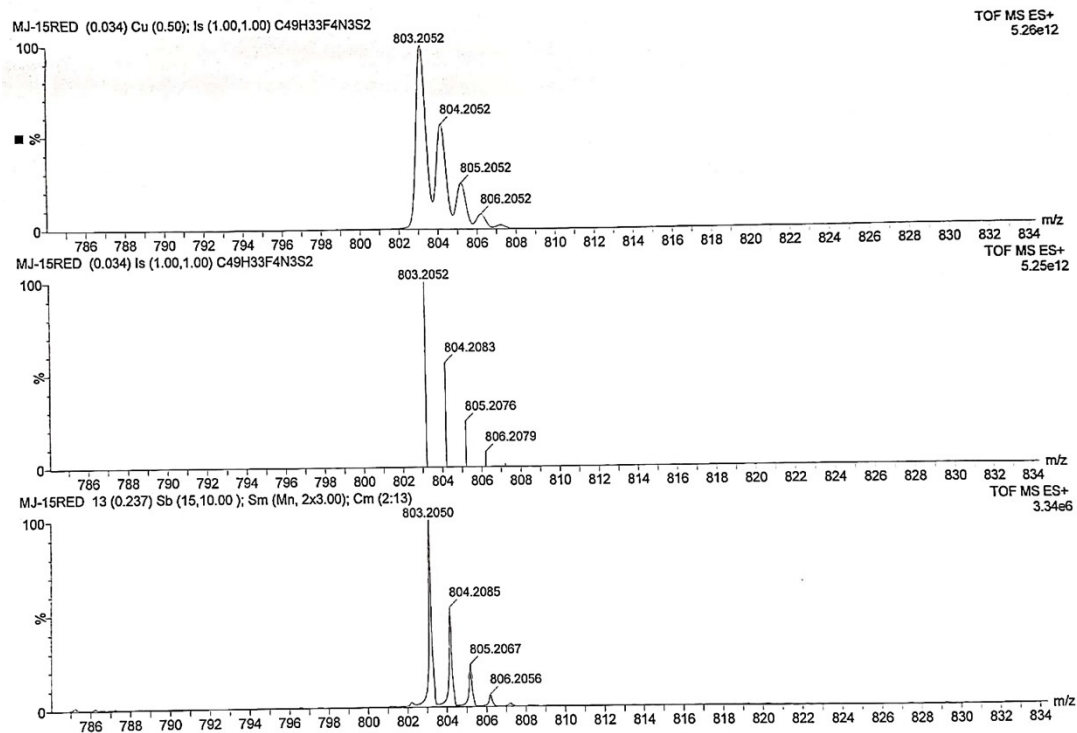

Fig. S1 HRMS Spectra of 10.

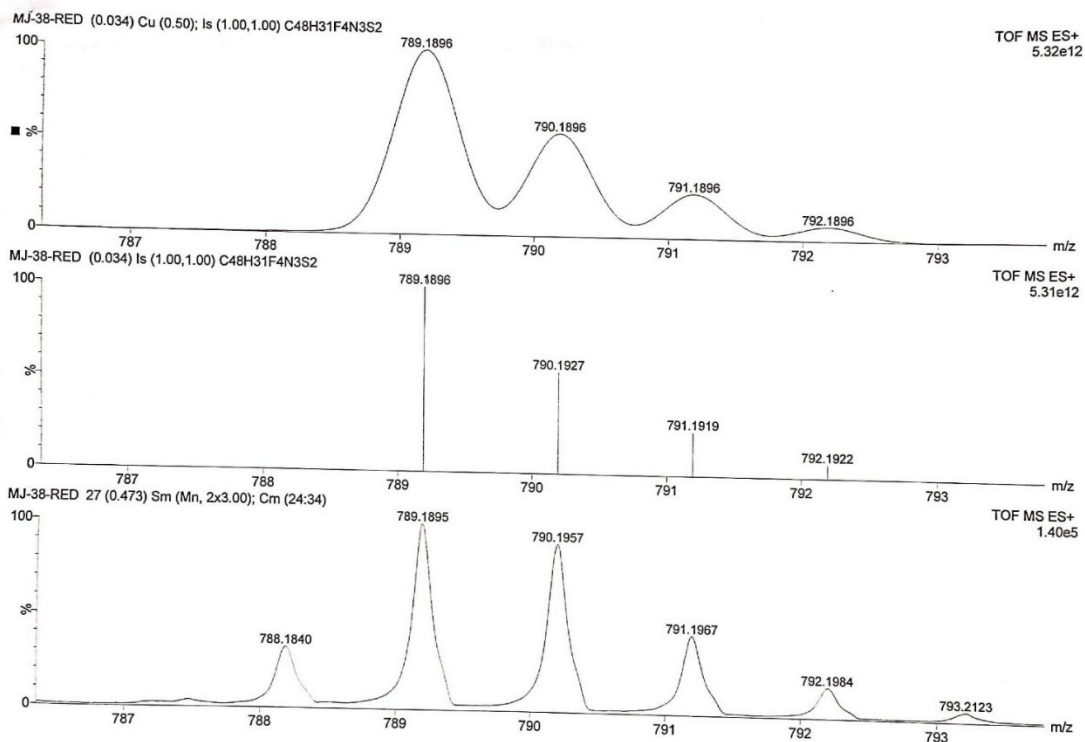

Fig. S2 HRMS Spectra of 11.

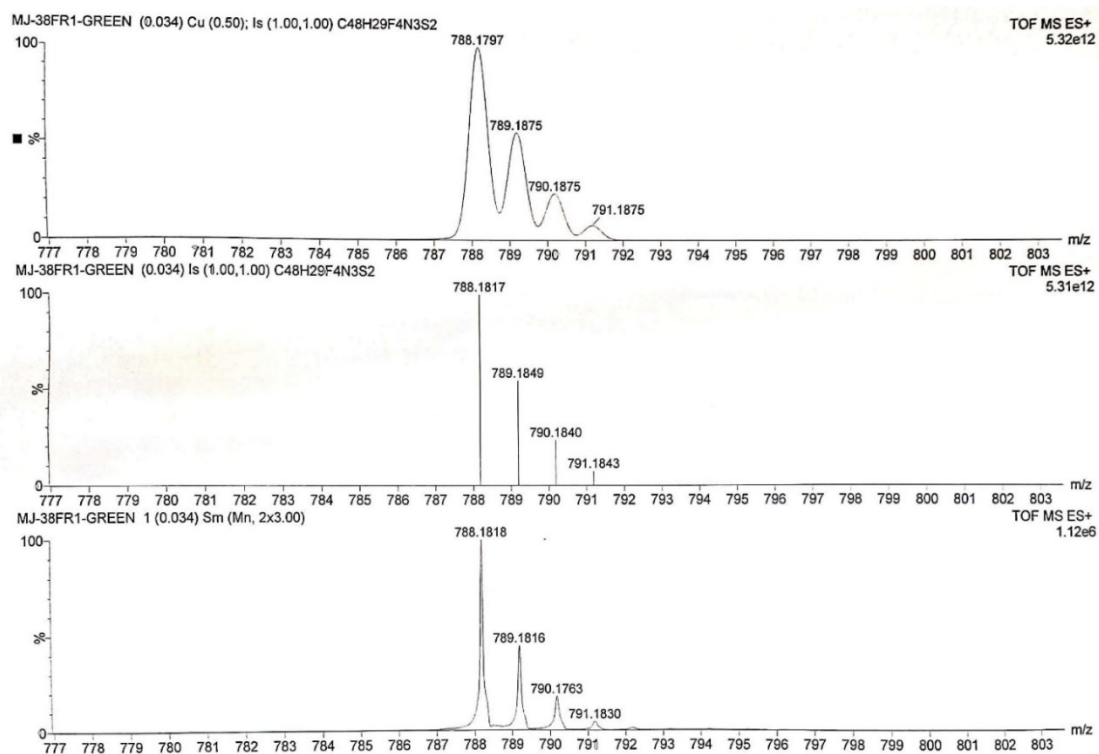

Fig.S3 HRMS Spectra of 12.

### 3.2 UV-vis spectra:

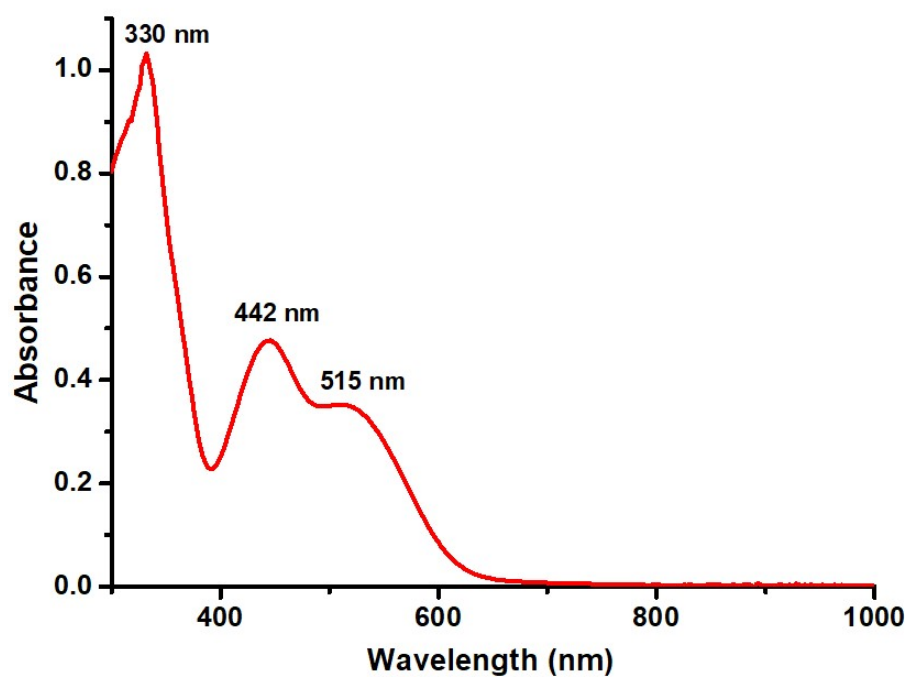

Fig. S4 UV-vis Spectra of 10.

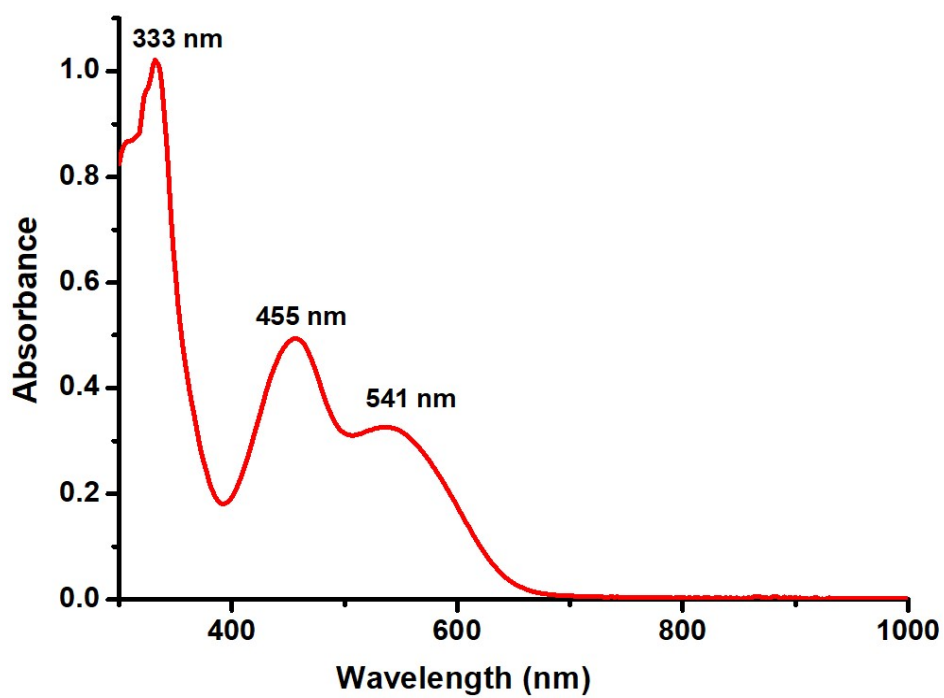

Fig. S5 UV-vis Spectra of 11.

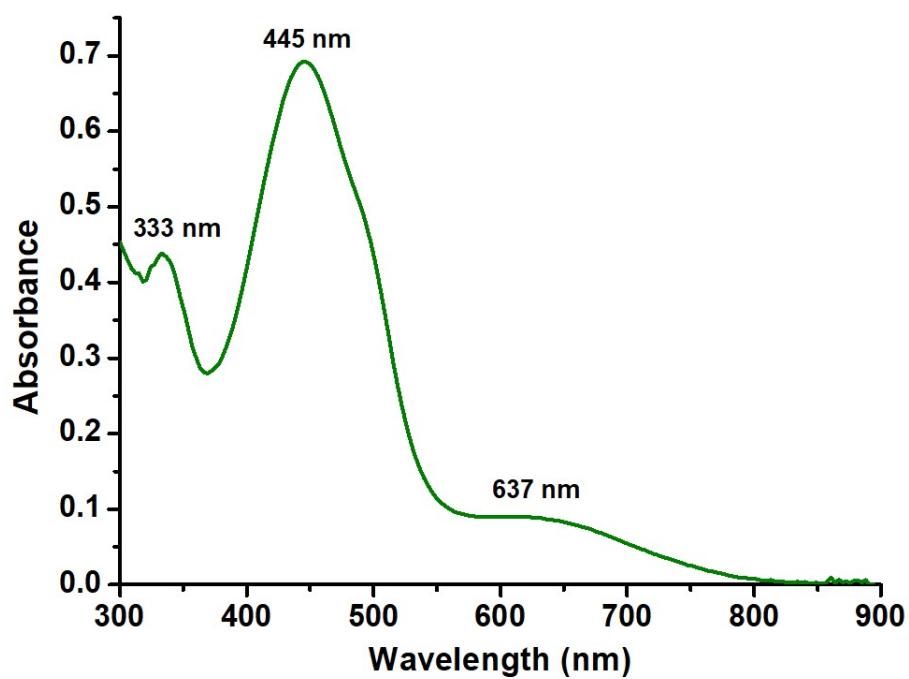

Fig. S6 UV-vis Spectra of 12.



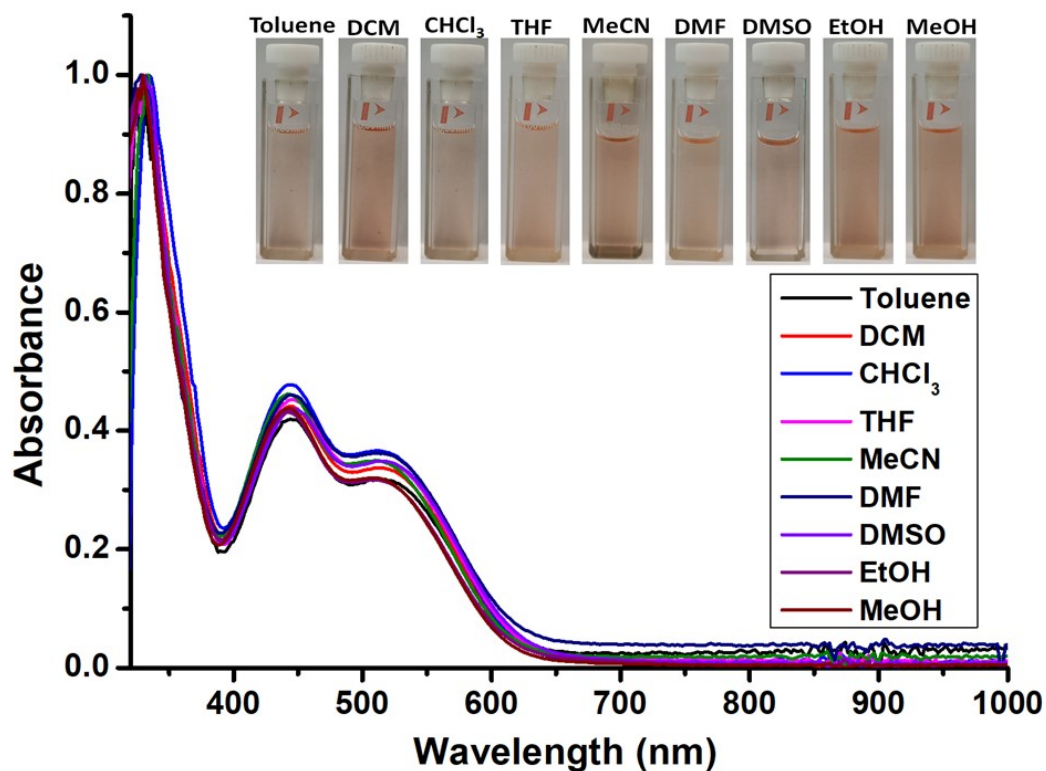

Fig. S7 UV-vis Spectral change induced upon change of solvent systems for receptor 10.

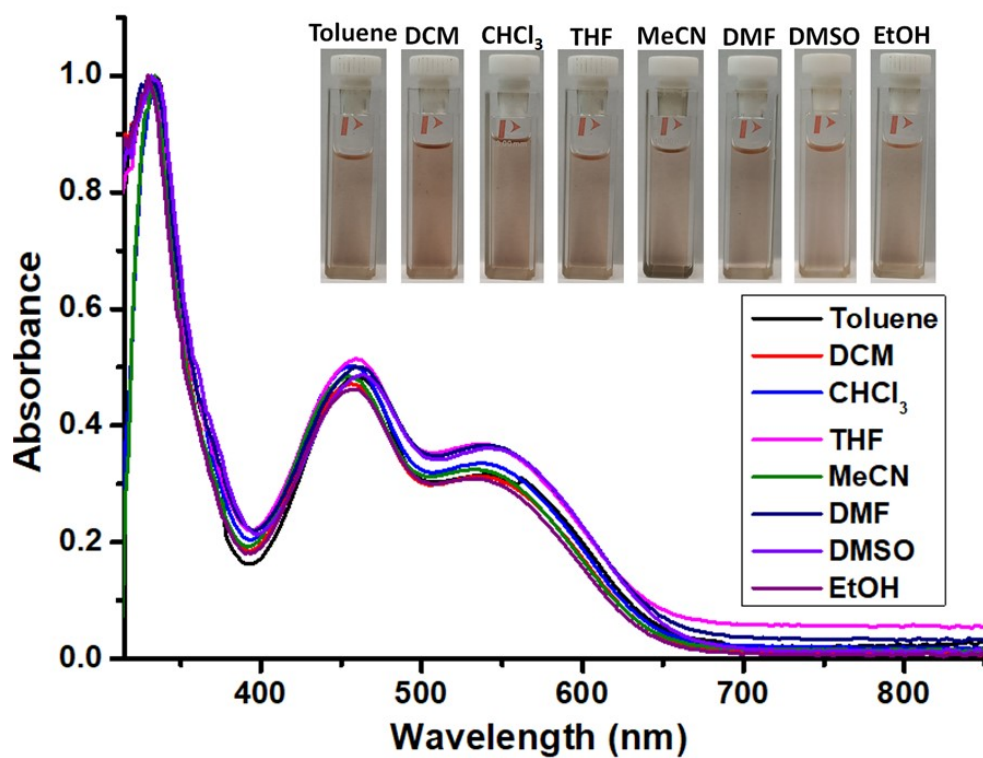

Fig. S8 UV-vis Spectral change induced upon change of solvent systems for receptor 11.

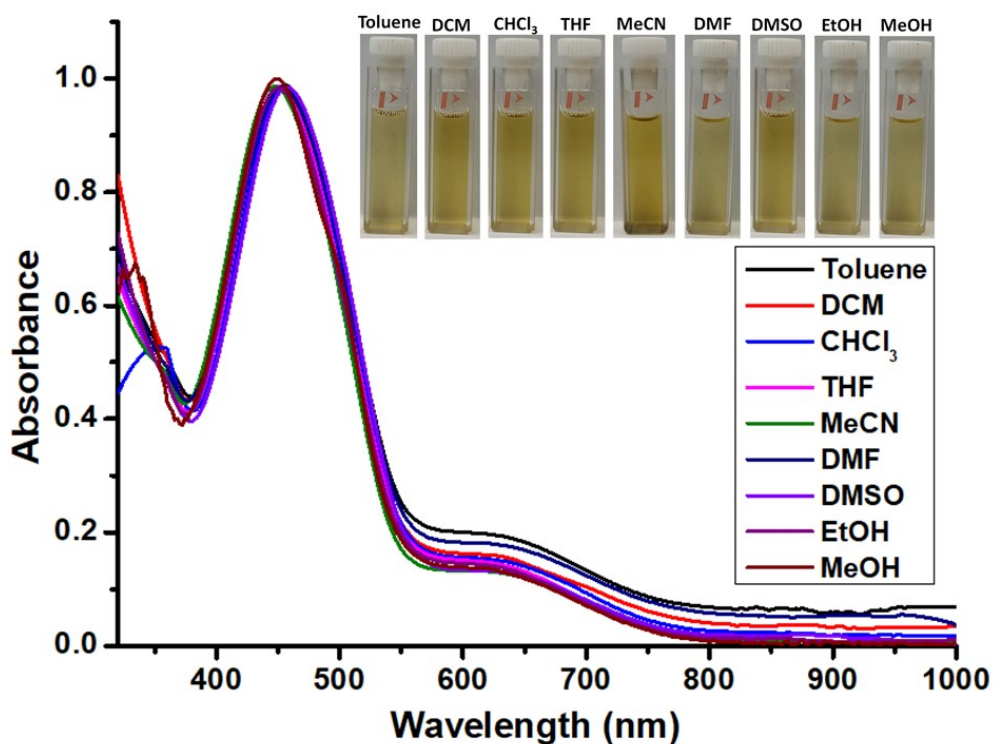

Fig. S9 UV-vis Spectral change induced upon change of solvent systems for receptor **12**.

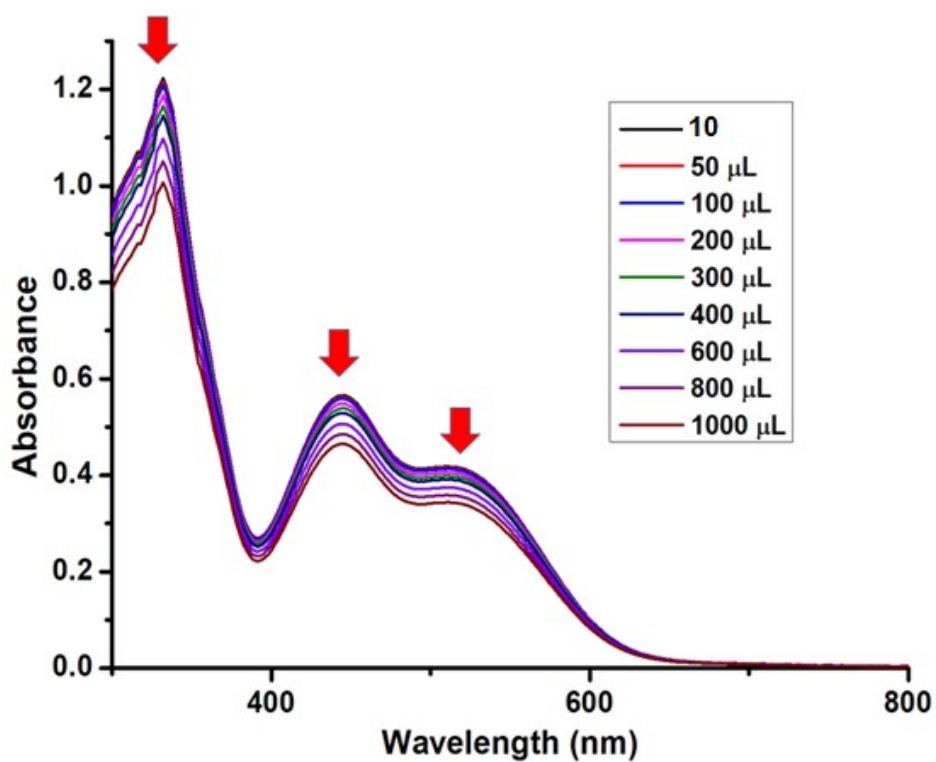

Fig. S10 Change in absorption spectrum of **10** ( $4.98 \times 10^{-5}$  M) upon addition of TBABr (0.5 M) in CHCl<sub>3</sub> at 298 K.

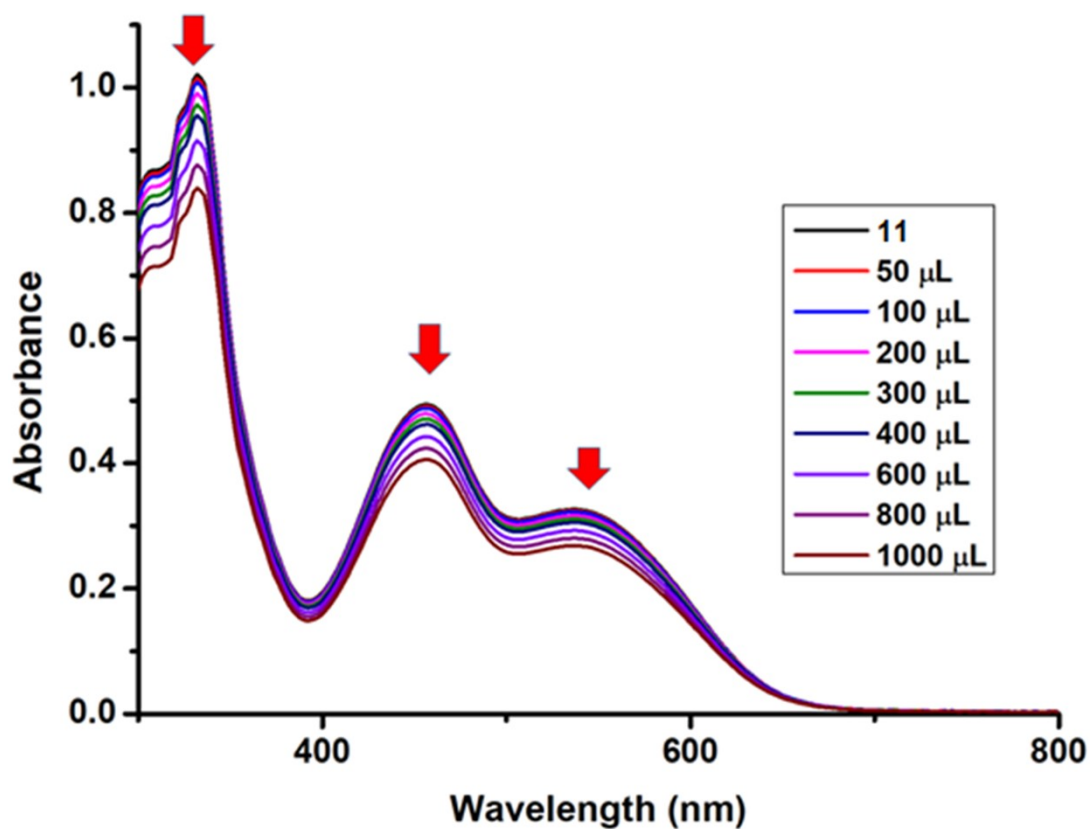

**Fig.S11** Change in absorption spectrum of **11** ( $9.08 \times 10^{-5}$  M) upon addition of TBABr (0.5 M) in CHCl<sub>3</sub> at 298 K.

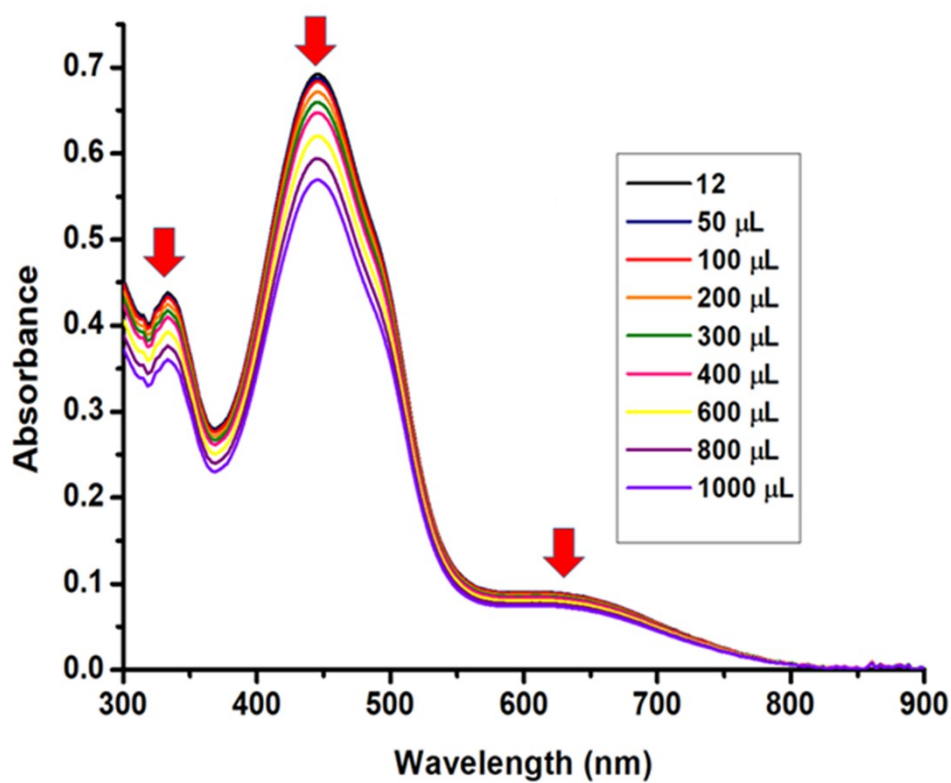

**Fig. S12** Change in absorption spectrum of **12** ( $4.1 \times 10^{-5}$  M) upon addition of TBABr (0.5 M) in CHCl<sub>3</sub> at 298 K.

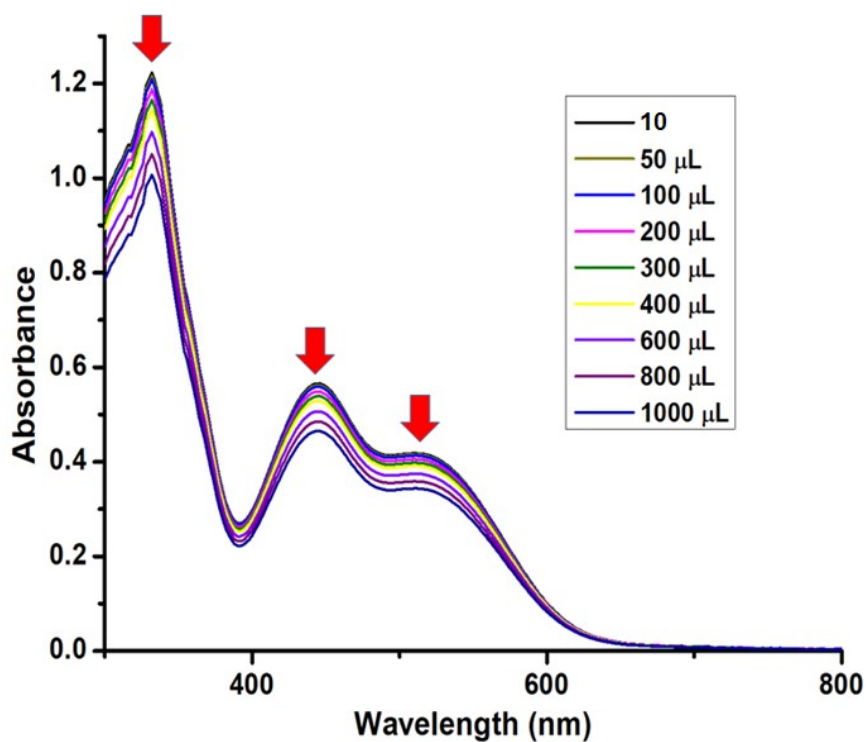

**Fig. S13** Change in absorption spectrum of **10** ( $4.98 \times 10^{-5}$  M) upon addition of TBACl (0.5 M) in CHCl<sub>3</sub> at 298 K.

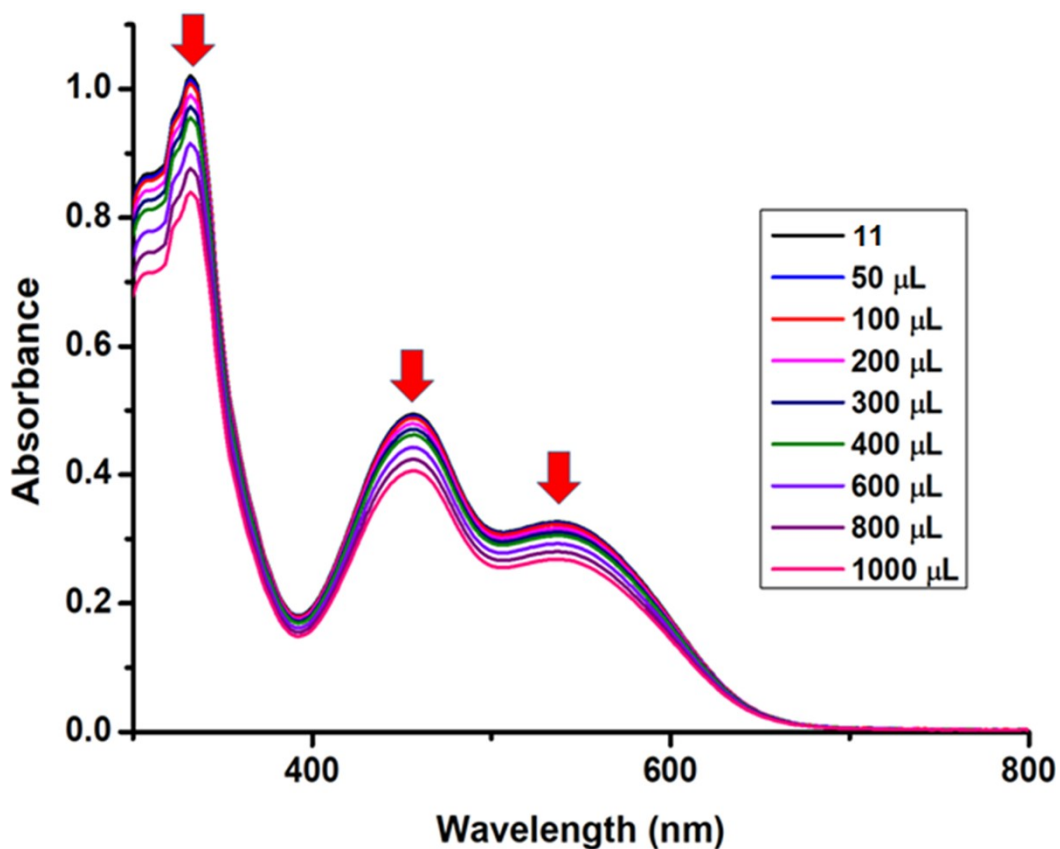

**Fig. S14** Change in absorption spectrum of **11** ( $9.08 \times 10^{-5}$  M) upon addition of TBACl (0.5 M) in CHCl<sub>3</sub> at 298 K.

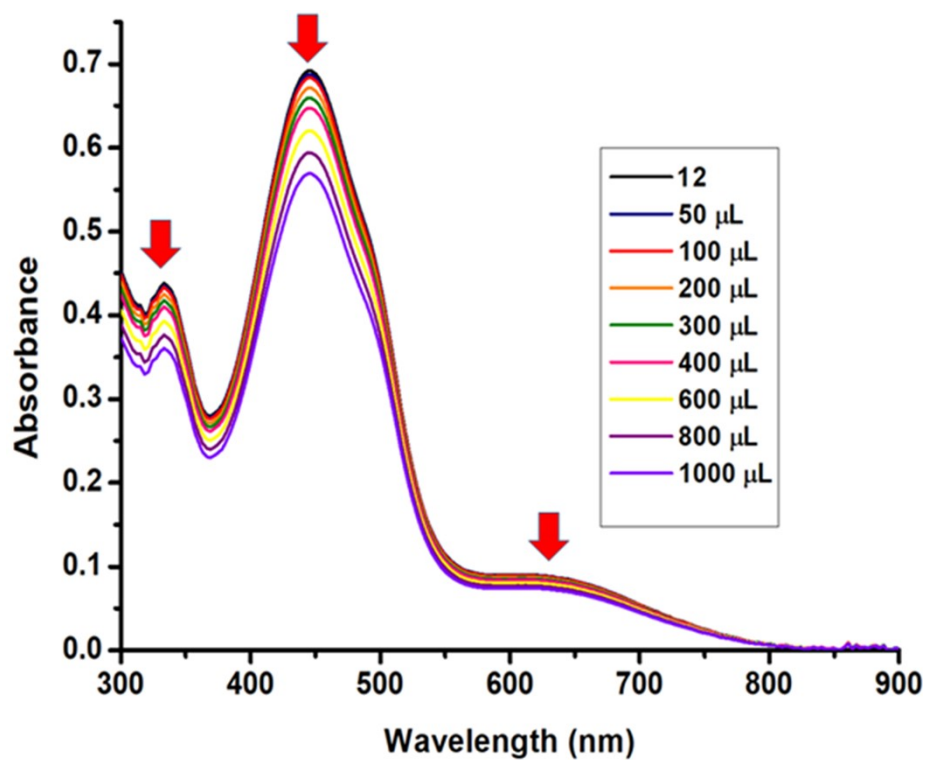

**Fig. S15** Change in absorption spectrum of **12** ( $4.10 \times 10^{-5}$  M) upon addition of TBACl (0.5 M) in  $\text{CHCl}_3$  at 298 K.

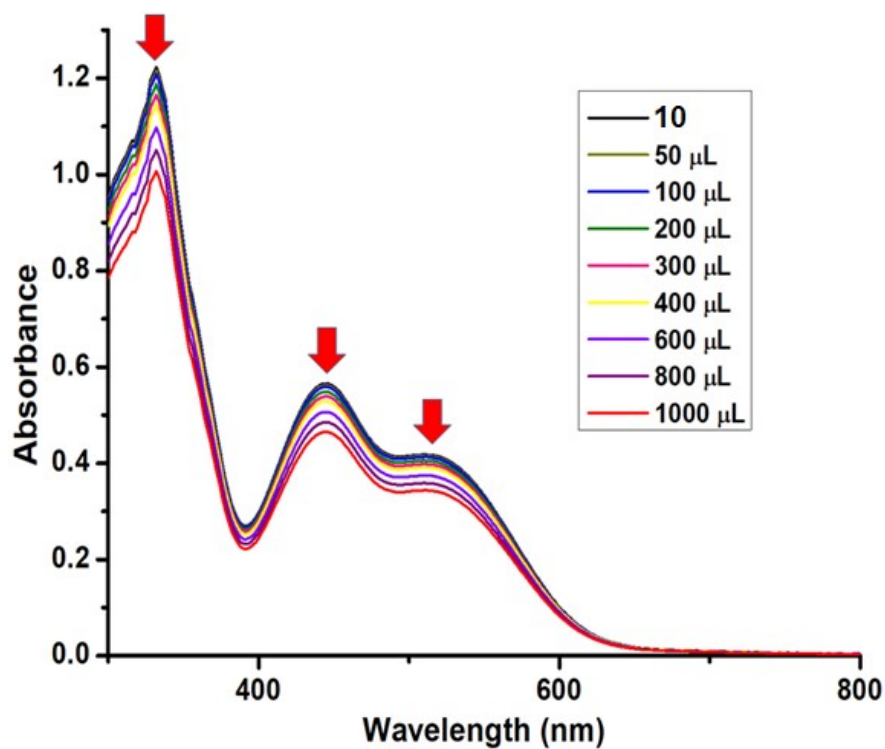

**Fig. S16** Change in absorption spectrum of **10** ( $4.98 \times 10^{-5}$  M) upon addition of TBAI (0.5 M) in  $\text{CHCl}_3$  at 298 K.



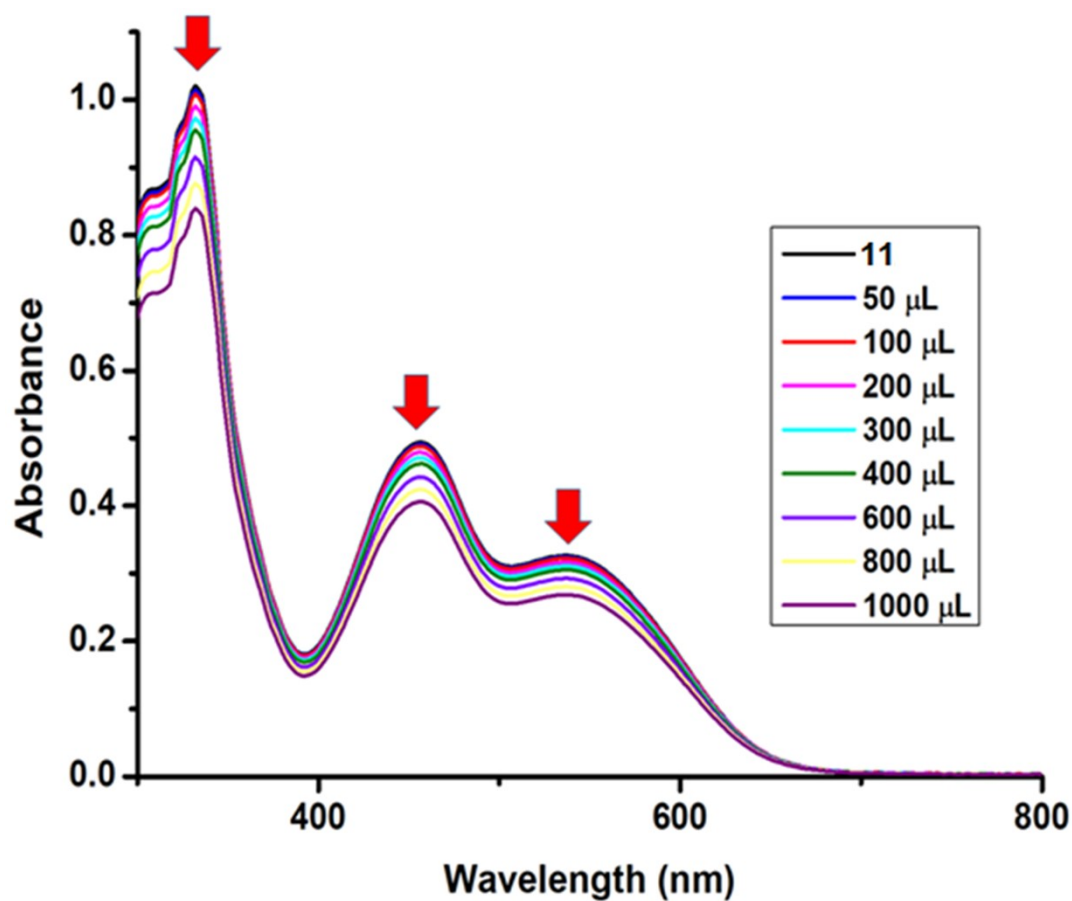

**Fig. S17** Change in absorption spectrum of **11** ( $9.08 \times 10^{-5}$  M) upon addition of TBAI (0.5 M) in CHCl<sub>3</sub> at 298 K.

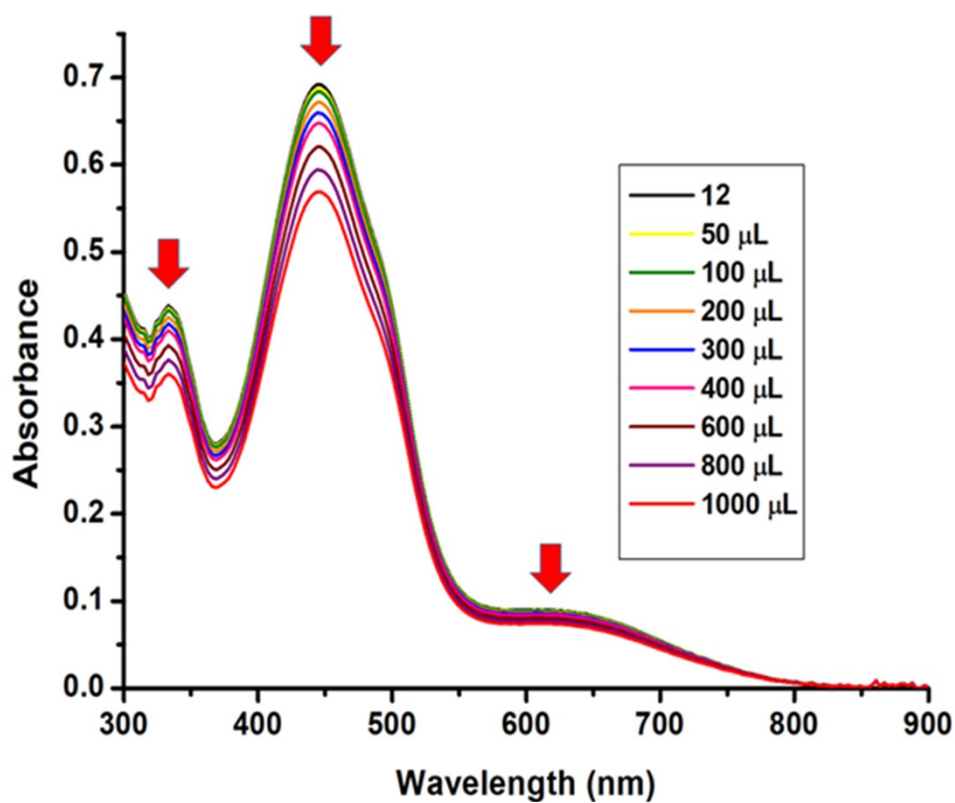

**Fig. S18** Change in absorption spectrum of **12** ( $4.1 \times 10^{-5}$  M) upon addition of TBAI (0.5 M) in CHCl<sub>3</sub> at 298 K.

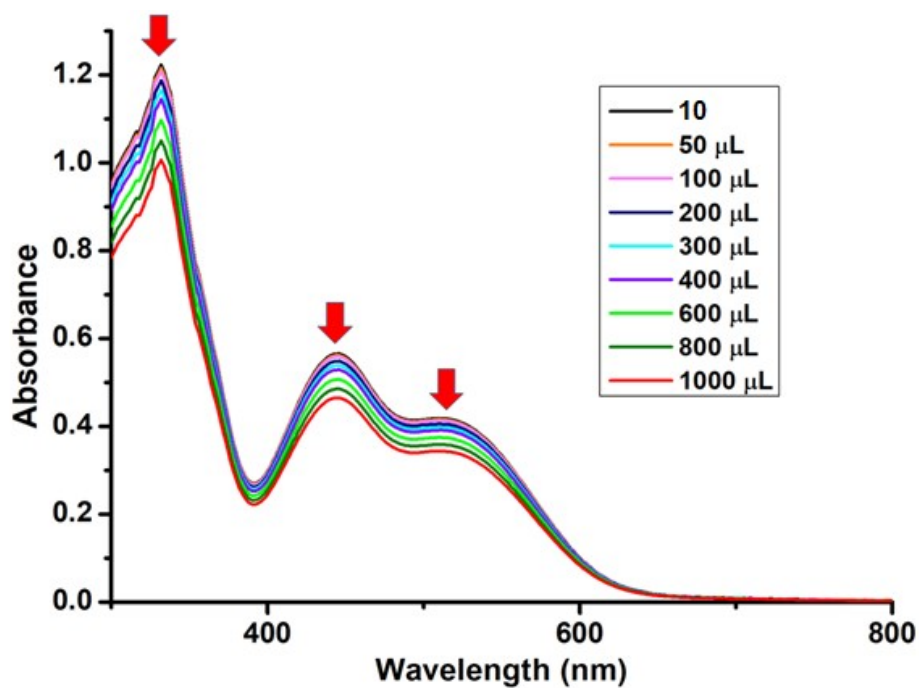

**Fig.S19** Change in absorption spectrum of **10** ( $4.98 \times 10^{-5}$  M) upon addition of TBAH<sub>2</sub>PO<sub>4</sub> (0.5 M) in CHCl<sub>3</sub> at 298 K.

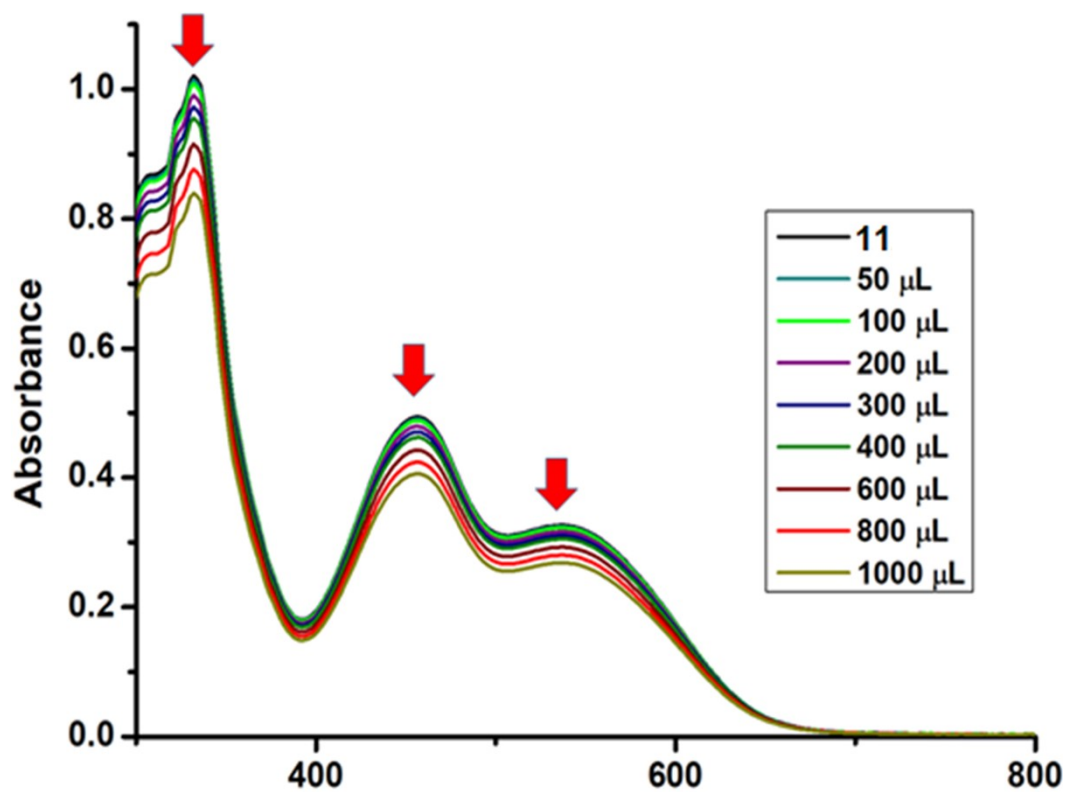

**Fig. S20** Change in absorption spectrum of **11** ( $9.08 \times 10^{-5}$  M) upon addition of TBAH<sub>2</sub>PO<sub>4</sub> (0.5 M) in CHCl<sub>3</sub> at 298 K.

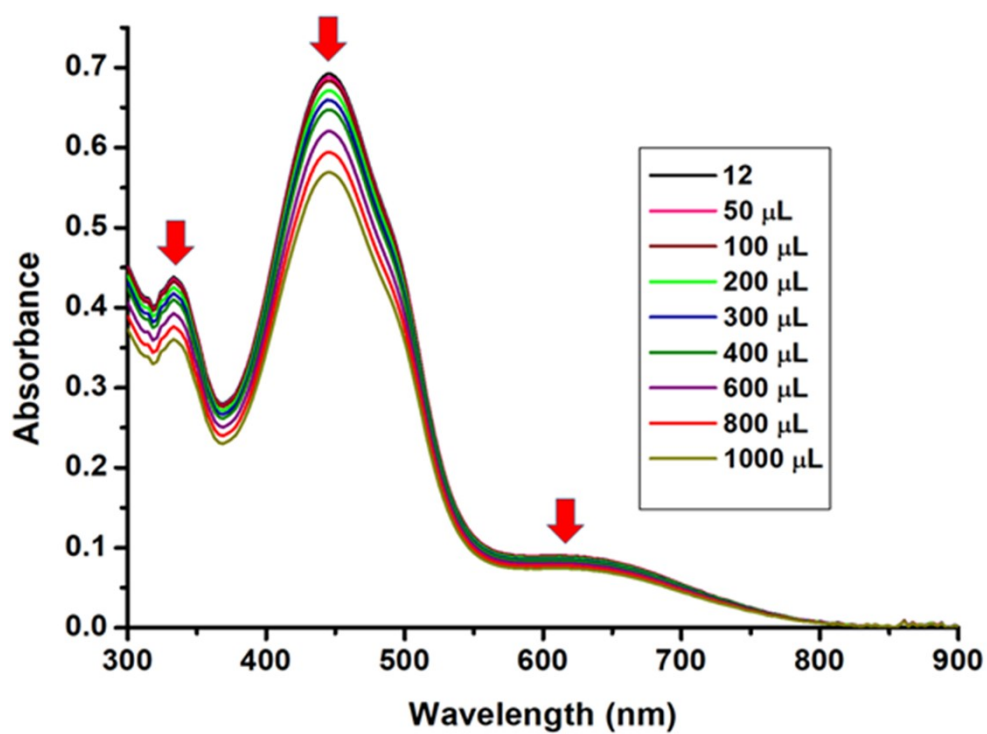

**Fig.S21** Change in absorption spectrum of **12** ( $4.1 \times 10^{-5}$  M) upon addition of TBAH<sub>2</sub>PO<sub>4</sub> (0.5 M) in CHCl<sub>3</sub> at 298 K.

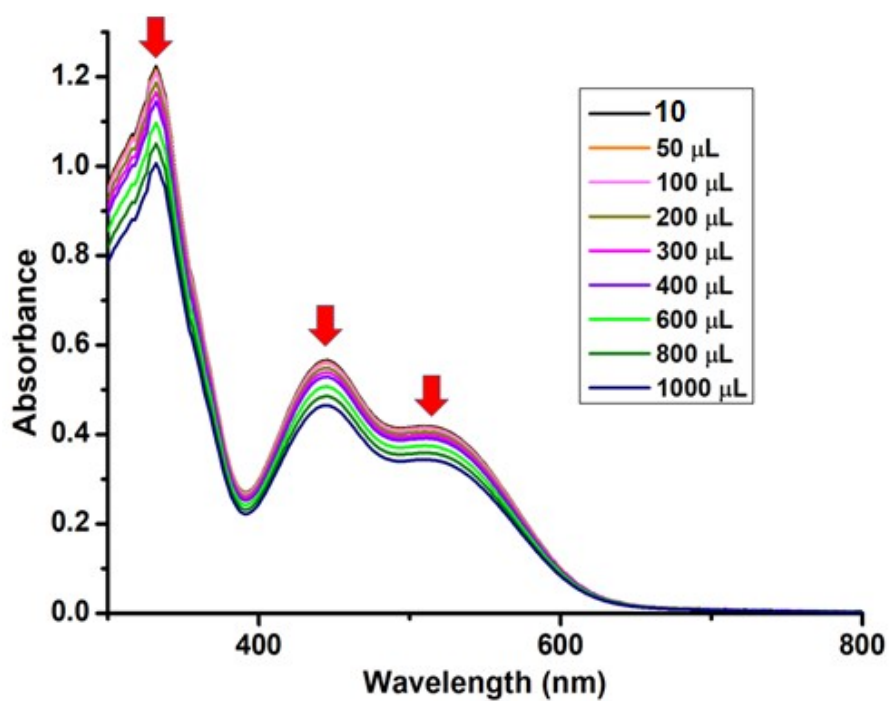

**Fig. S22** Change in absorption spectrum of **10** ( $4.98 \times 10^{-5}$  M) upon addition of (TBA)<sub>3</sub>HP<sub>2</sub>O<sub>7</sub> (0.5 M) in CHCl<sub>3</sub> at 298 K.



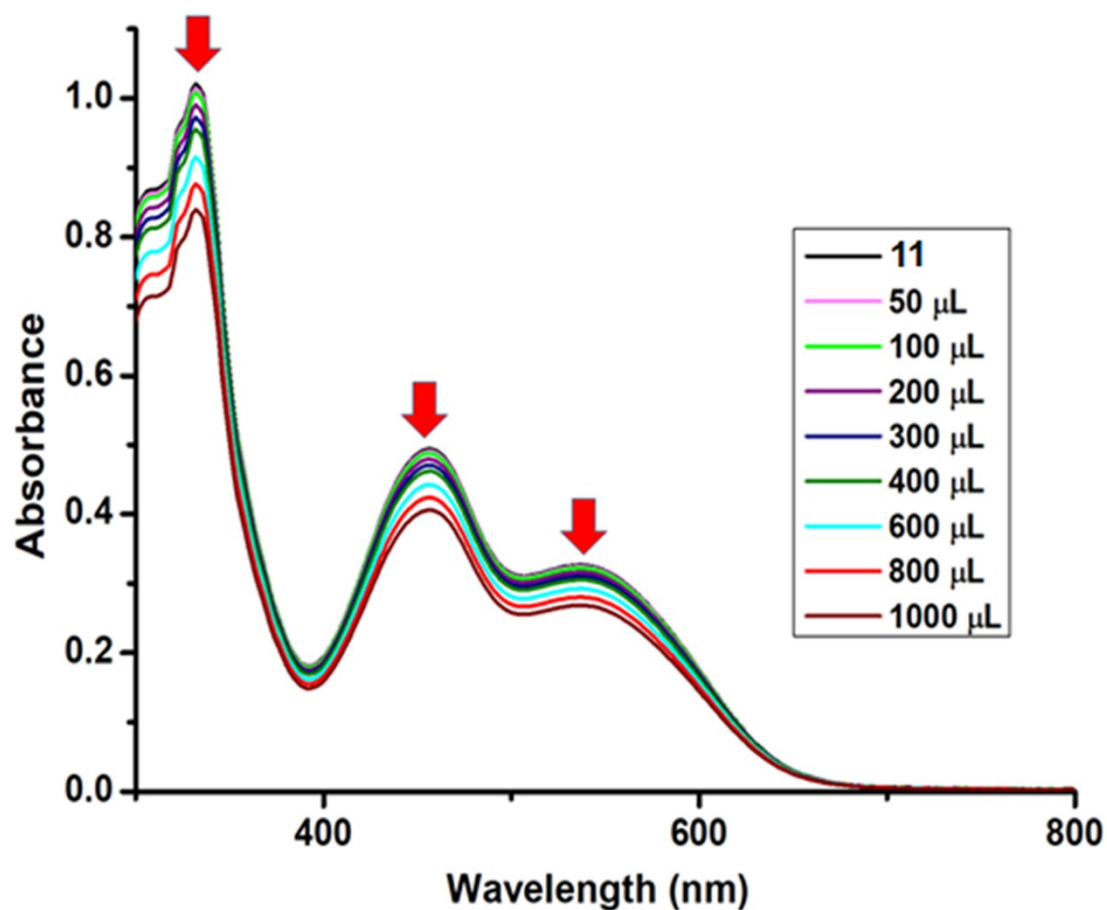

**Fig. S23** Change in absorption spectrum of **11** ( $9.08 \times 10^{-5}$  M) upon addition of  $(\text{TBA})_3\text{HP}_2\text{O}_7$  (0.5 M) in  $\text{CHCl}_3$  at 298 K.

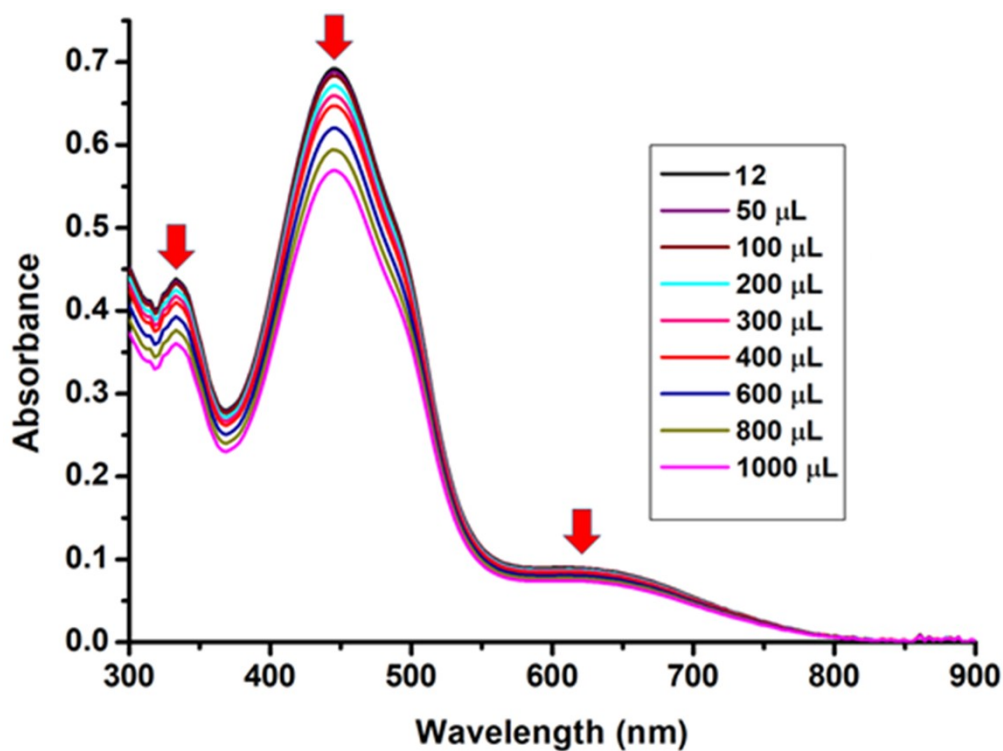

**Fig. S24** Change in absorption spectrum of **12** ( $4.1 \times 10^{-5}$  M) upon addition of  $(\text{TBA})_3\text{HP}_2\text{O}_7$  (0.5 M) in  $\text{CHCl}_3$  at 298 K.

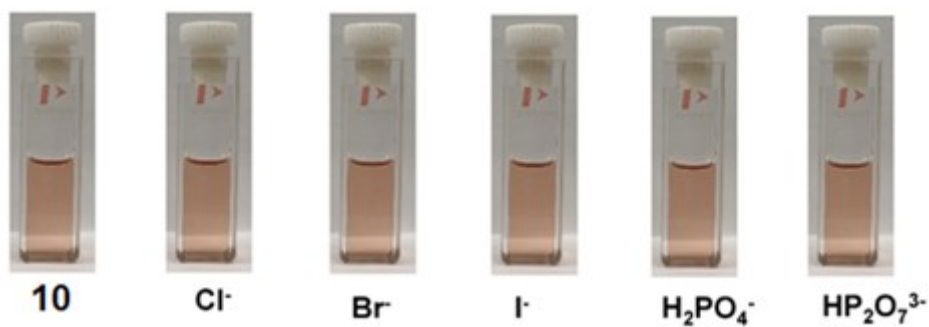

**Fig. S25** Color change induced upon addition of anions (excess equiv as the  $\text{Bu}_4\text{N}^+$  salt) to receptor **10** in  $\text{CHCl}_3$  at 298 K.

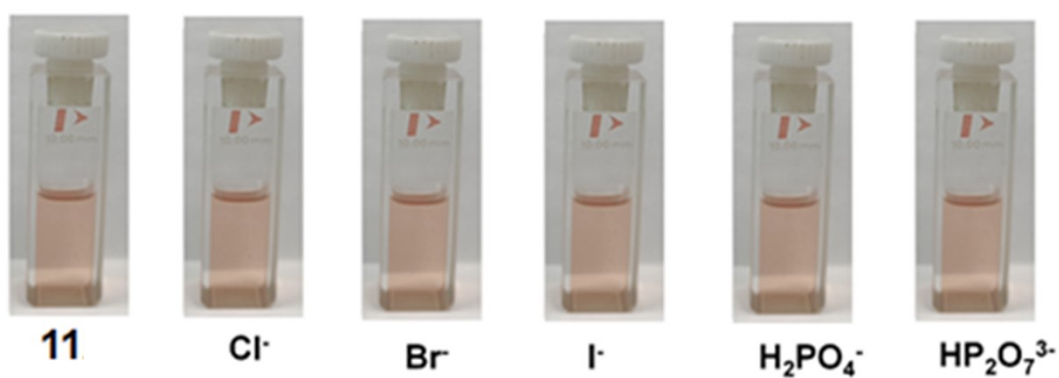

**Fig. S26** Color change induced upon addition of anions (excess equiv as the  $\text{Bu}_4\text{N}^+$  salt) to receptor **11** in  $\text{CHCl}_3$  at 298 K.

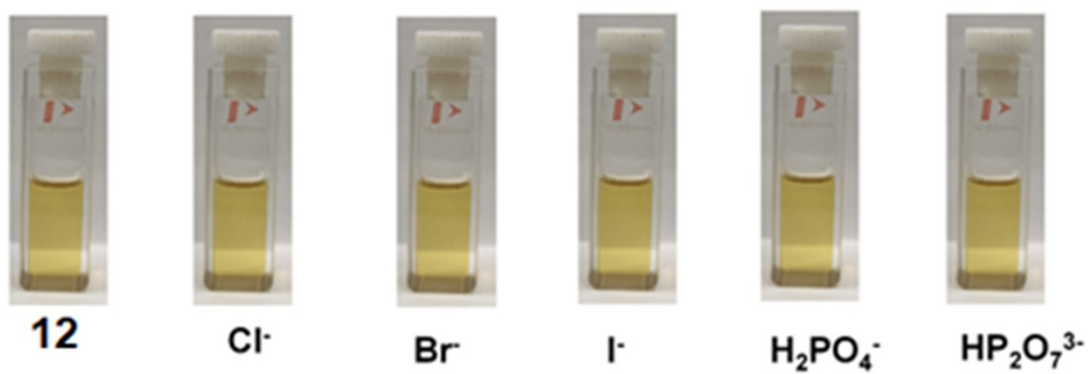

**Fig. S27** Color change induced upon addition of anions (excess equiv as the  $\text{Bu}_4\text{N}^+$  salt) to receptor **12** in  $\text{CHCl}_3$  at 298 K.

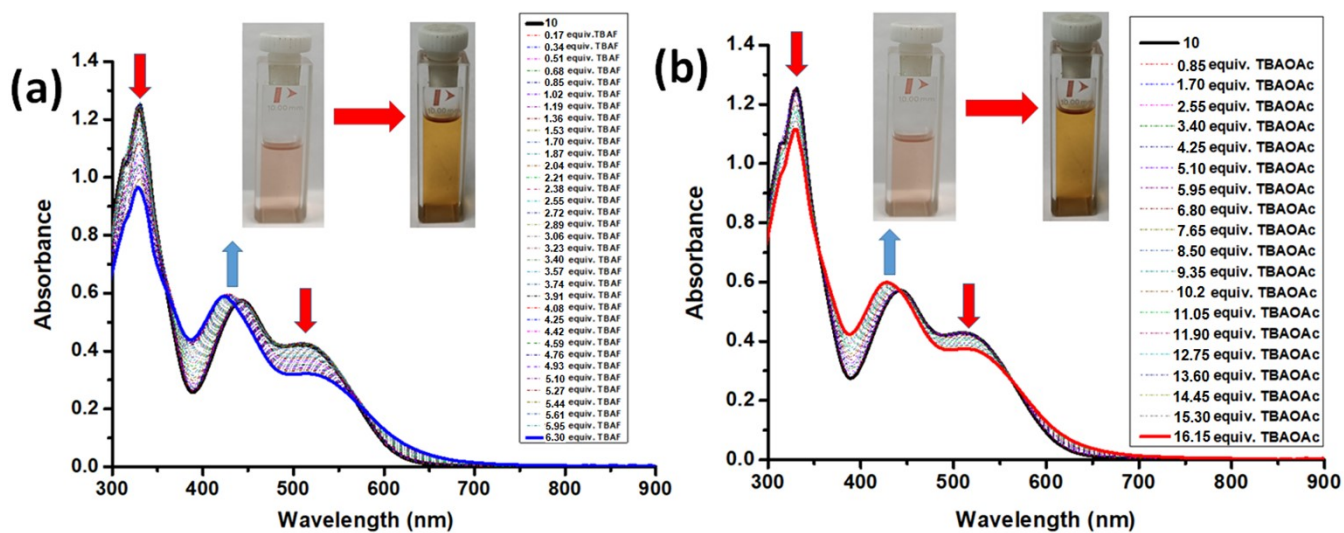

**Fig. S28** (a) Change in absorption spectra of **10** ( $4.98 \times 10^{-5}$  M) upon titration with TBAF (0.05 M) and (b) TBAOAc (0.1 M) in  $\text{CHCl}_3$  at 298 K.

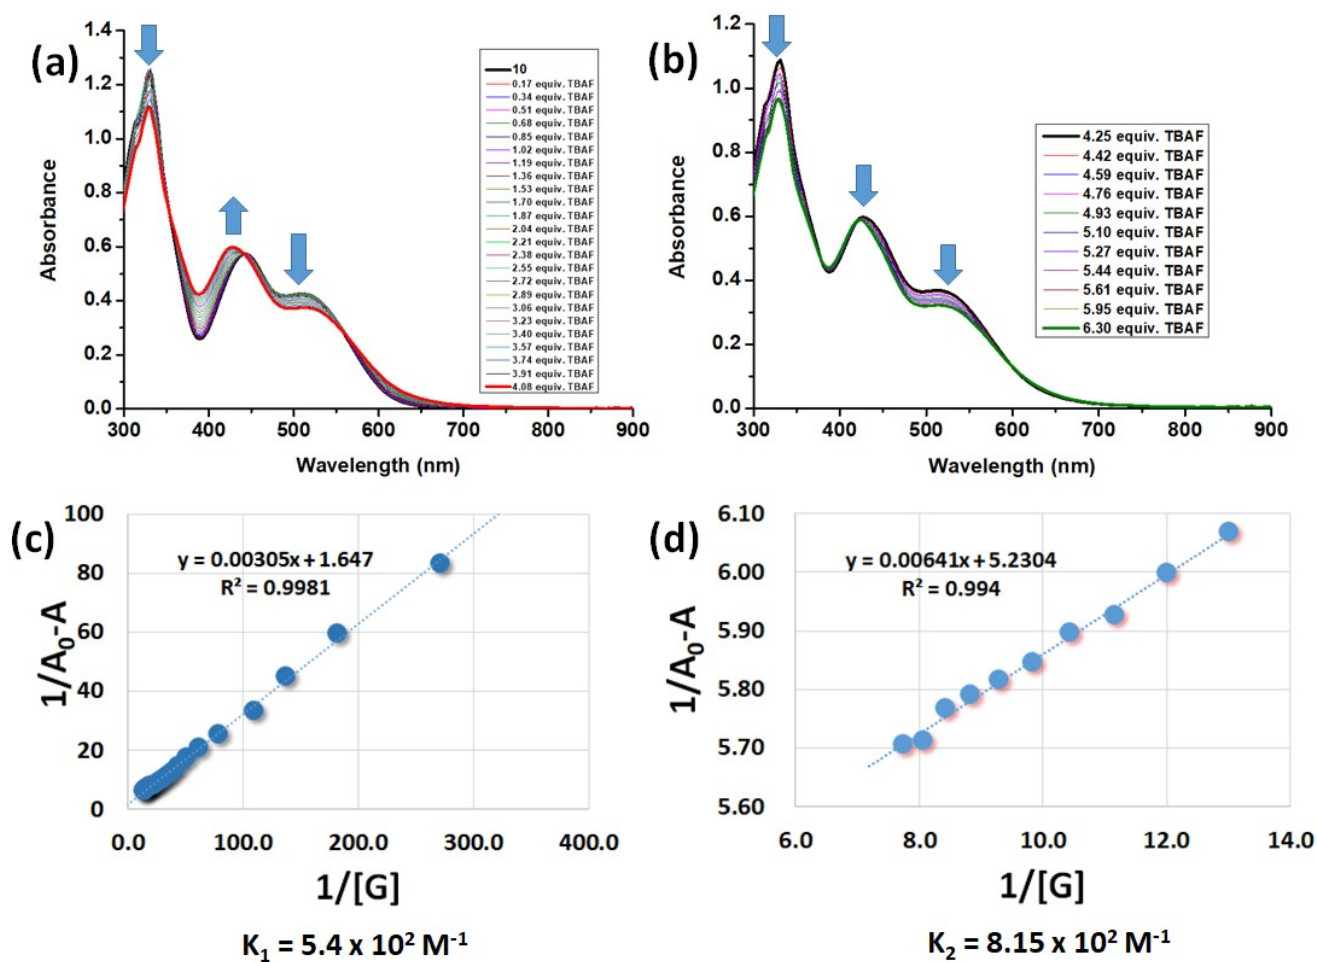

**Fig. S28A** Change in absorption spectra of **10** ( $4.98 \times 10^{-5}$  M) upon titration of TBAF (0.05 M) (a) from 0-4.08 equiv of  $\text{F}^-$  addition and (b) 4.25-6.30 equiv  $\text{F}^-$  addition in  $\text{CHCl}_3$  at 298 K. (c) and (d) show B-H plots of  $[\mathbf{10-F}]^-$  and  $[\mathbf{10}]^-$  respectively from UV-vis titration experiment to determine binding constant (Some data points in the figure deviated very marginally from the fitting curve. However, the overall fitting of the data points was reasonably good as clearly evident from the  $R^2$  value of  $>0.98$ ).

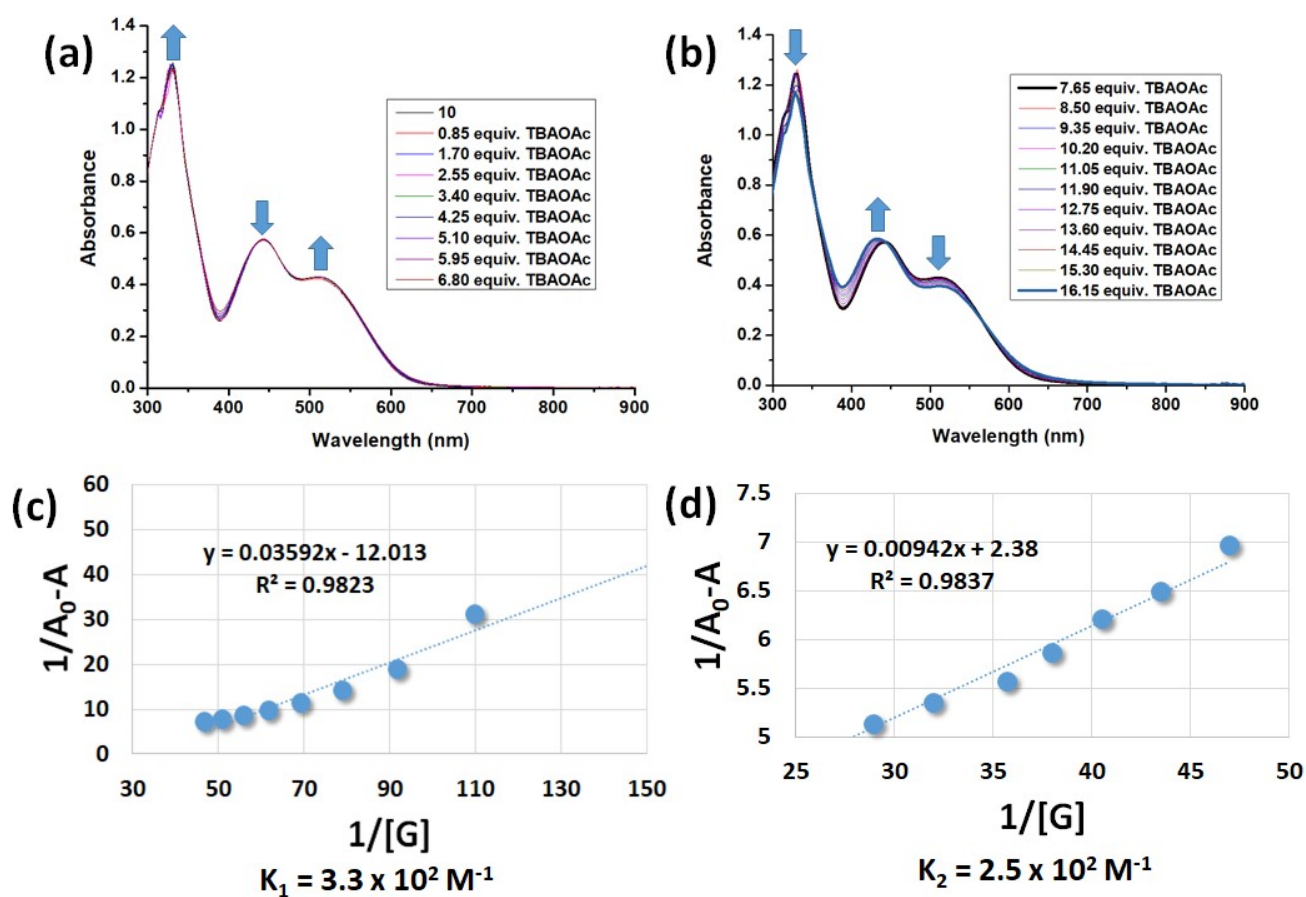

**Fig. S28B** Change in absorption spectra of **10** ( $4.98 \times 10^{-5}$  M) upon titration of TBAOAc (0.1 M) (a) from 0-6.8 equiv of AcO<sup>-</sup> addition and (b) 7.65-16.15 equiv AcO<sup>-</sup> addition in CHCl<sub>3</sub> at 298 K. (c) and (d) show B-H plots of  $[10-OAc]^-$  and  $[10]^-$  respectively from UV-vis titration experiment to determine binding constant (Some data points in the figure deviated very marginally from the fitting curve. However, the overall fitting of the data points was reasonably good as clearly evident from the R<sup>2</sup> value of >0.98).



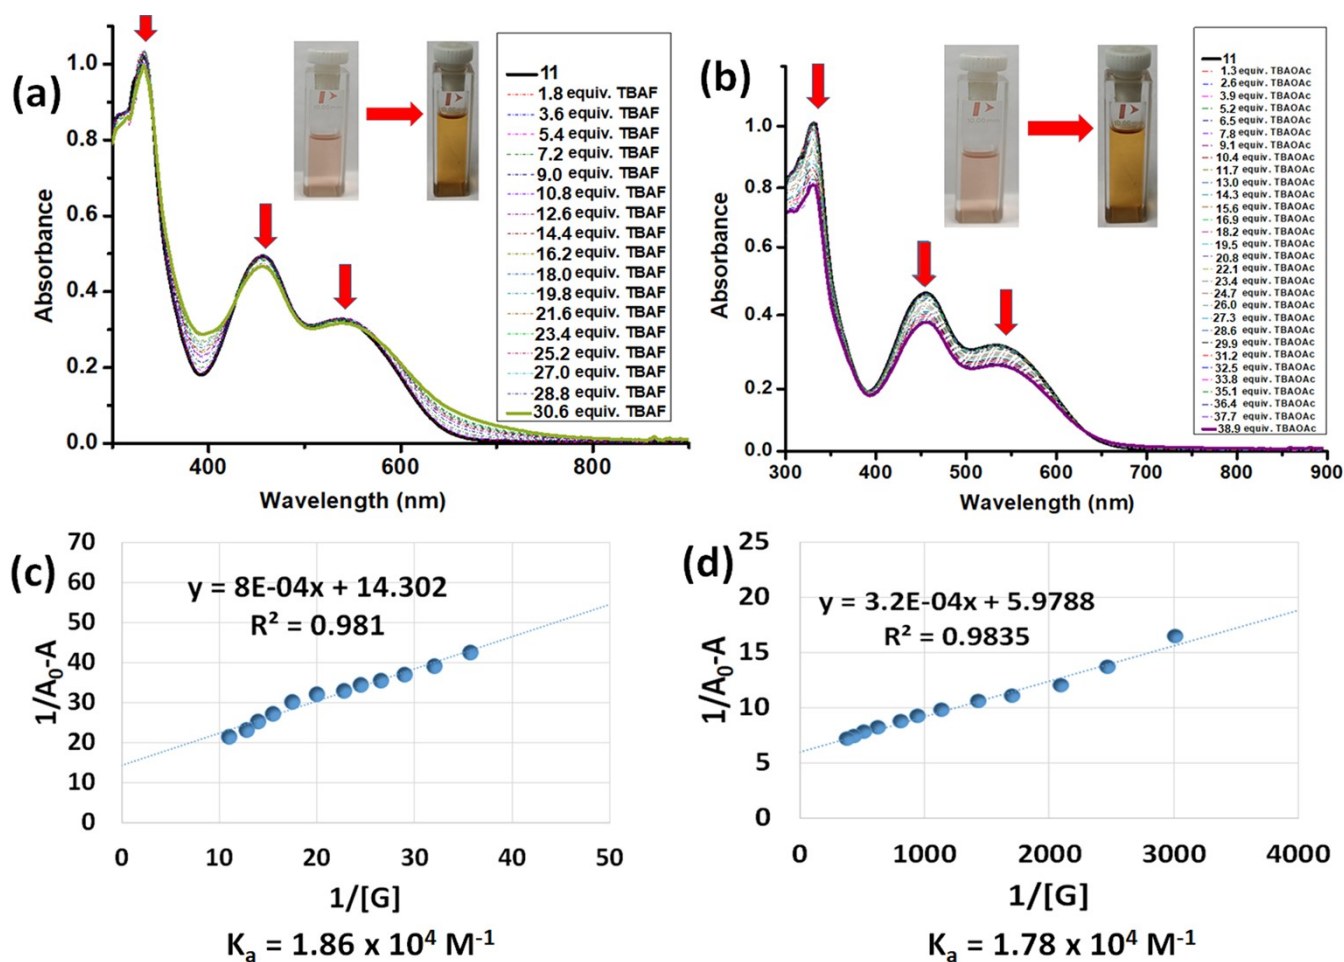

**Fig. S29** (a) Change in absorption spectra of **11** ( $9.08 \times 10^{-5}$  M) upon titration of TBAF (0.05 M) and (b) TBAOAc (0.1 M) in  $\text{CHCl}_3$  at 298 K. (c) and (d) show B-H plots of  $[\mathbf{11-F}]^-$  and  $[\mathbf{11-OAc}]^-$  respectively from UV-vis titration experiment to determine binding constant for the formation of host-guest complex (Some data points in the figure deviated very marginally from the fitting curve. However, the overall fitting of the data points was reasonably good as clearly evident from the  $R_2$  value of  $>0.98$ ).

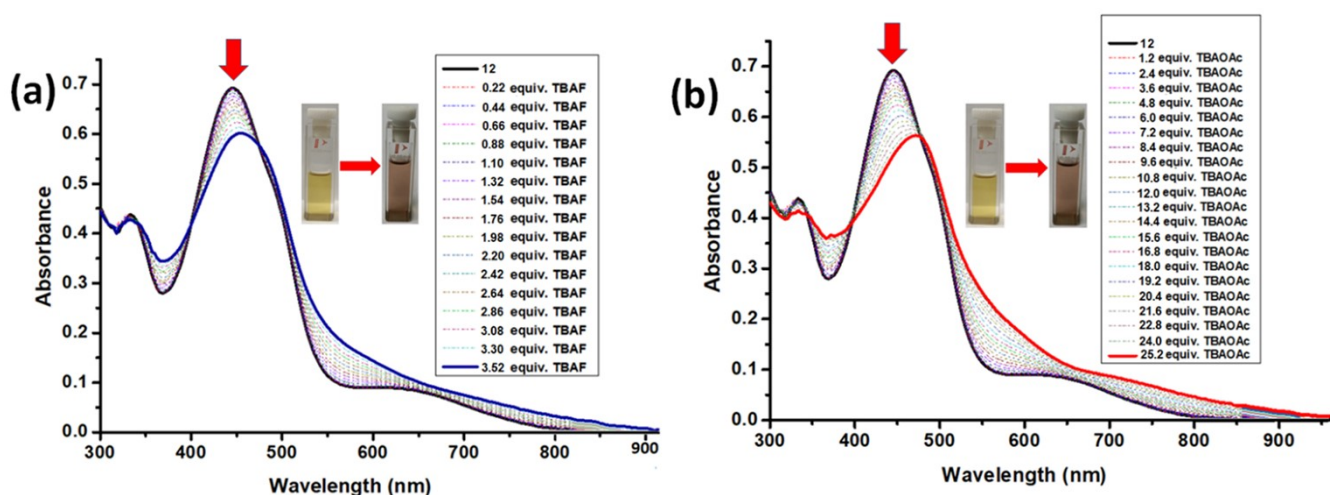

**Fig. S30** (a) Change in absorption spectra of **12** ( $4.10 \times 10^{-5}$  M) upon titration of TBAF (0.05 M) and (b) TBAOAc (0.1 M) in  $\text{CHCl}_3$  at 298 K.

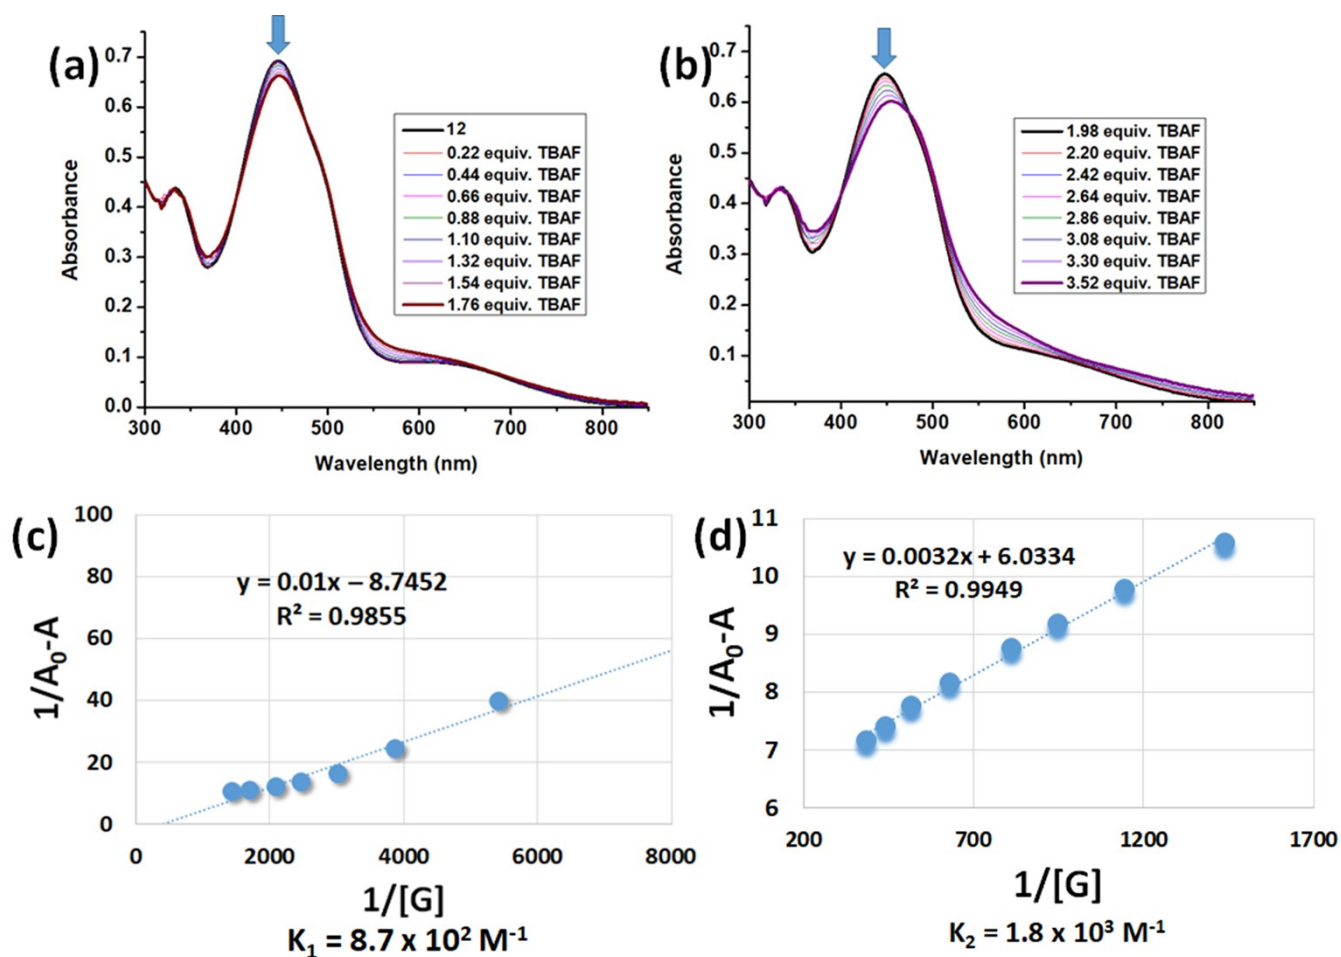

**Fig. S30A** Change in absorption spectra of **12** ( $4.10 \times 10^{-5} \text{ M}$ ) upon titration of TBAF (0.05 M) (a) 0-1.76 equiv of F<sup>-</sup> and (b) 1.98-3.52 equiv of F<sup>-</sup> in CHCl<sub>3</sub> at 298 K. (c) and (d) show B-H plots of [**12**-F]<sup>-</sup> and [**12**]<sup>-</sup> respectively from UV-vis titration experiment to determine binding constant (Some data points in the figure deviated very marginally from the fitting curve. However, the overall fitting of the data points was reasonably good as clearly evident from the R<sup>2</sup> value of >0.98).

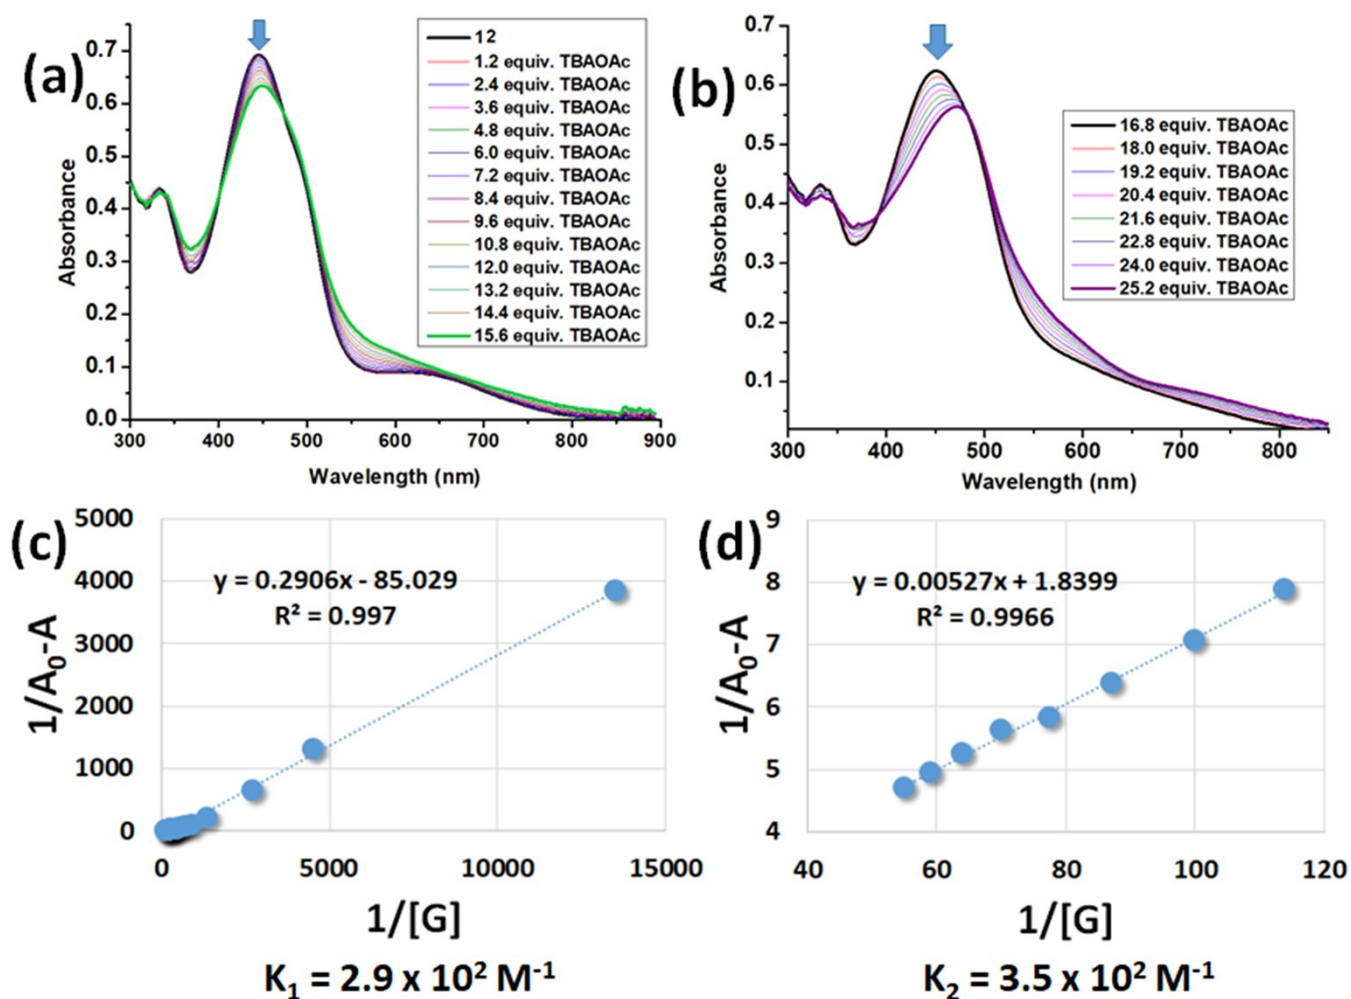

**Fig. S30B** Change in absorption spectra of **12** (4.10 × 10<sup>-5</sup> M) upon titration of TBAOAc (0.1 M) (a) 0-15.6 equiv of AcO<sup>-</sup> and (b) 16.8 - 25.2 equiv of AcO<sup>-</sup> in CHCl<sub>3</sub> at 298 K. (c) and (d) show B-H plots of [12-OAc]<sup>-</sup> and [12]<sup>-</sup> respectively from UV-vis titration experiment to determine binding constant (Some data points in the figure deviated very marginally from the fitting curve. However, the overall fitting of the data points was reasonably good as clearly evident from the R<sup>2</sup> value of >0.98).

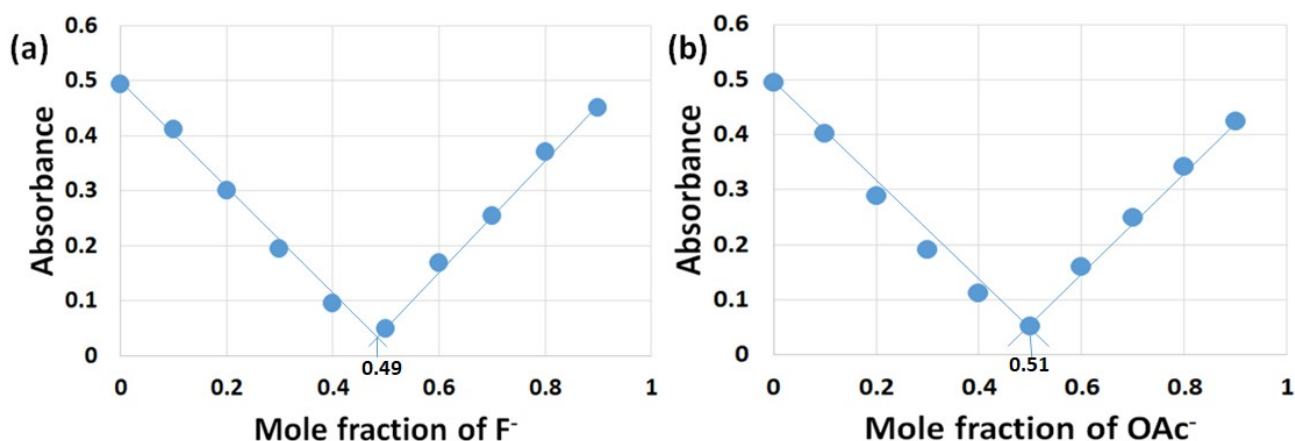

**Fig. S31** Job Plot obtained for **11** (9.08 × 10<sup>-5</sup> M in CHCl<sub>3</sub>) on variation of its absorbance vs mole fraction of (a) F<sup>-</sup> (1.0 × 10<sup>-5</sup> M in CHCl<sub>3</sub>) at λ<sub>max</sub> = 541 nm; (b) AcO<sup>-</sup> (1.0 × 10<sup>-5</sup> M in CHCl<sub>3</sub>) at λ<sub>max</sub> = 541 nm.

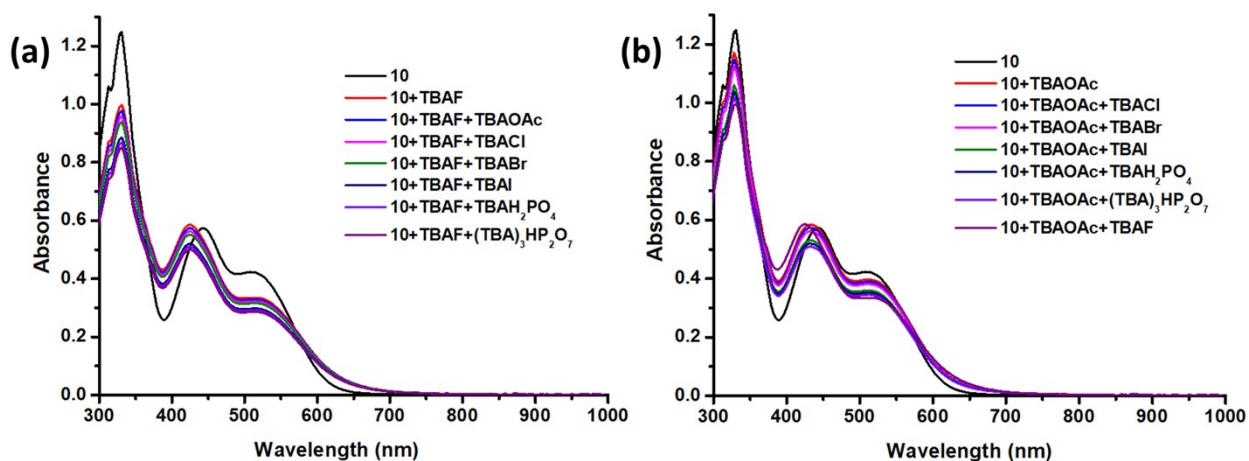

**Fig. S32** Competitive Assay experiments of (a) [10-TBAF] in the presence of other anions and (b) [10-TBAOAc] in the presence of other anions (Absorbance response upon addition of 10 equivalents of  $F^-$ ,  $Cl^-$ ,  $Br^-$ ,  $I^-$ ,  $AcO^-$ ,  $H_2PO_4^-$  and  $HP_2O_7^{3-}$  in the form of their TBA salts).

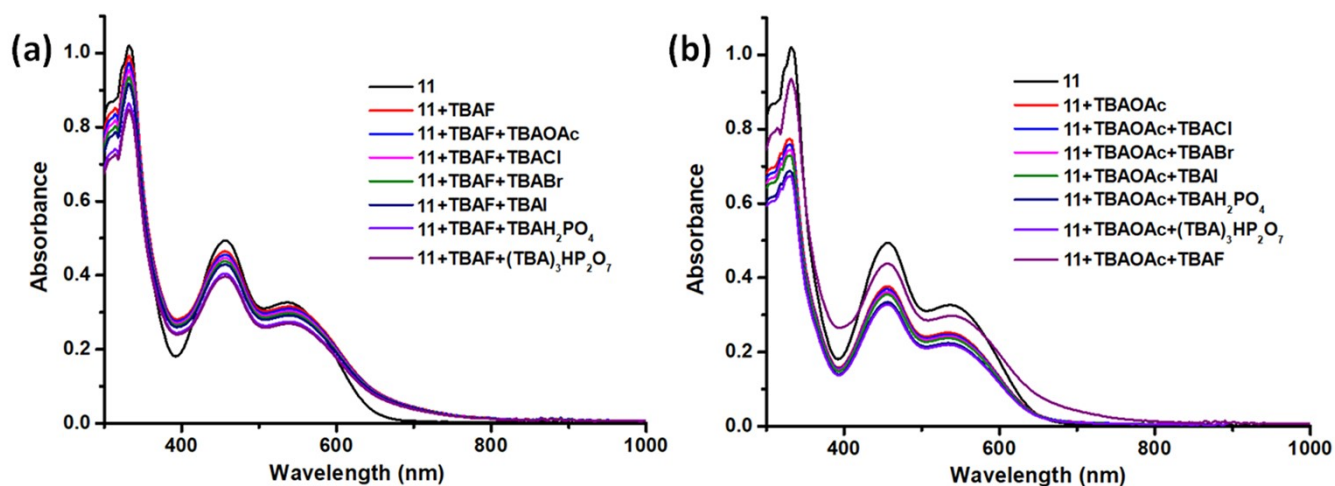

**Fig. S33** Competitive Assay experiments of (a) [11-TBAF] in the presence of other anions and (b) [11-TBAOAc] in the presence of other anions (Absorbance response upon addition of 15 equivalents of  $F^-$ ,  $Cl^-$ ,  $Br^-$ ,  $I^-$ ,  $AcO^-$ ,  $H_2PO_4^-$  and  $HP_2O_7^{3-}$  in the form of their TBA salts).



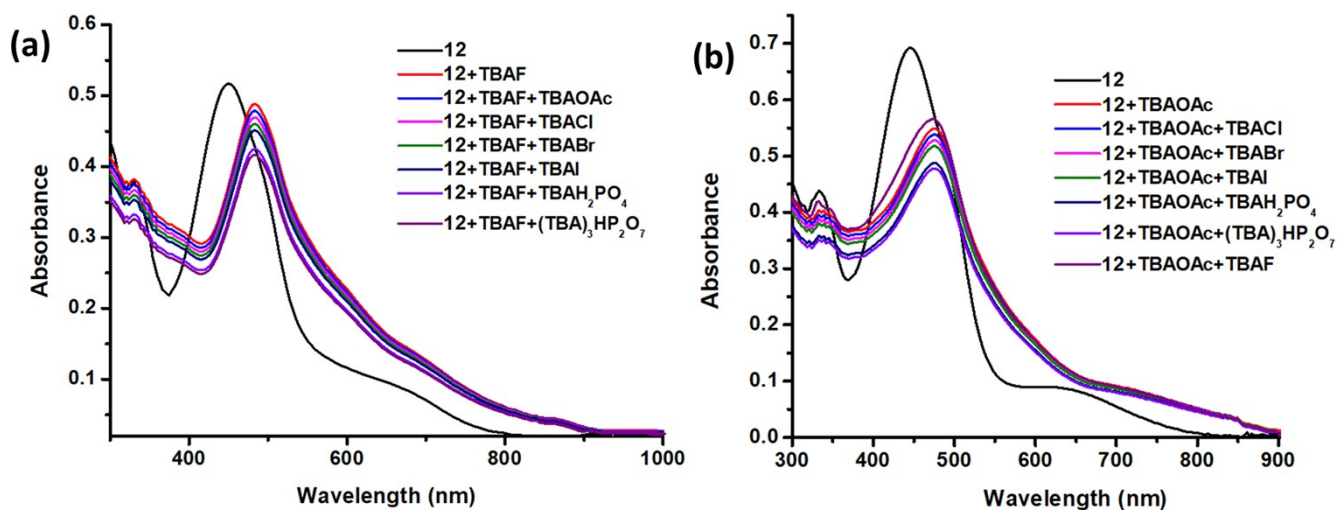

**Fig. S34** Competitive Assay experiments of (a) [12-TBAF] in the presence of other anions and (b) [12-TBAOAc] in the presence of other anions (Absorbance response upon addition of 10 equivalents of  $F^-$ ,  $Cl^-$ ,  $Br^-$ ,  $I^-$ ,  $AcO^-$ ,  $H_2PO_4^-$  and  $HP_2O_7^{3-}$  in the form of their TBA salts).

### 3.3 NMR spectra:

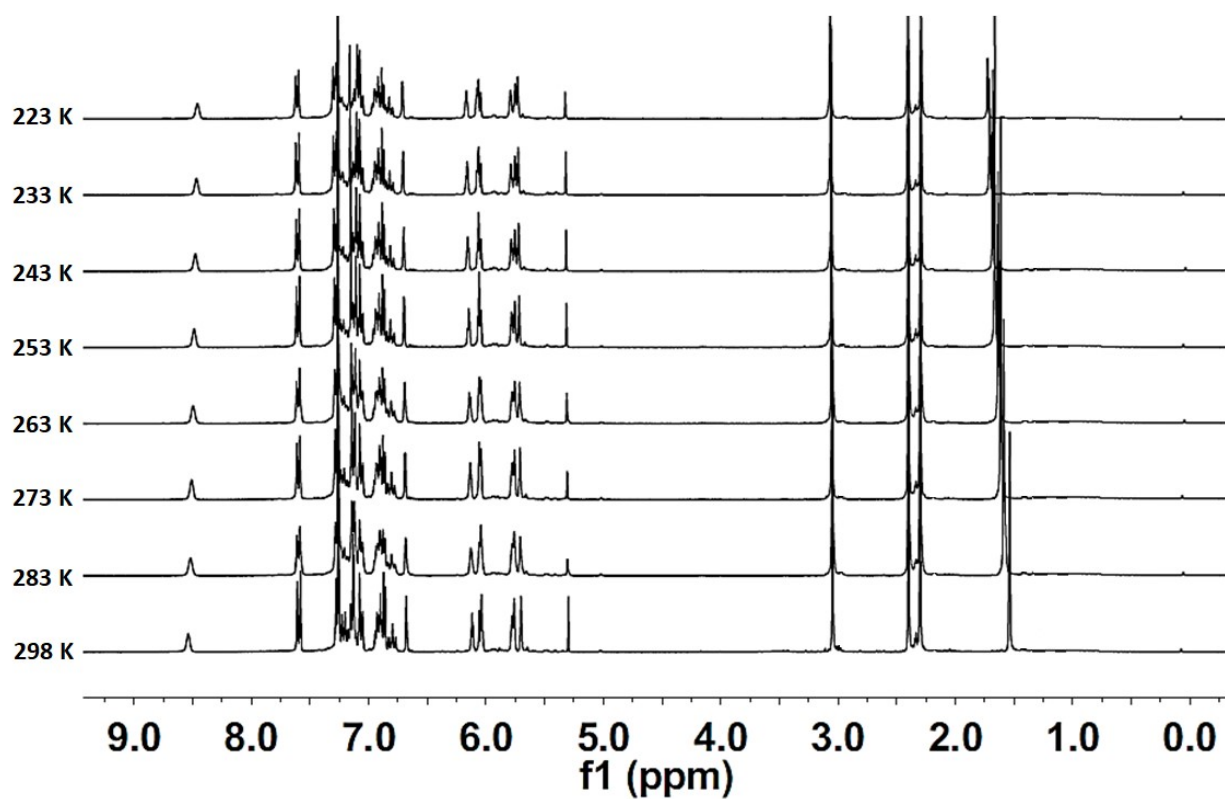

Fig. S35 Low VT <sup>1</sup>H NMR spectra of **10** in CDCl<sub>3</sub>.

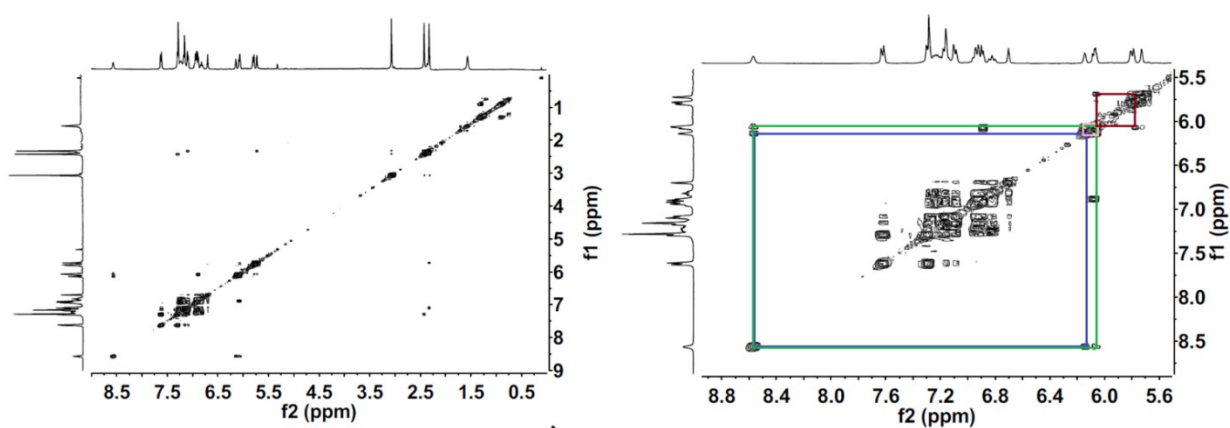

Fig.

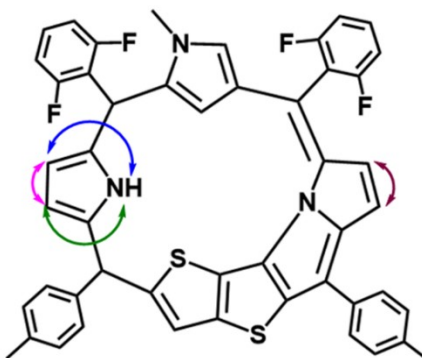

S36 <sup>1</sup>H-<sup>1</sup>H 2D COSY NMR spectra of **10** in CDCl<sub>3</sub> at 298 K.

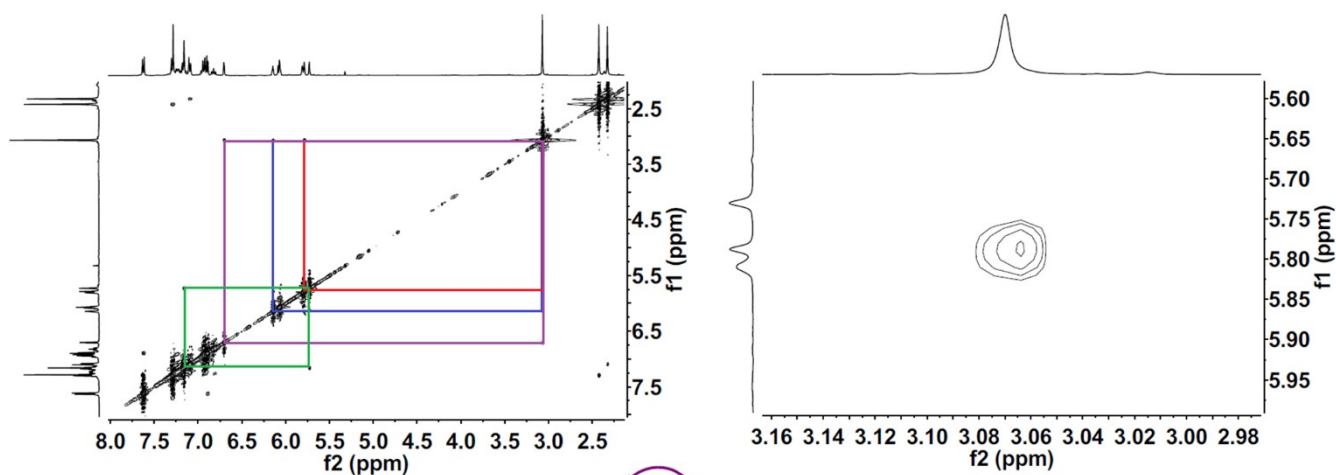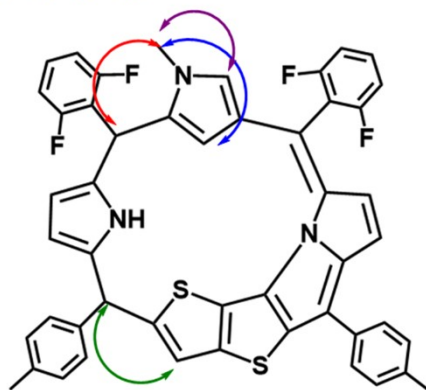

Fig. S37  $^1\text{H}$ - $^1\text{H}$  2D ROESY NMR spectra of **10** in  $\text{CDCl}_3$  at 298 K.

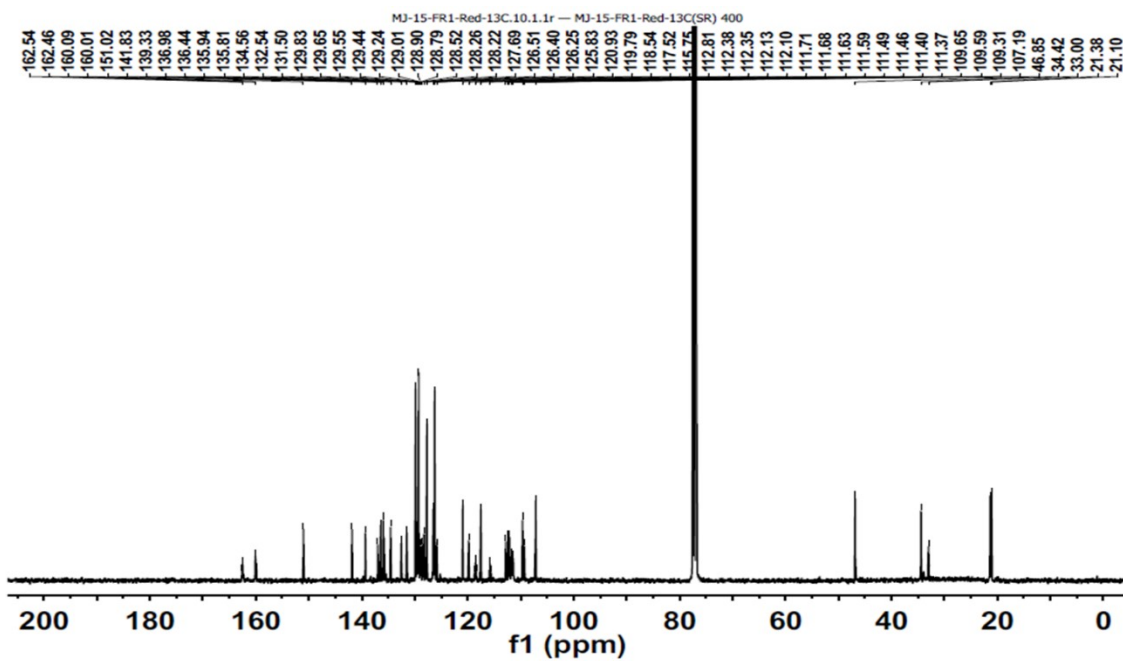

Fig. S38  $^{13}\text{C}$  NMR spectra of **10** in  $\text{CDCl}_3$  at 298 K.

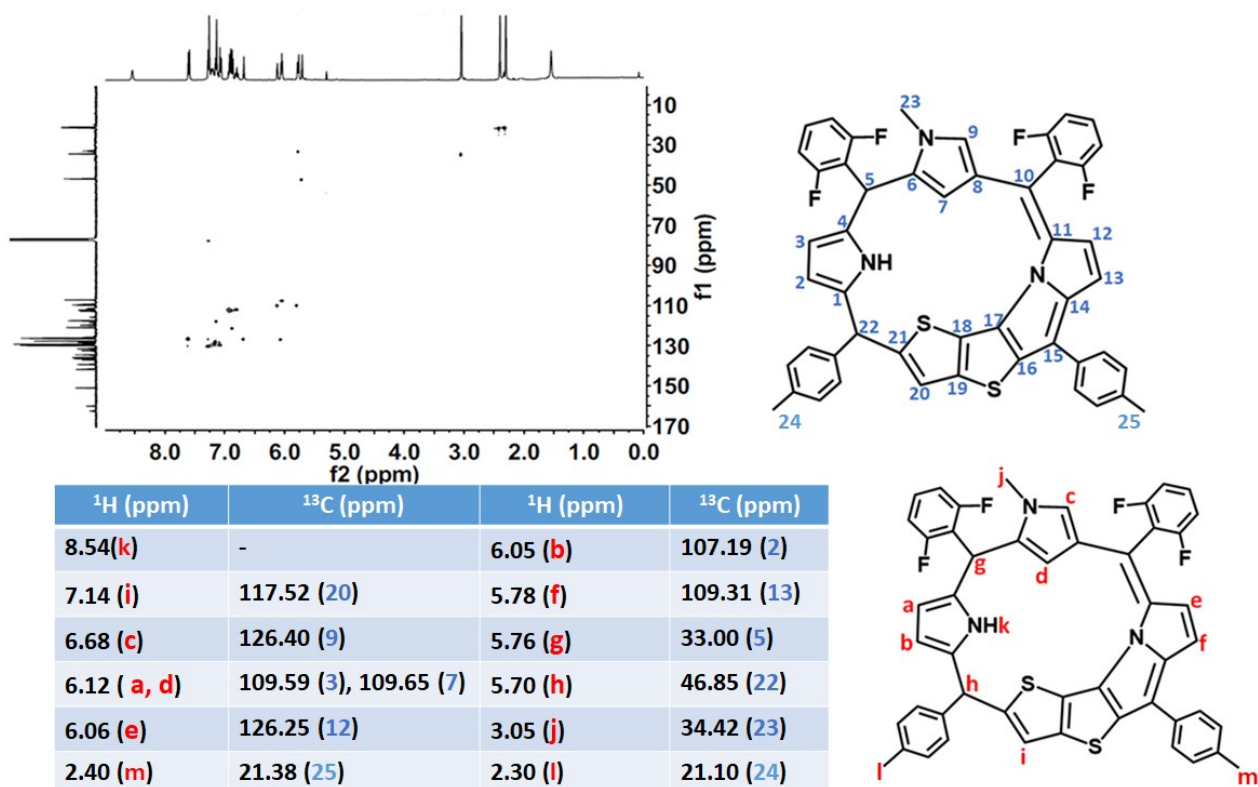

Fig. S39 <sup>13</sup>C-<sup>1</sup>H 2D HSQC NMR spectra of **10** in CDCl<sub>3</sub> at 298 K.

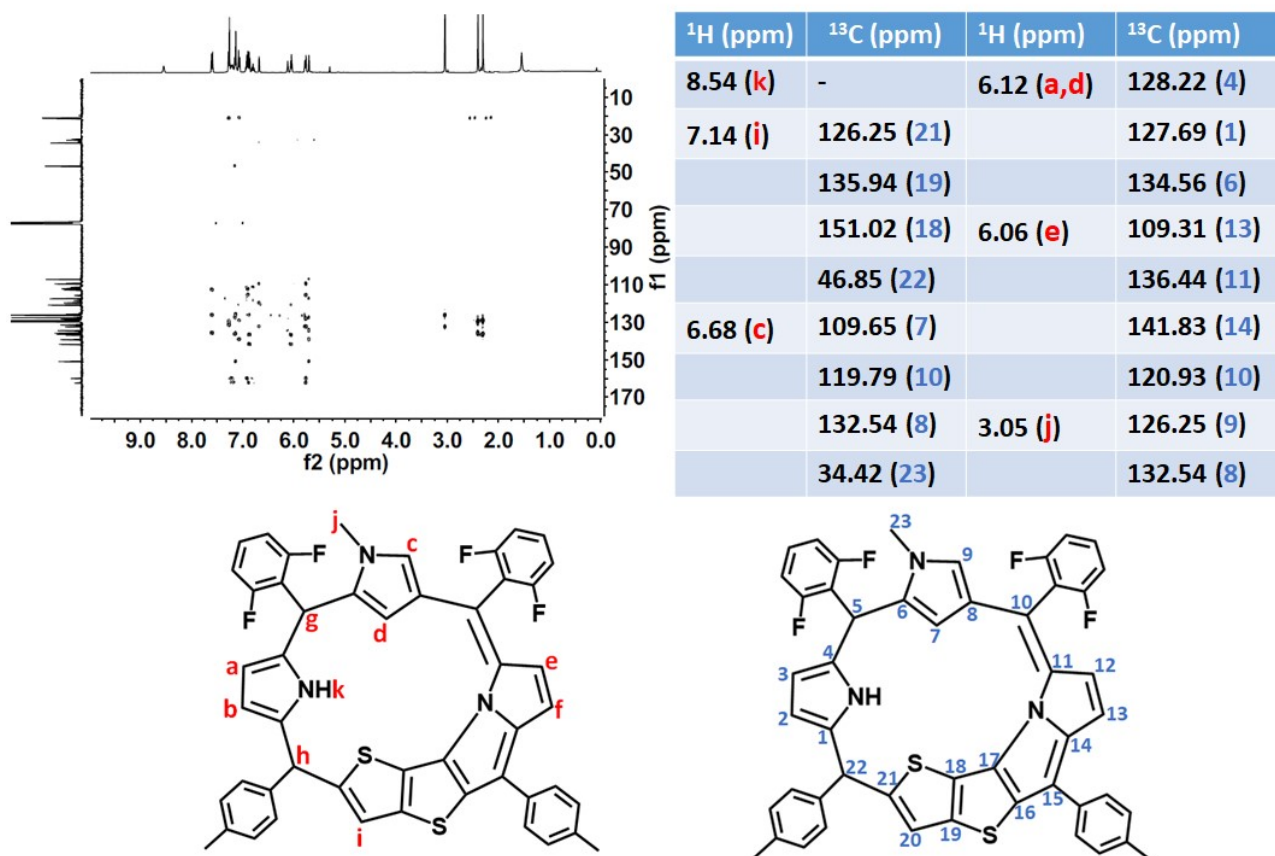

Fig. S40 <sup>13</sup>C-<sup>1</sup>H 2D HMBC NMR spectra of **10** in CDCl<sub>3</sub> at 298 K.

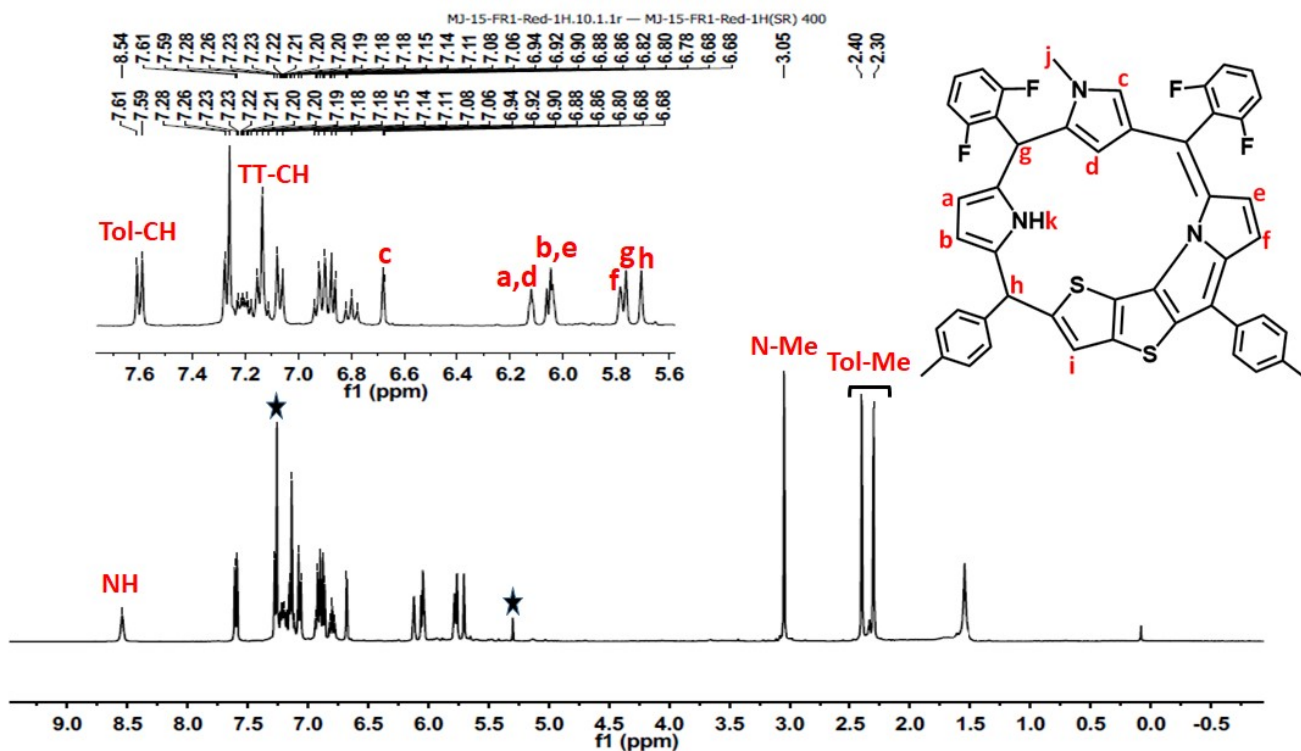

Fig. S41 Completely assigned  $^1\text{H}$  NMR spectra of **10** in  $\text{CDCl}_3$  at 298 K.

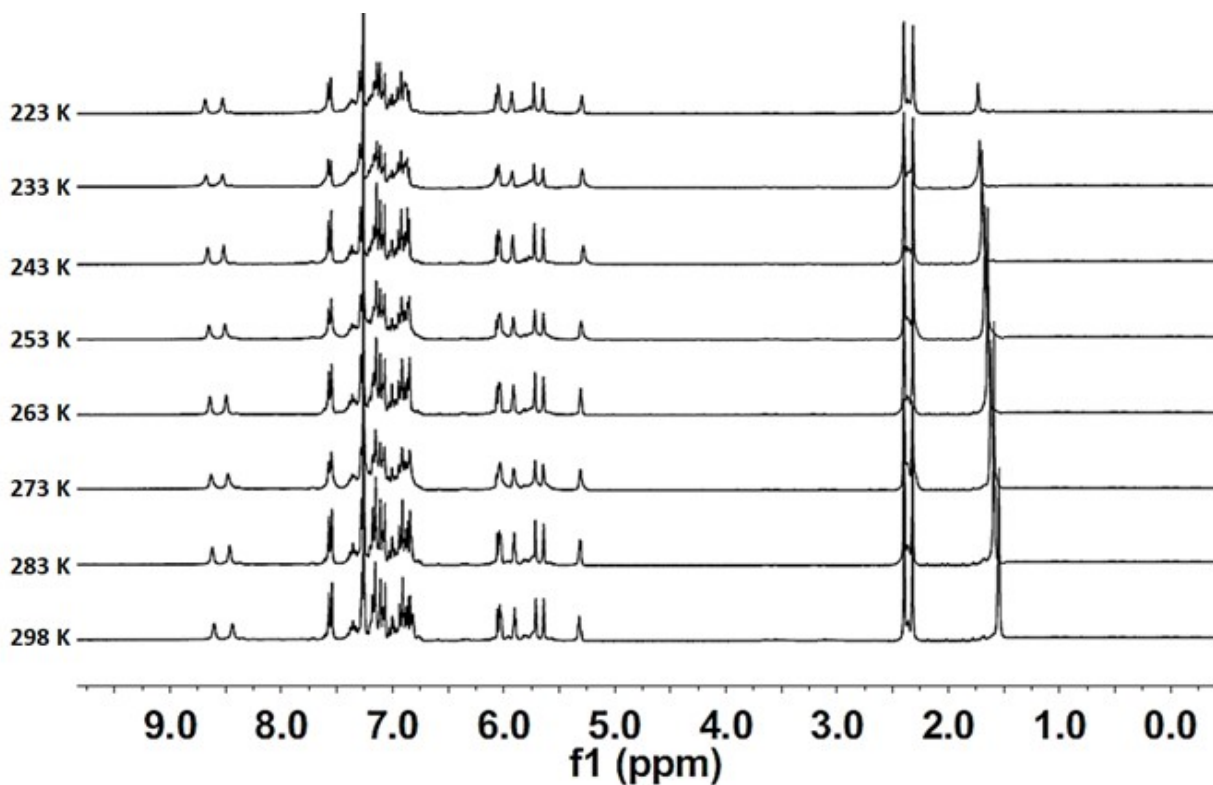

Fig. S42 Low VT  $^1\text{H}$  NMR spectra of **11** in  $\text{CDCl}_3$ .



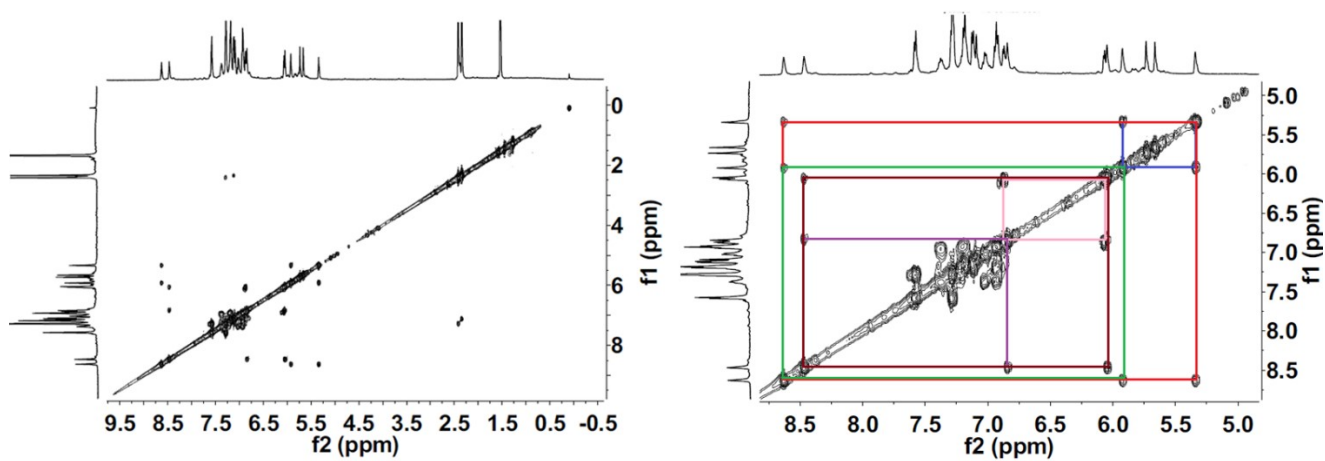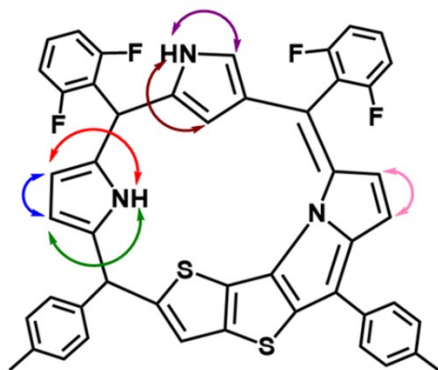

**Fig. S43**  $^1\text{H}$ - $^1\text{H}$  2D COSY NMR spectra of **11** in  $\text{CDCl}_3$  at 298 K.

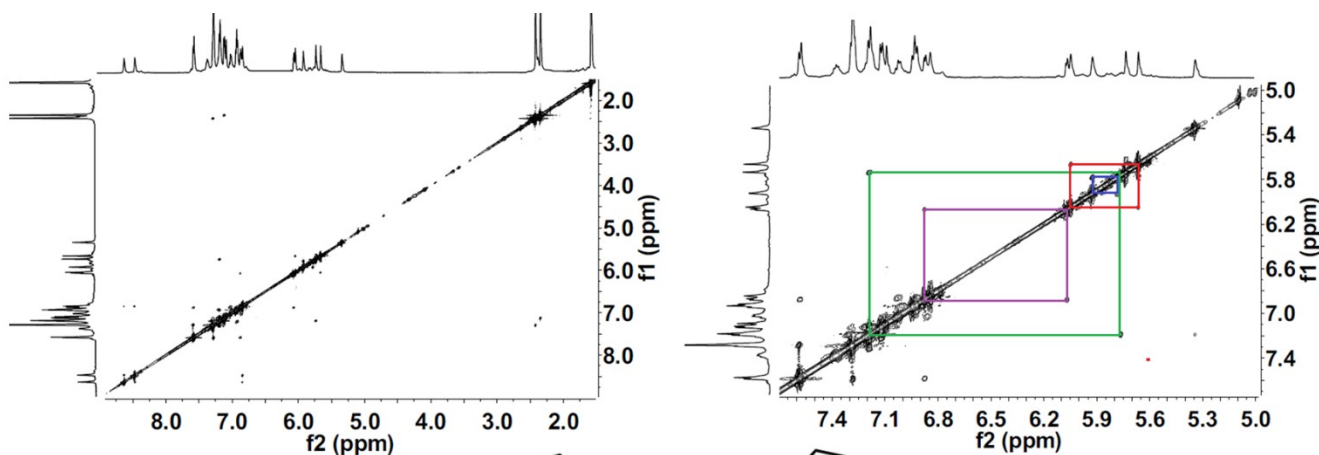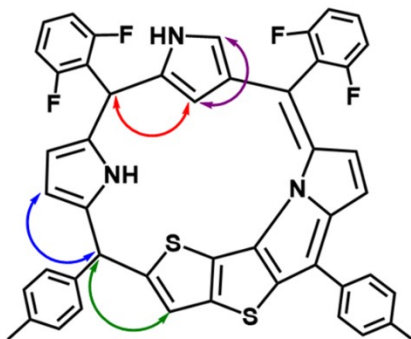

**Fig. S44**  $^1\text{H}$ - $^1\text{H}$  2D ROESY NMR spectra of **11** in  $\text{CDCl}_3$  at 298 K.

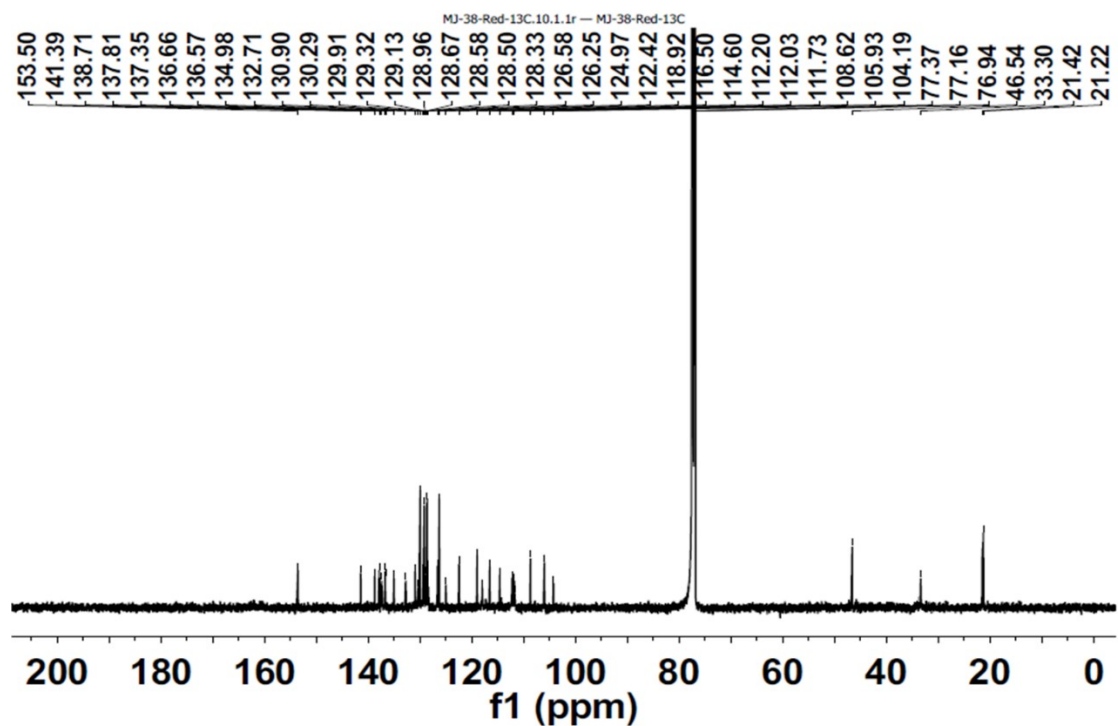

Fig. S45  $^{13}\text{C}$  NMR spectra of **11** in  $\text{CDCl}_3$  at 298 K.

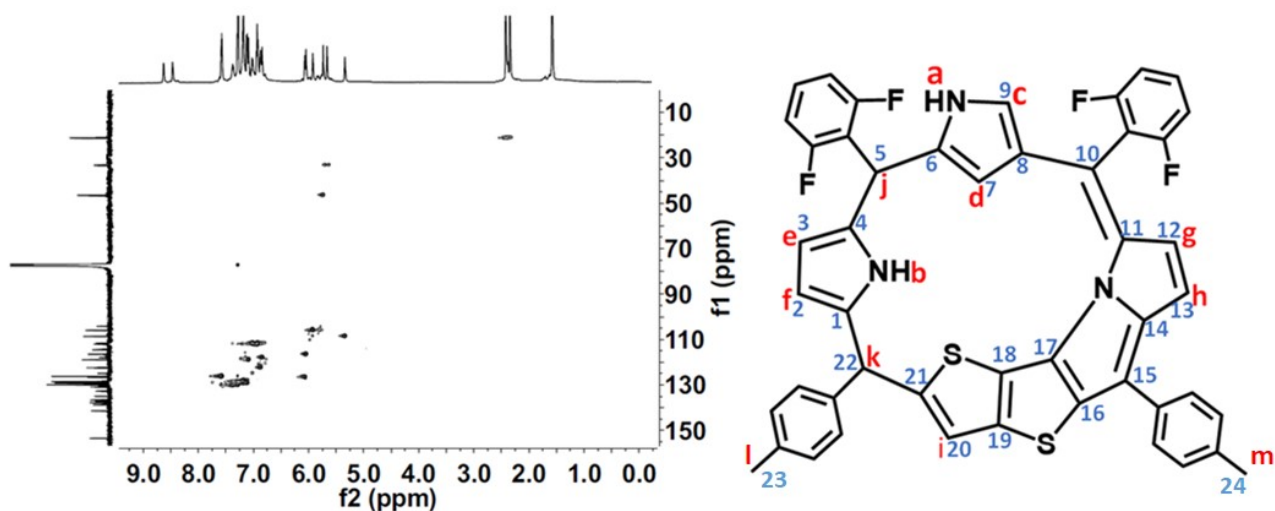

| $^1\text{H}$ (ppm) | $^{13}\text{C}$ (ppm) | $^1\text{H}$ (ppm) | $^{13}\text{C}$ (ppm) | $^1\text{H}$ (ppm) | $^{13}\text{C}$ (ppm) |
|--------------------|-----------------------|--------------------|-----------------------|--------------------|-----------------------|
| 8.46 (a)           | -                     | 5.92 (f)           | 105.93 (2)            | 5.73 (k)           | 46.54 (22)            |
| 8.63 (b)           | -                     | 6.87 (g)           | 122.42 (12)           | 2.42 (m)           | 21.42 (24)            |
| 6.84 (c)           | 118.92 (9)            | 6.06 (h)           | 126.25 (13)           | 2.35 (l)           | 21.22 (23)            |
| 6.04 (d)           | 116.50 (7)            | 7.18 (i)           | 128.33 (20)           |                    |                       |
| 5.34 (e)           | 108.62 (3)            | 5.66 (j)           | 33.30 (5)             |                    |                       |

Fig. S46  $^1\text{H}$ - $^{13}\text{C}$  2D HSQC NMR spectra of **11** in  $\text{CDCl}_3$  at 298 K.

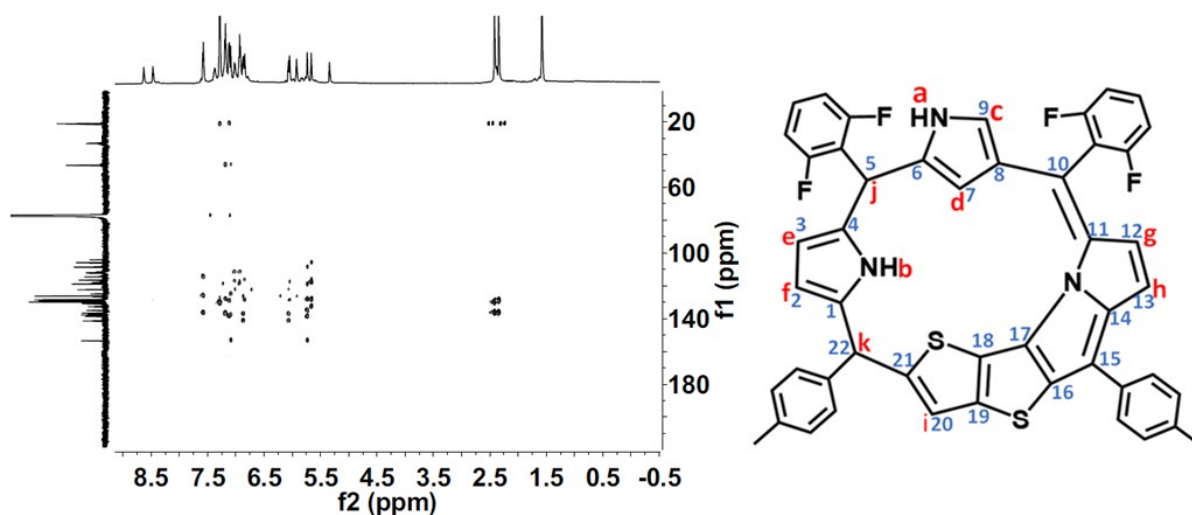

| $^1\text{H}$ (ppm) | $^{13}\text{C}$ (ppm) |
|--------------------|-----------------------|--------------------|-----------------------|--------------------|-----------------------|--------------------|-----------------------|
| 6.84 (c)           | 116.50 (7)            | 5.66 (j)           | 108.62 (3)            | 7.18 (i)           | 46.54 (22)            | 5.73 (k)           | 105.93 (2)            |
|                    | 118.92 (9)            |                    | 117.93 (4)            |                    | 126.58(21)            |                    | 117.99 (1)            |
|                    | 136.66 (8)            |                    | 116.50 (7)            |                    | 136.57(19)            |                    | 128.33(20)            |
|                    | 141.39(10)            |                    | 137.35 (6)            | 6.07 (h)           | 136.66(14)            |                    | 132.71(19)            |
| 6.04(d)            | 137.35 (6)            | 6.87(g)            | 136.66(14)            |                    | 141.39(10)            |                    |                       |
|                    | 141.39(10)            |                    | 141.39(10)            |                    |                       |                    |                       |

Fig. S47  $^1\text{H}$ - $^{13}\text{C}$  2D HMBC NMR spectra of **11** in  $\text{CDCl}_3$  at 298 K.

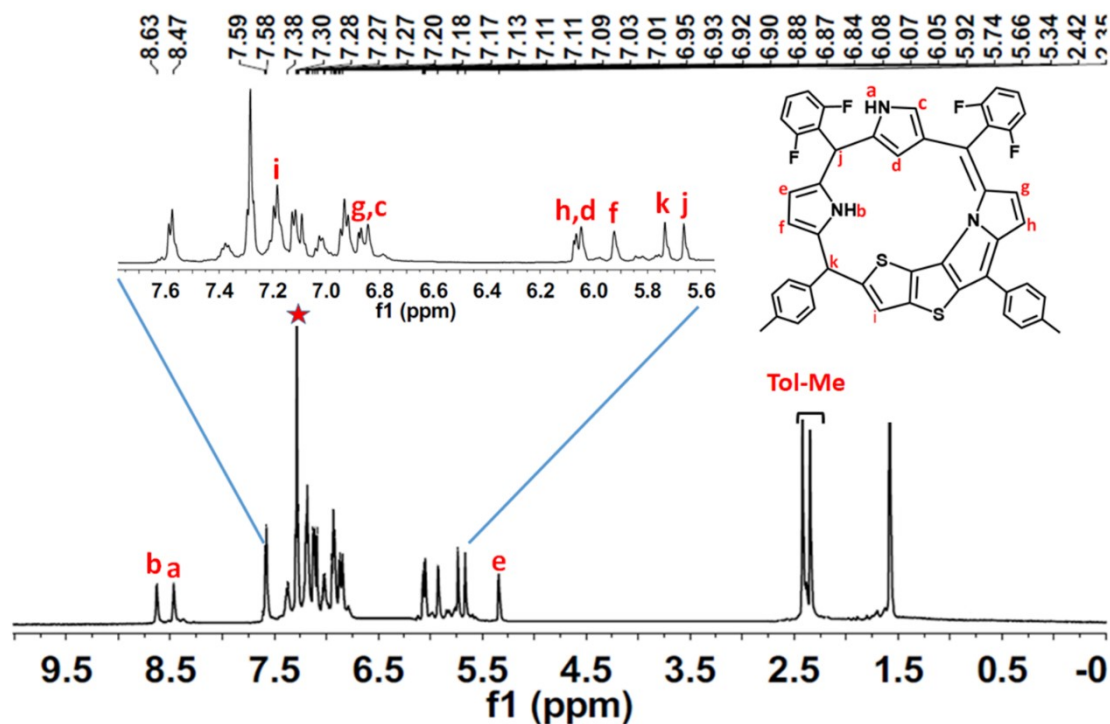

Fig. S48 Completely assigned  $^1\text{H}$  NMR spectra of **11** in  $\text{CDCl}_3$  at 298 K.



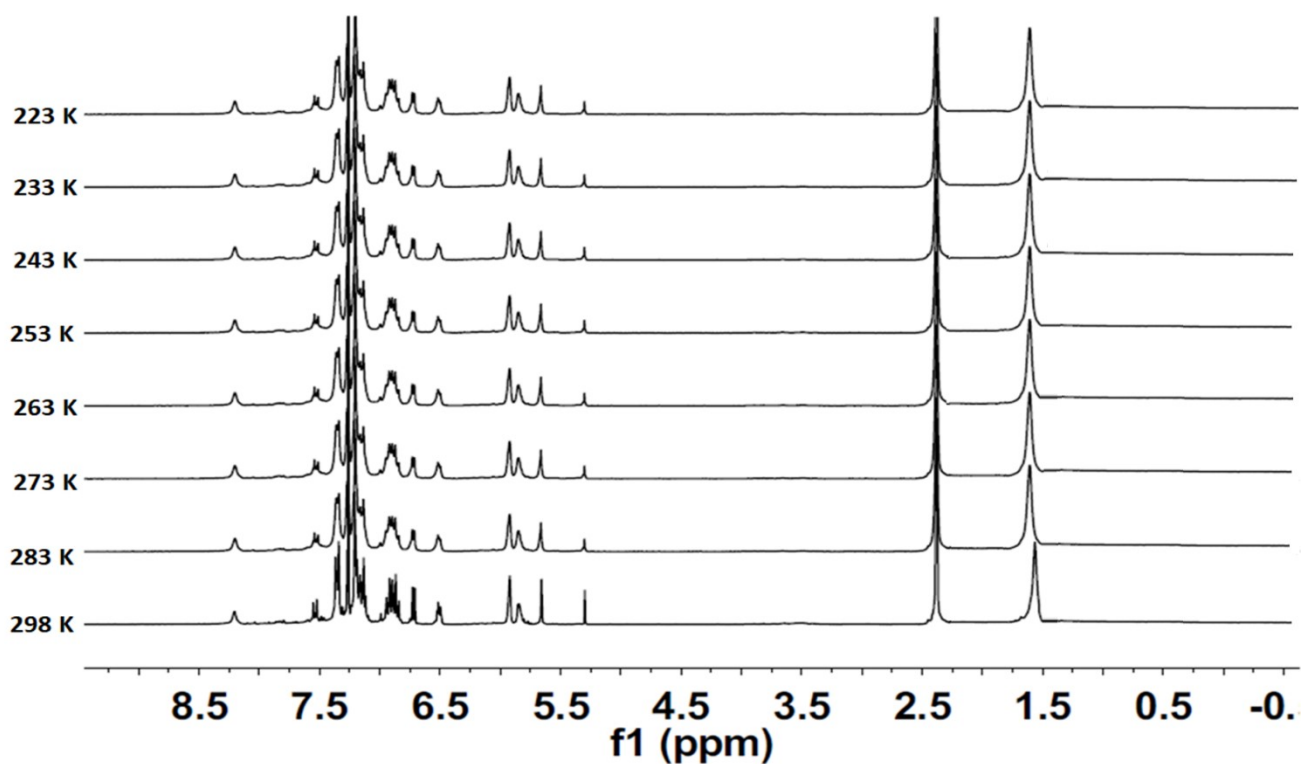

Fig. S49 Low VT  $^1\text{H}$  NMR spectra of **12** in  $\text{CDCl}_3$ .

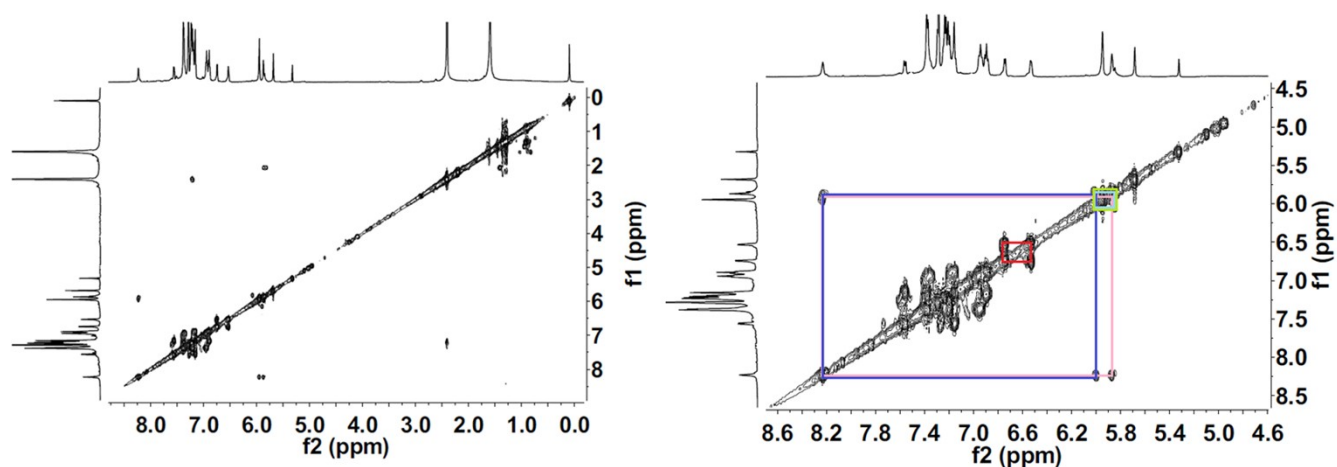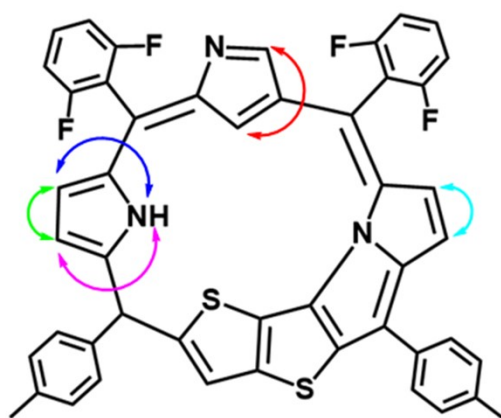

Fig. S50  $^1\text{H}$ - $^1\text{H}$  2D COSY NMR spectra of **12** in  $\text{CDCl}_3$  at 298 K.

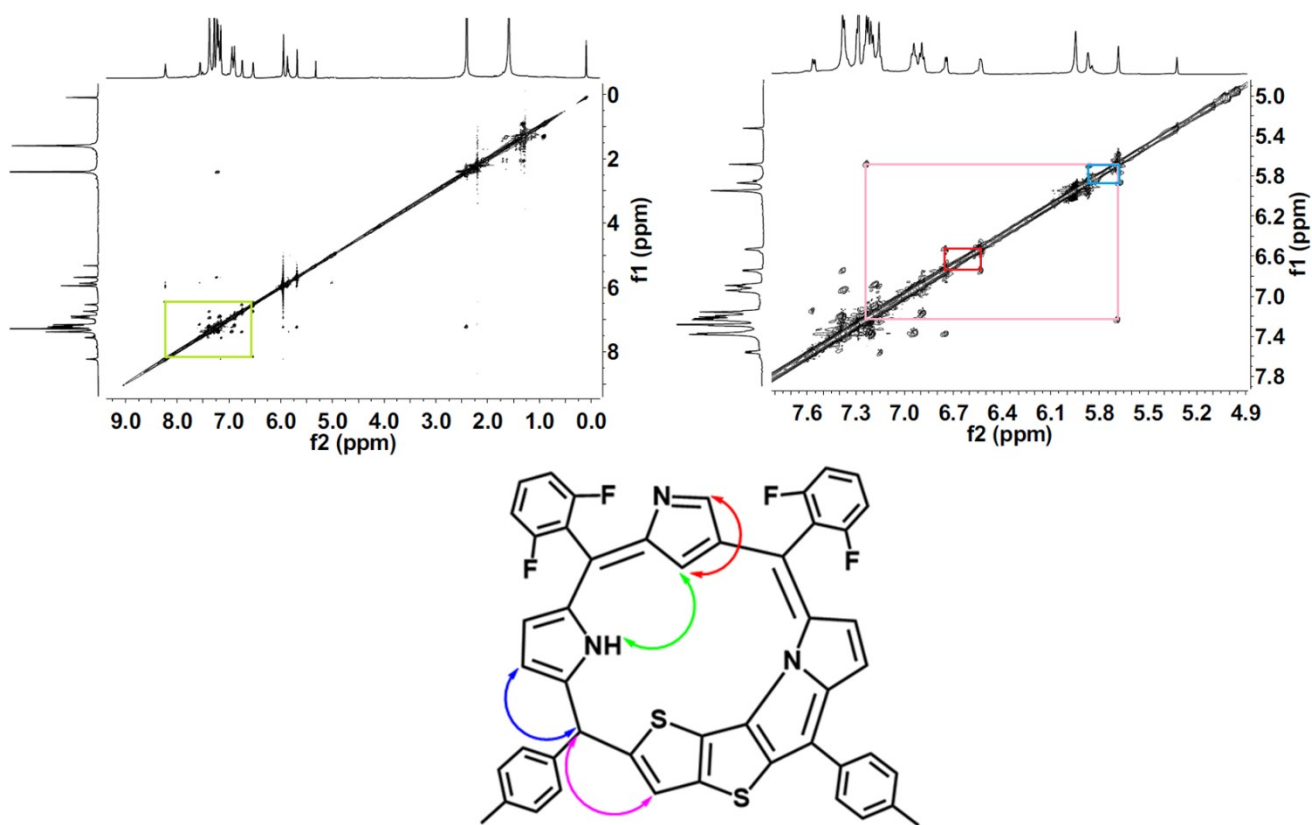

Fig. S51  $^1\text{H}$ - $^1\text{H}$  2D ROESY NMR spectra of **12** in  $\text{CDCl}_3$  at 298 K.

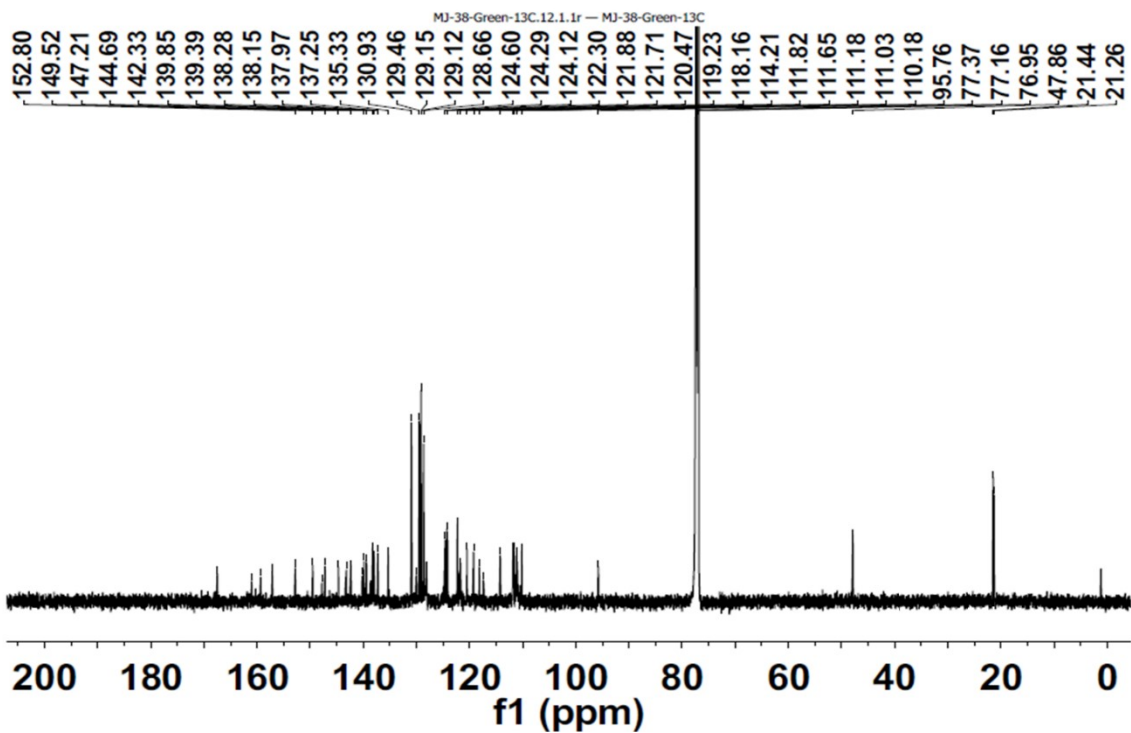

Fig. S52  $^{13}\text{C}$  NMR spectra of **12** in  $\text{CDCl}_3$  at 298 K.

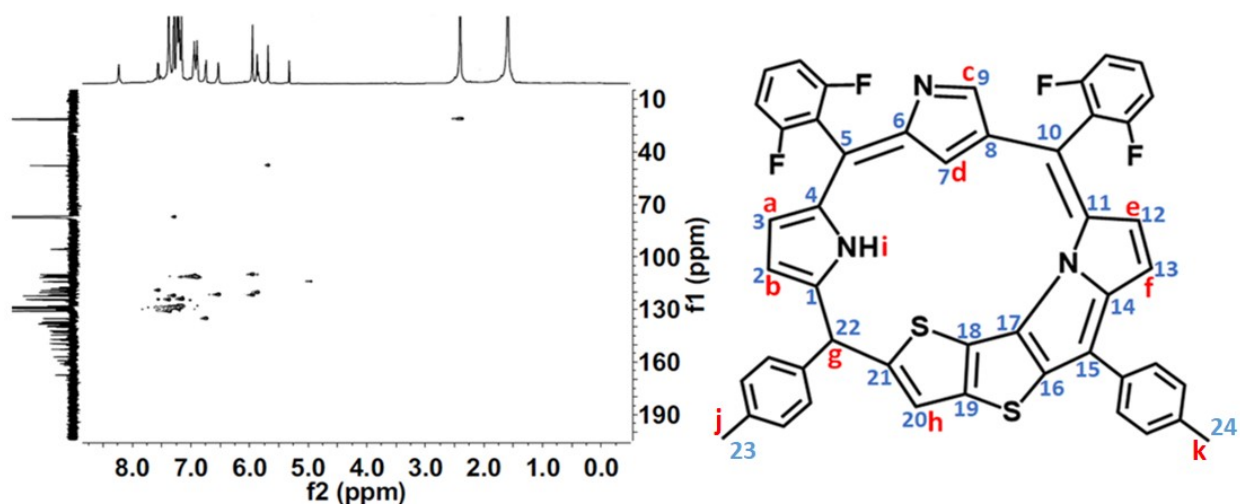

| <sup>1</sup> H (ppm) | <sup>13</sup> C (ppm)  | <sup>1</sup> H (ppm) | <sup>13</sup> C (ppm) |
|----------------------|------------------------|----------------------|-----------------------|
| 8.23 (i)             | -                      | 5.87 (f)             | 120.47 (13)           |
| 7.16 (h)             | 124.12 (20)            | 5.85 (b)             | 110.03 (2)            |
| 6.75 (c)             | 135.33 (9)             | 5.68 (g)             | 47.86 (22)            |
| 5.95 (a, e)          | 110.18 (3), 121.88(12) | 6.53 (d)             | 121.71 (7)            |
| 2.40-2.41 (j, k)     | 21.44 (24), 21.26 (23) |                      |                       |

Fig. S53 <sup>1</sup>H-<sup>13</sup>C 2D HSQC NMR spectra of **12** in CDCl<sub>3</sub> at 298 K.

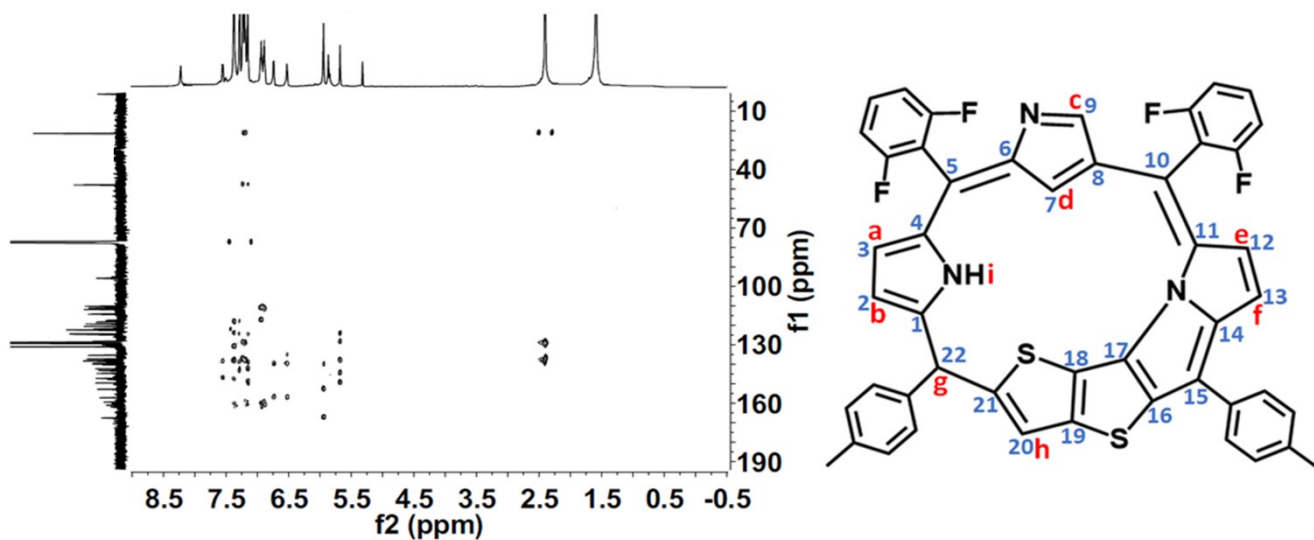

| <sup>1</sup> H (ppm) | <sup>13</sup> C (ppm) | <sup>1</sup> H (ppm) | <sup>13</sup> C (ppm) |
|----------------------|-----------------------|----------------------|-----------------------|
| 7.16 (h)             | 138.28 (21)           | 5.95 (a, e)          | 139.44 (10)           |
|                      | 142.33 (18)           |                      | 110.03 (2)            |
|                      | 149.52 (19)           |                      | 128.14 (1)            |
| 6.75 (c)             | 121.71 (7)            | 5.68 (g)             | 124.12 (20)           |
|                      | 139.44 (10)           |                      | 128.14 (1)            |
| 6.53 (d)             | 135.33 (9)            |                      | 138.28 (21)           |
|                      | 139.44 (10)           |                      | 149.52 (19)           |

Fig. S54 <sup>1</sup>H-<sup>13</sup>C 2D HMBC NMR spectra of **12** in CDCl<sub>3</sub> at 298 K.

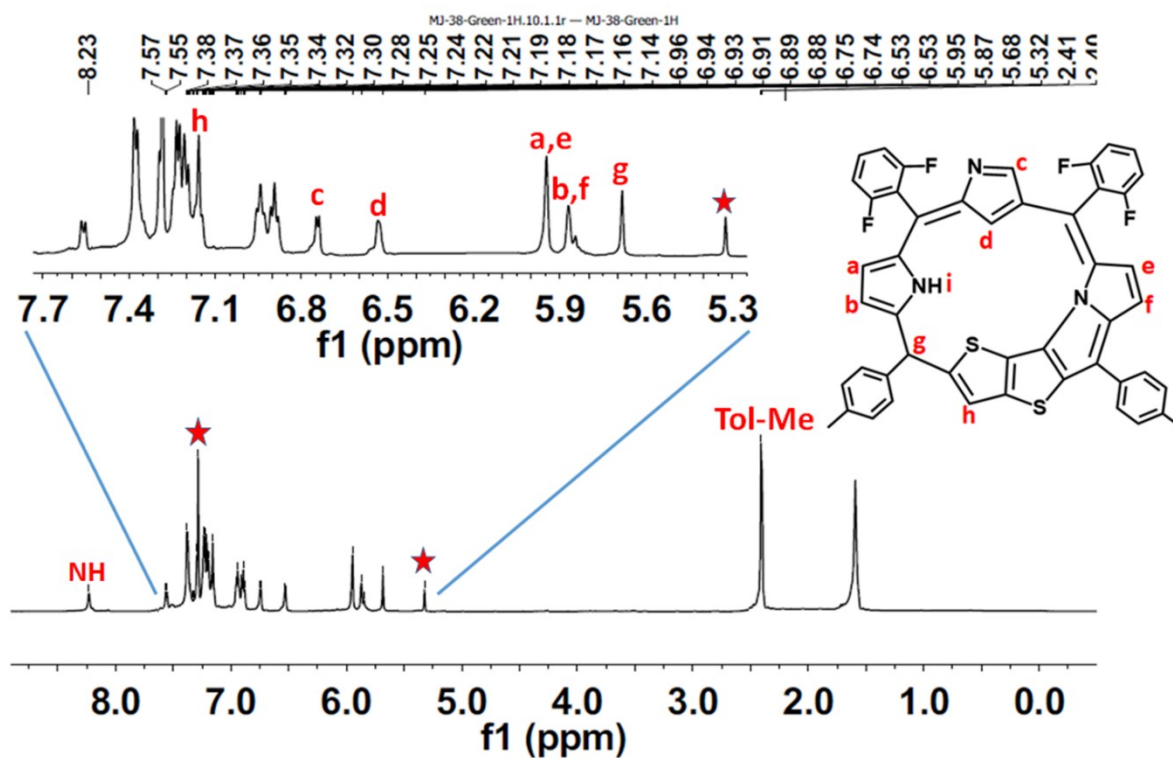

Fig. S55 Completely assigned  $^1\text{H}$  NMR spectra of **12** in  $\text{CDCl}_3$  at 263 K.

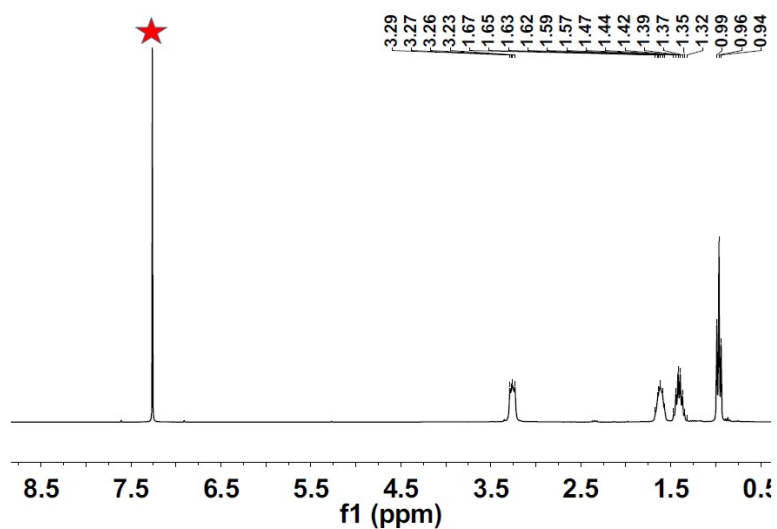

Fig. S56  $^1\text{H}$  NMR spectral pattern of TBAF in  $\text{CDCl}_3$  at 298 K.

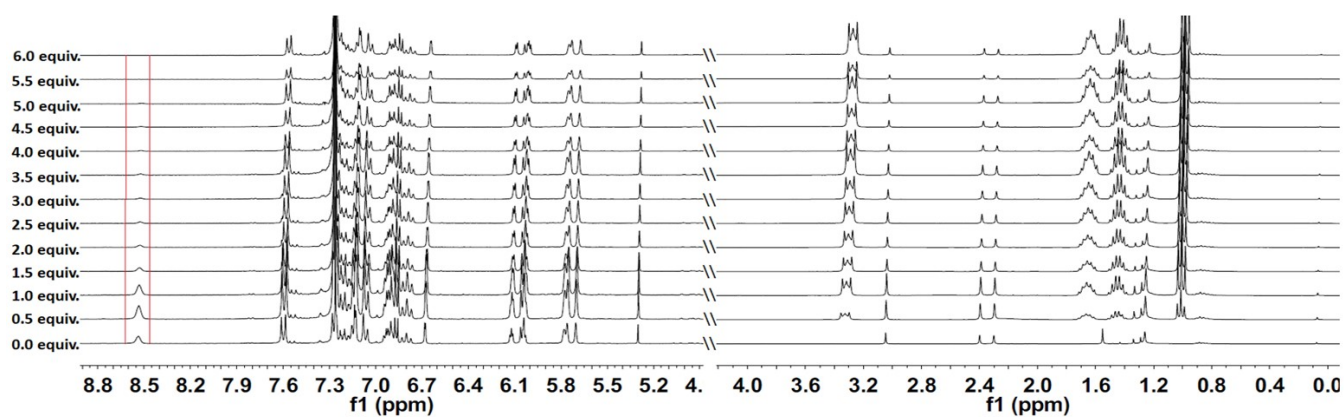

**Fig. S57**  $^1\text{H}$  NMR spectral pattern observed upon addition of TBAF (0.5 M) to **10** ( $1 \times 10^{-2}$  M) in  $\text{CDCl}_3$  at 298 K.

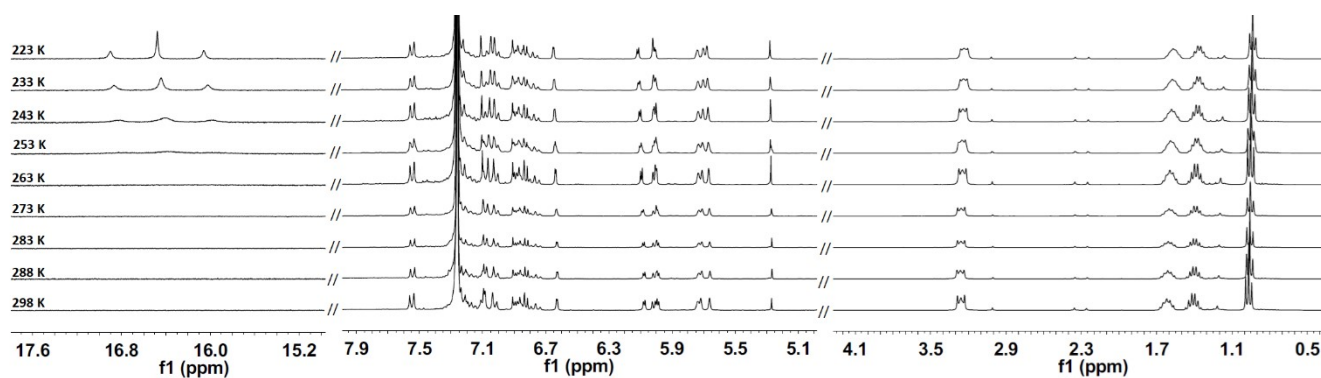

**Fig. S58** Low VT  $^1\text{H}$  NMR spectral pattern observed upon addition of TBAF (1.07 M) to **10** ( $1 \times 10^{-2}$  M) in  $\text{CDCl}_3$ .

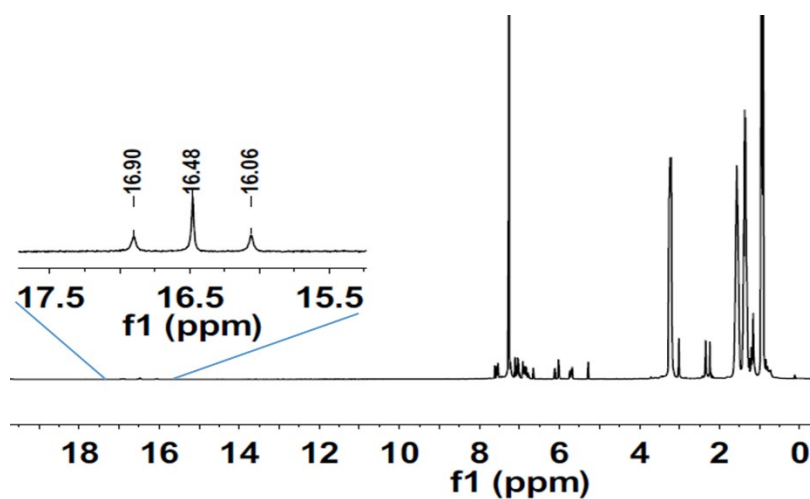

**Fig. S59**  $^1\text{H}$  NMR spectral pattern observed upon addition of TBAF (0.5 M) to **10** ( $1 \times 10^{-2}$  M) in  $\text{CDCl}_3$  at 223 K.



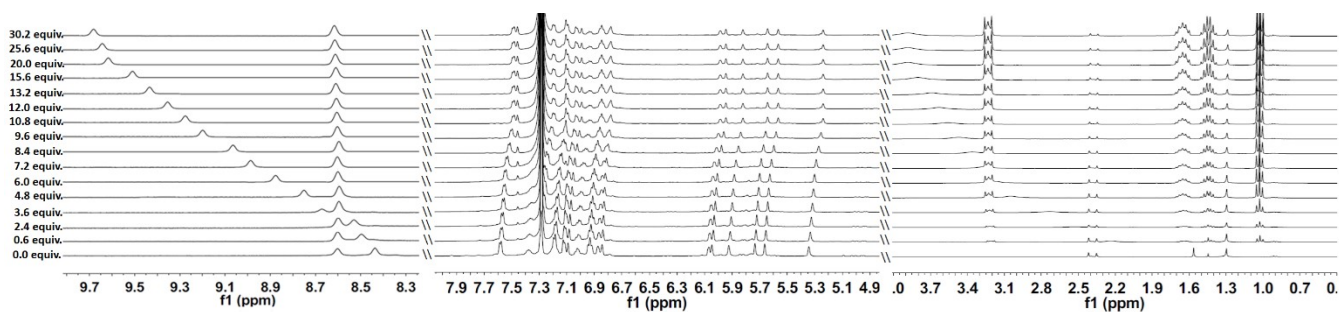

**Fig. S60**  $^1\text{H}$  NMR spectral pattern observed upon addition of TBAF (0.5 M) to **11** ( $1 \times 10^{-2}$  M) in  $\text{CDCl}_3$  at 298 K.

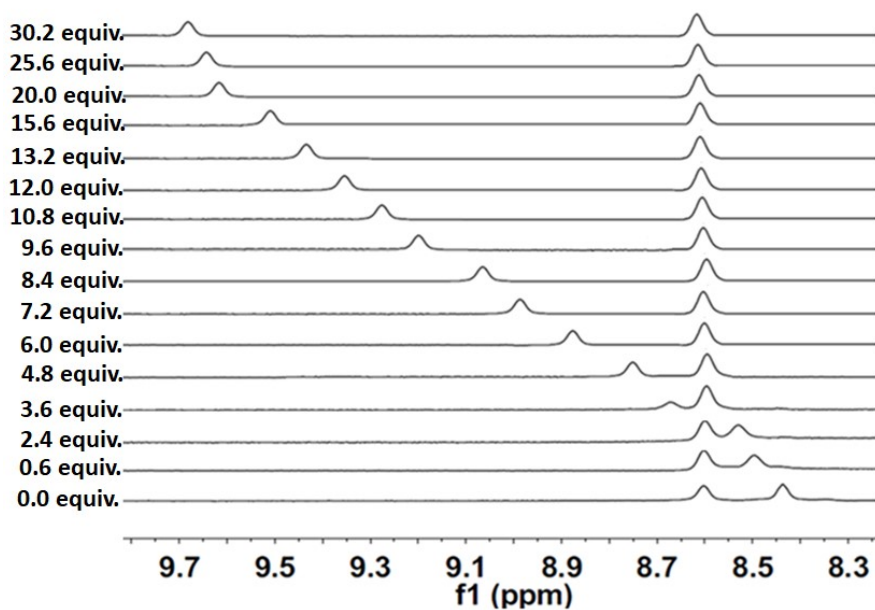

**Fig. S60A**  $^1\text{H}$  NMR spectral pattern observed upon addition of TBAF (1.07 M) to **11** ( $1 \times 10^{-2}$  M) in  $\text{CDCl}_3$  at 298 K in deshielded region.

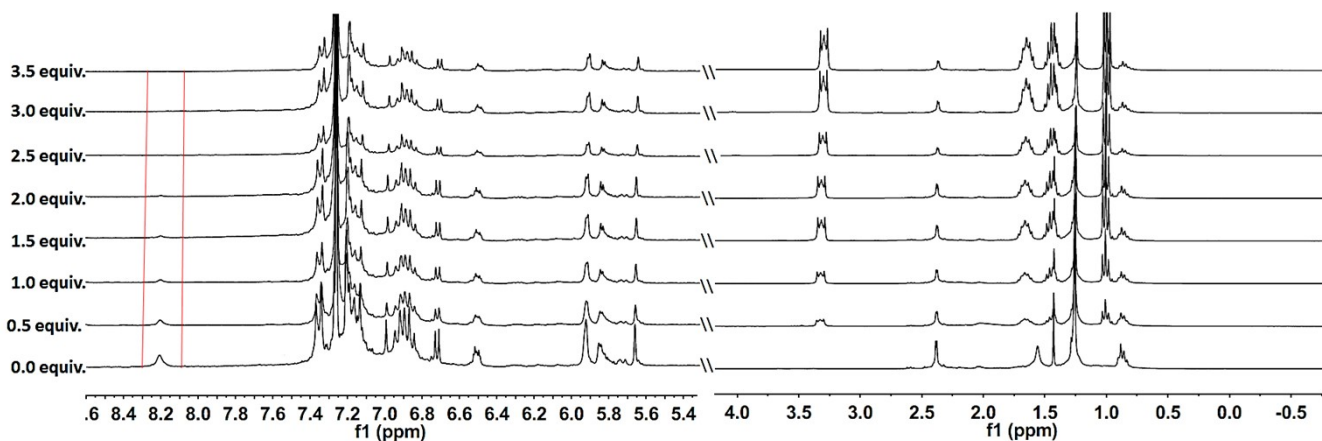

**Fig. S61**  $^1\text{H}$  NMR spectral pattern observed upon addition of TBAF (0.5 M) to **12** ( $1 \times 10^{-2}$  M) in  $\text{CDCl}_3$  at 298 K.

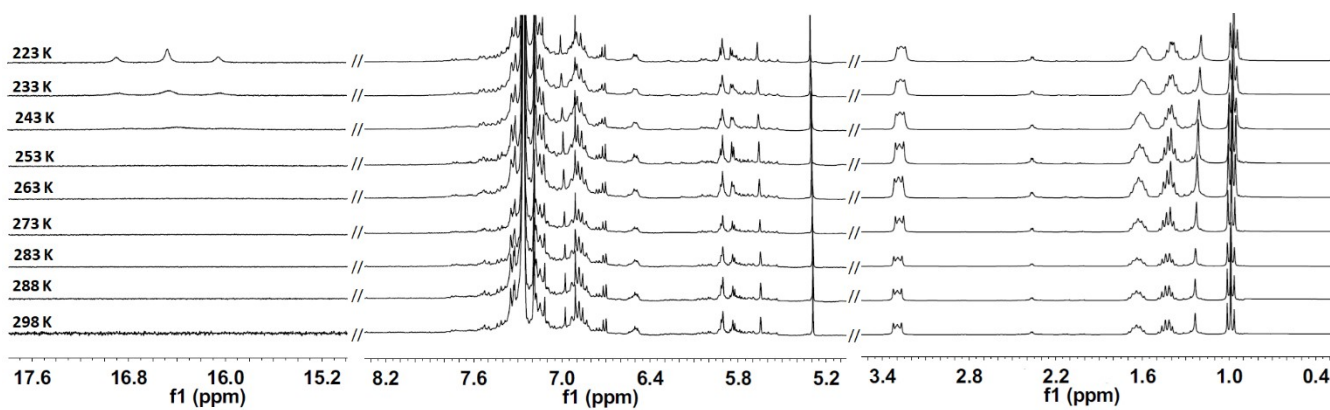

Fig. S62 Low VT  $^1\text{H}$  NMR spectral pattern observed upon addition of TBAF to **12** in  $\text{CDCl}_3$ .

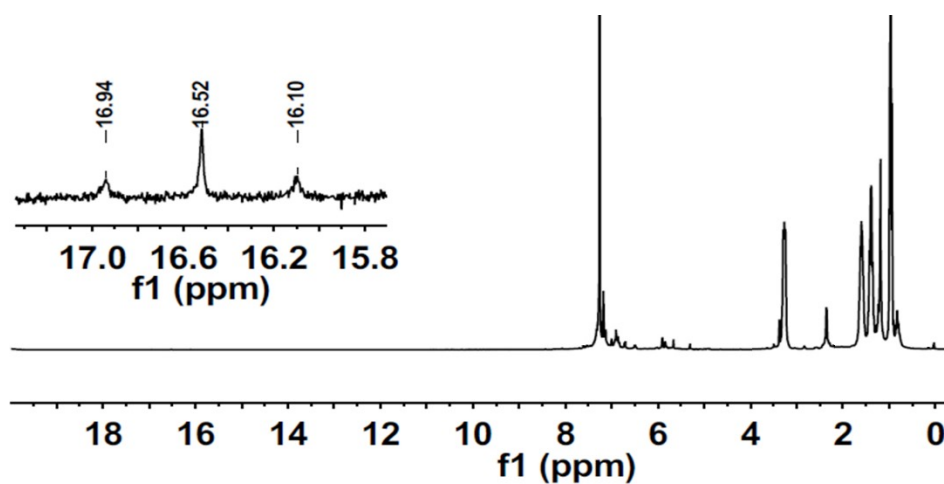

Fig. S63  $^1\text{H}$  NMR spectral pattern observed upon addition of TBAF to **12** in  $\text{CDCl}_3$  at 223 K.

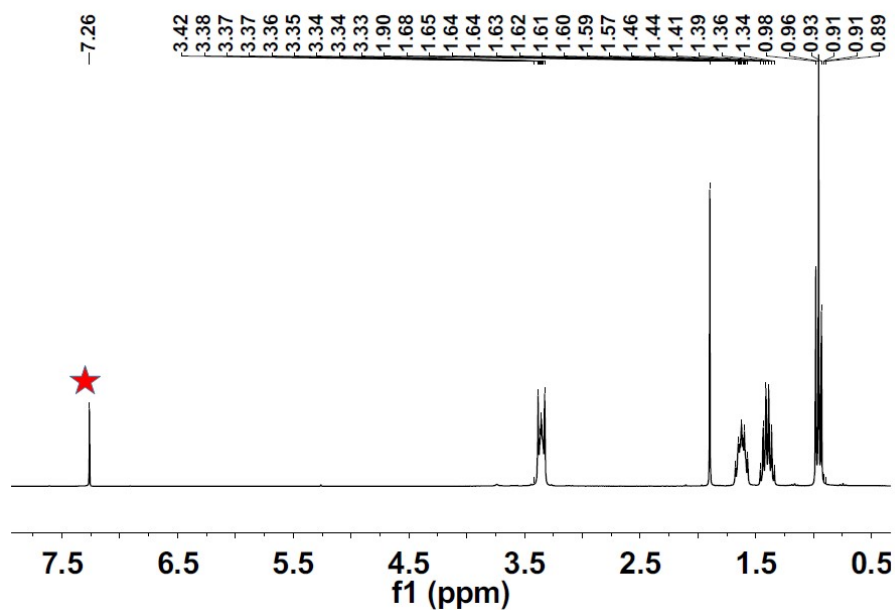

Fig. S64  $^1\text{H}$  NMR spectral pattern of TBAOAc in  $\text{CDCl}_3$  at 298 K.

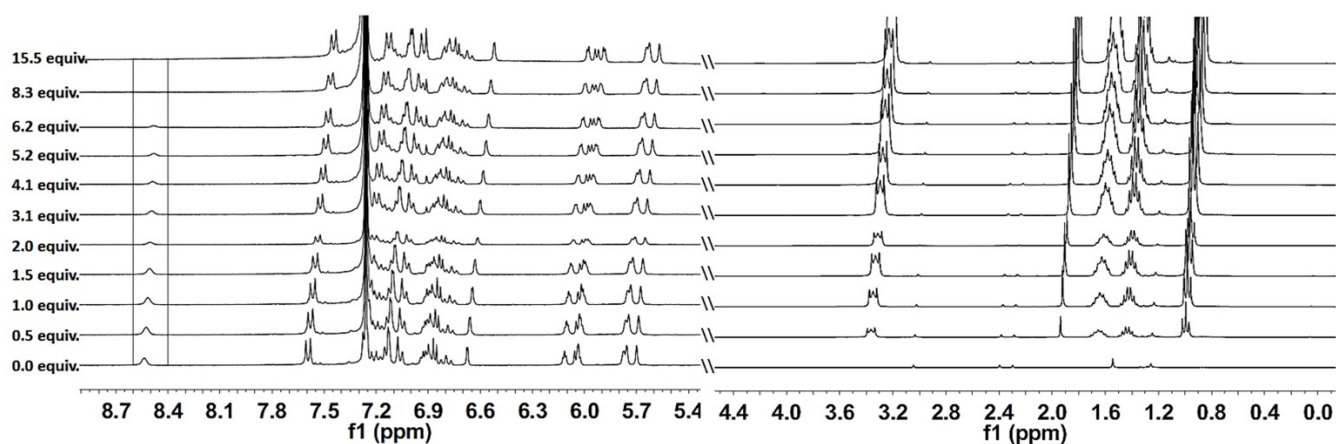

**Fig. S65**  $^1\text{H}$  NMR spectral pattern observed upon addition of TBAOAc (0.9 M) to **10** ( $1 \times 10^{-2}$  M) in  $\text{CDCl}_3$  at 298 K.

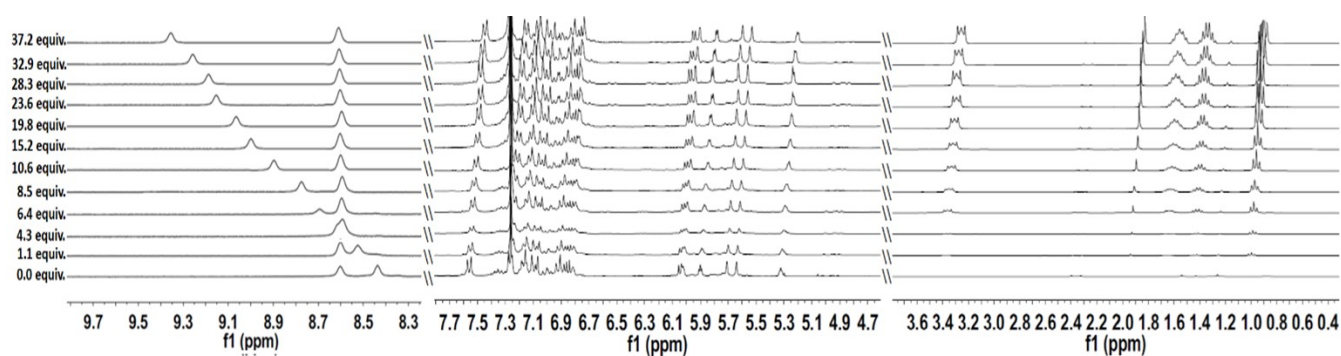

**Fig. S66**  $^1\text{H}$  NMR spectral pattern observed upon addition of TBAOAc (0.9 M) to **11** ( $1 \times 10^{-2}$  M) in  $\text{CDCl}_3$  at 298 K.

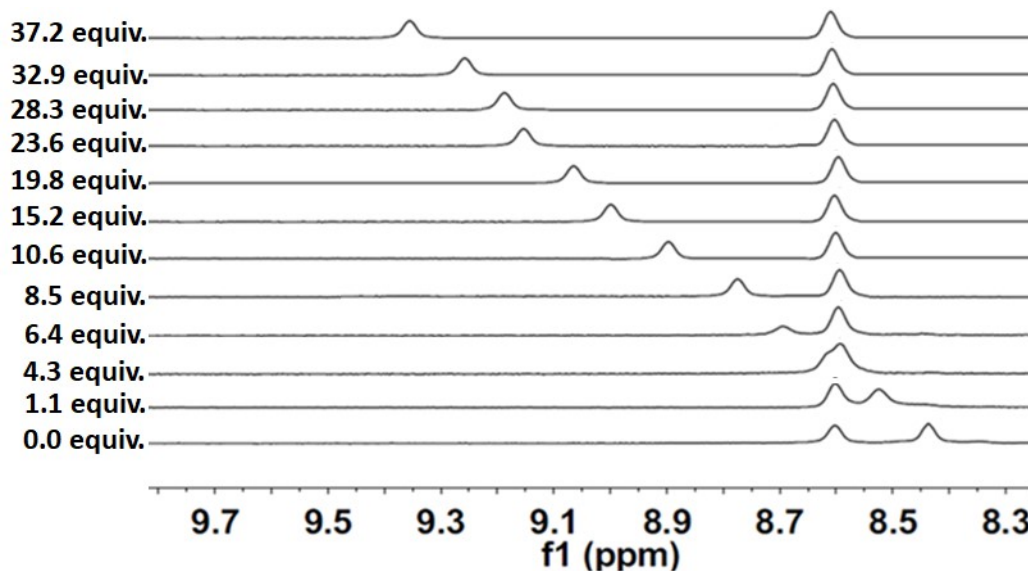

**Fig. S66A**  $^1\text{H}$  NMR spectral pattern observed upon addition of TBAOAc to **11** in  $\text{CDCl}_3$  at 298 K in the deshielded region.



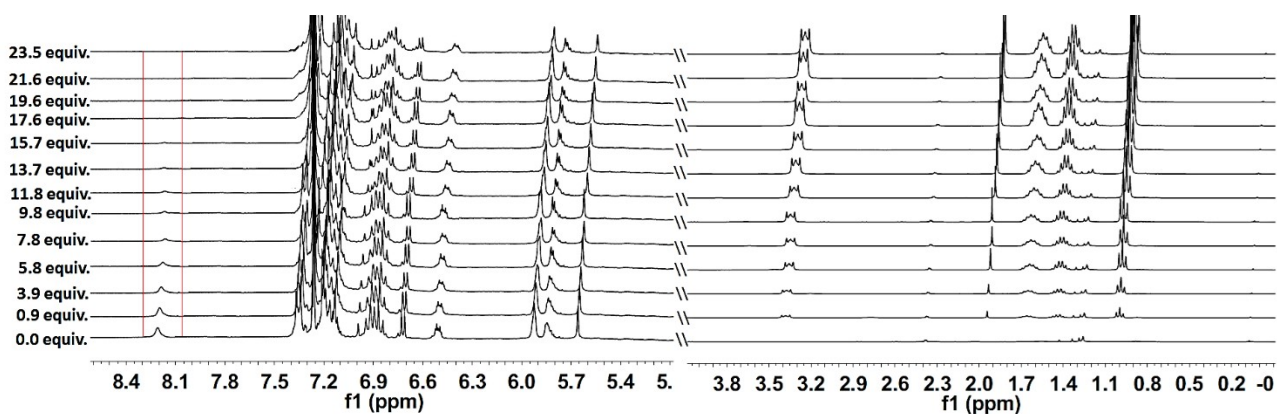

**Fig. S67**  $^1\text{H}$  NMR spectral pattern observed upon addition of TBAOAc (0.9 M) to **12** ( $1 \times 10^{-2}$  M) in  $\text{CDCl}_3$  at 298 K.

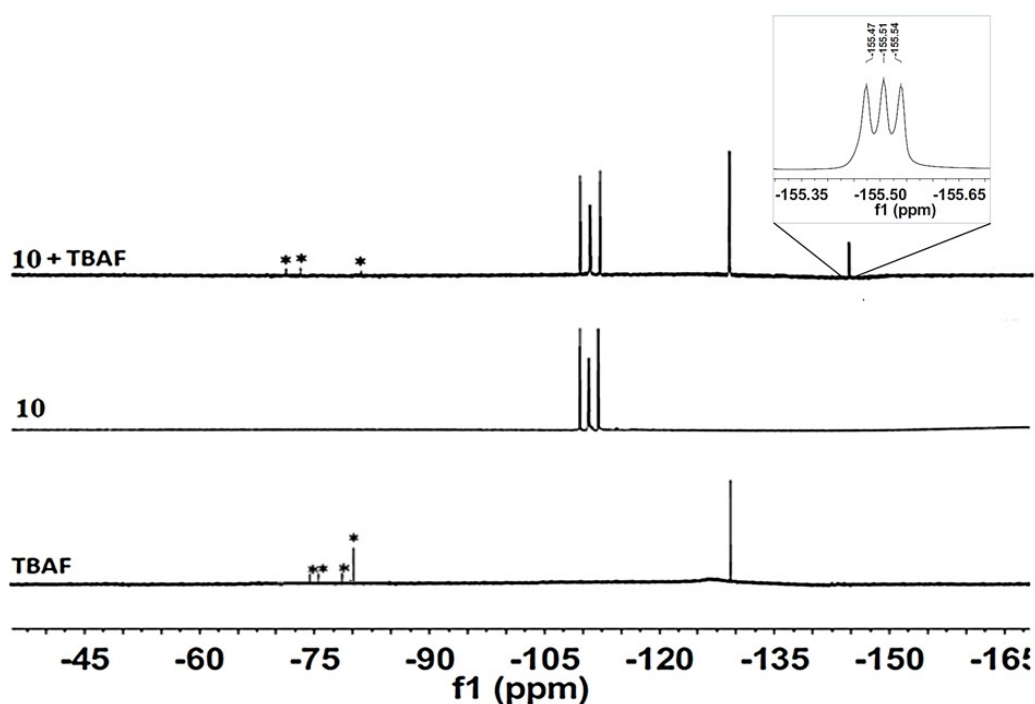

**Fig. S68** Comparative  $^{19}\text{F}$  NMR spectra for TBAF, **10** in  $\text{CDCl}_3$  at 298 K and after addition of TBAF (0.5 M) to **10** ( $1 \times 10^{-2}$  M) in  $\text{CDCl}_3$  at 223 K (\* at -80 to -40 ppm corresponds to unknown impurities in TBAF).

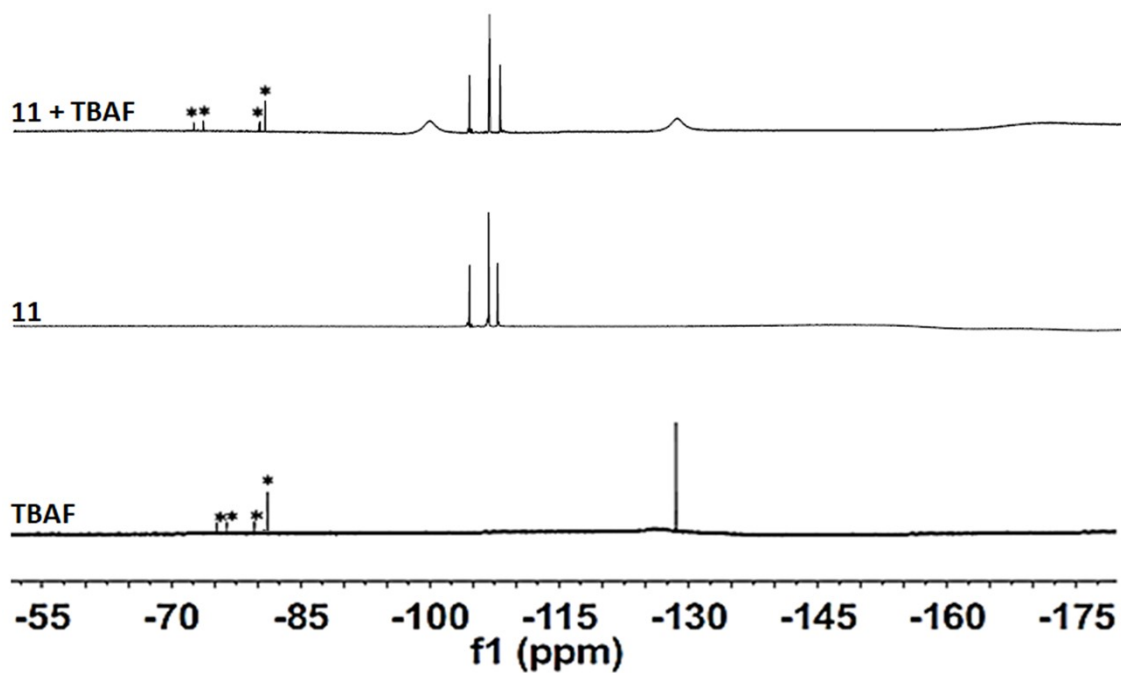

**Fig. S69** Comparative  $^{19}\text{F}$  NMR spectra for TBAF, **11** in  $\text{CDCl}_3$  at 298 K and after addition of TBAF (0.5 M) to **11** ( $1 \times 10^{-2}$  M) in  $\text{CDCl}_3$  at 298 K (\* at -80 to -40 ppm corresponds to unknown impurities in TBAF).

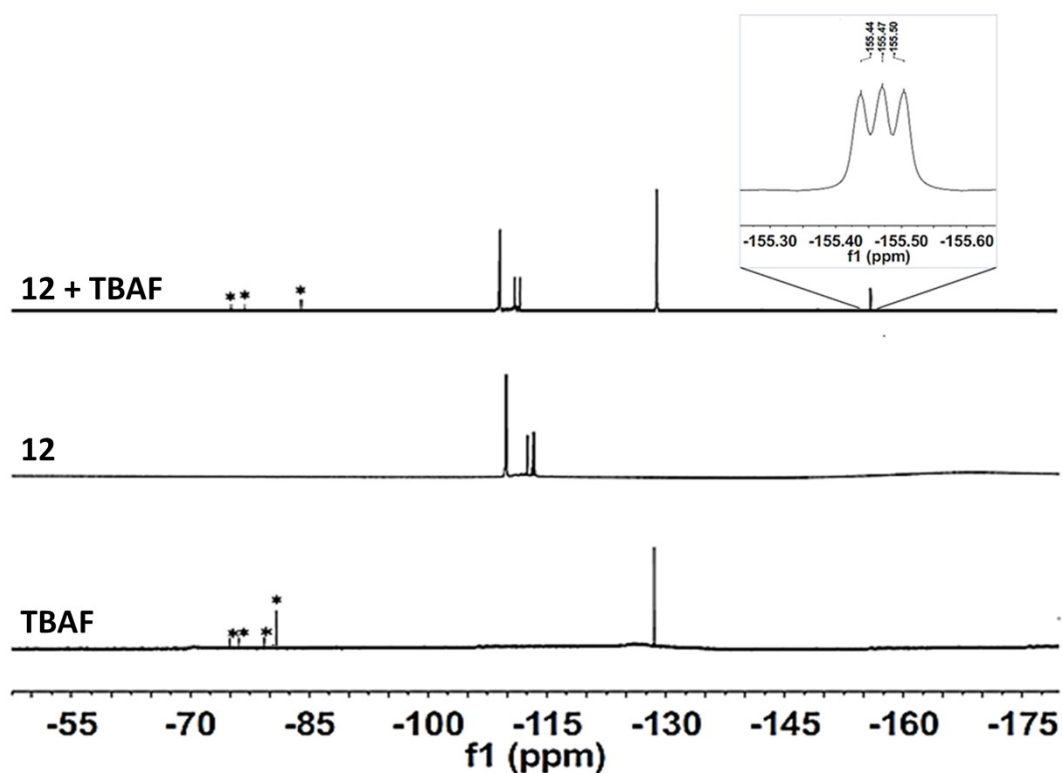

**Fig. S70** Comparative  $^{19}\text{F}$  NMR spectra for TBAF, **12** in  $\text{CDCl}_3$  at 298 K and after addition of TBAF (0.5 M) to **12** ( $1 \times 10^{-2}$  M) in  $\text{CDCl}_3$  at 223 K (\* at -80 to -40 ppm corresponds to unknown impurities in TBAF).

## 4.0 Crystallographic Data

Table S1

| Parameters                          | <b>10</b>                                                                    |
|-------------------------------------|------------------------------------------------------------------------------|
| Chemical formula                    | C <sub>49</sub> H <sub>33</sub> F <sub>4</sub> N <sub>3</sub> S <sub>2</sub> |
| Formula weight                      | 803.2052                                                                     |
| Temperature (K)                     | 100                                                                          |
| Crystal system                      | Triclinic                                                                    |
| Space group                         | P -1                                                                         |
| a (Å); α (°)                        | 15.72(3); 94.031(19)                                                         |
| b (Å); β (°)                        | 16.498(18); 100.44(4)                                                        |
| c (Å); γ (°)                        | 18.03(2); 90.63(4)                                                           |
| V (Å <sup>3</sup> ); Z              | 4586(11); 2                                                                  |
| ρ (calc.) g m <sup>-3</sup>         | 1.226                                                                        |
| μ(Mo Kα) mm <sup>-1</sup>           | 0.227                                                                        |
| 2θ <sub>max</sub> (°)               | 26.454                                                                       |
| R(int)                              | 0.0900                                                                       |
| Completeness to θ                   | 0.991                                                                        |
| Data / param.                       | 18771/5816                                                                   |
| GOF                                 | 0.919                                                                        |
| R1 [F > 4σ(F)]                      | 0.0900                                                                       |
| wR2 (all data)                      | 0.2839                                                                       |
| max. peak/hole (e.Å <sup>-3</sup> ) | 0.414/-0.349                                                                 |
| CCDC                                | <b>2252846</b>                                                               |

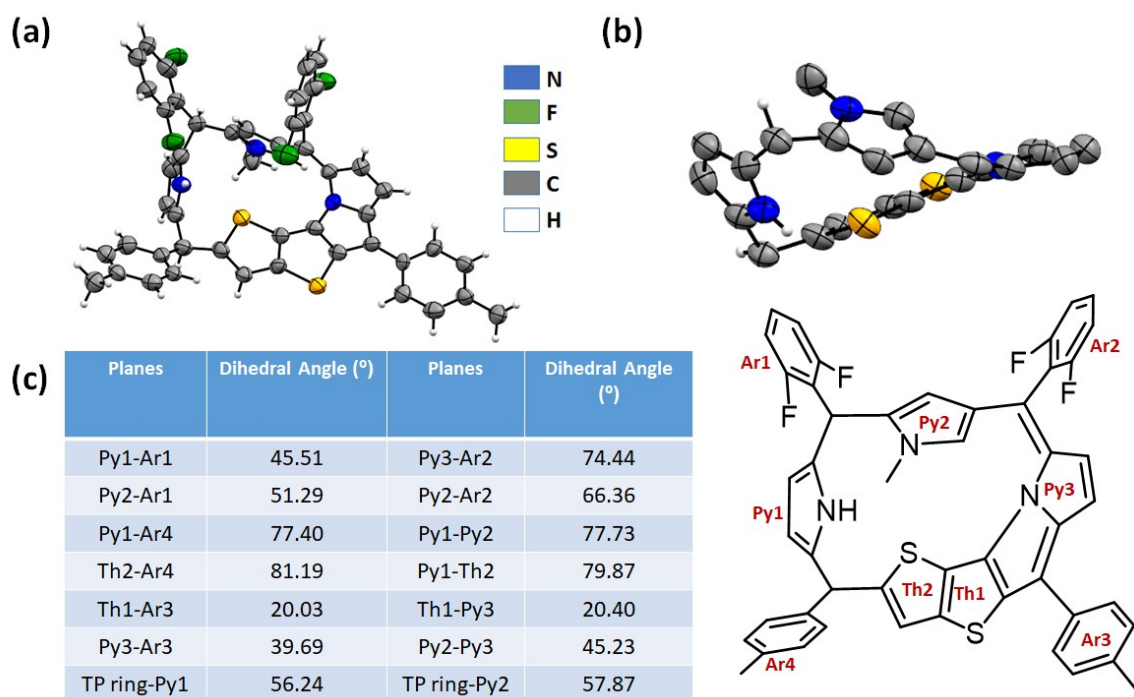

Fig. S71 Crystal structure of **10** (a: top view; b: side view, c: tabulated dihedral angles)

Tp ring: [5.5.5] tetracyclic ring

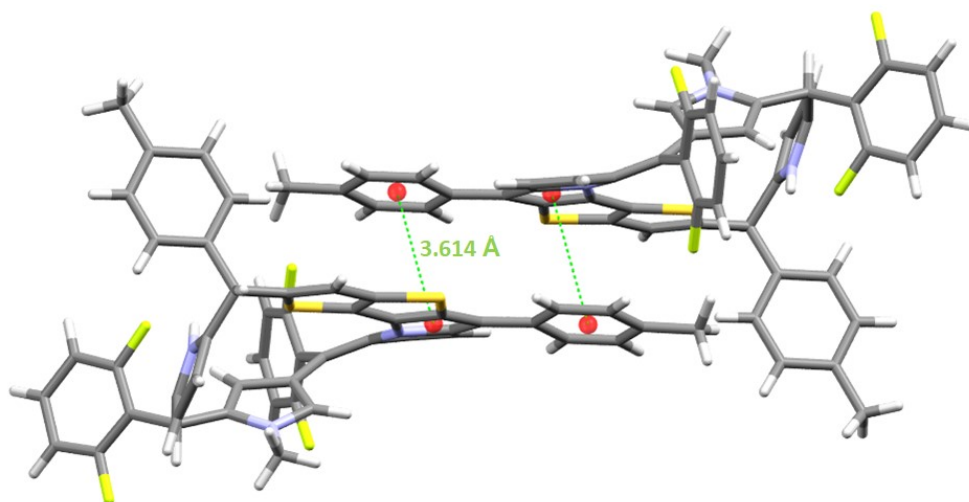

Fig. S72 Crystal structure of **10** showing strong  $\pi$ - $\pi$  stacking interaction.

## 5. Theoretical Calculation

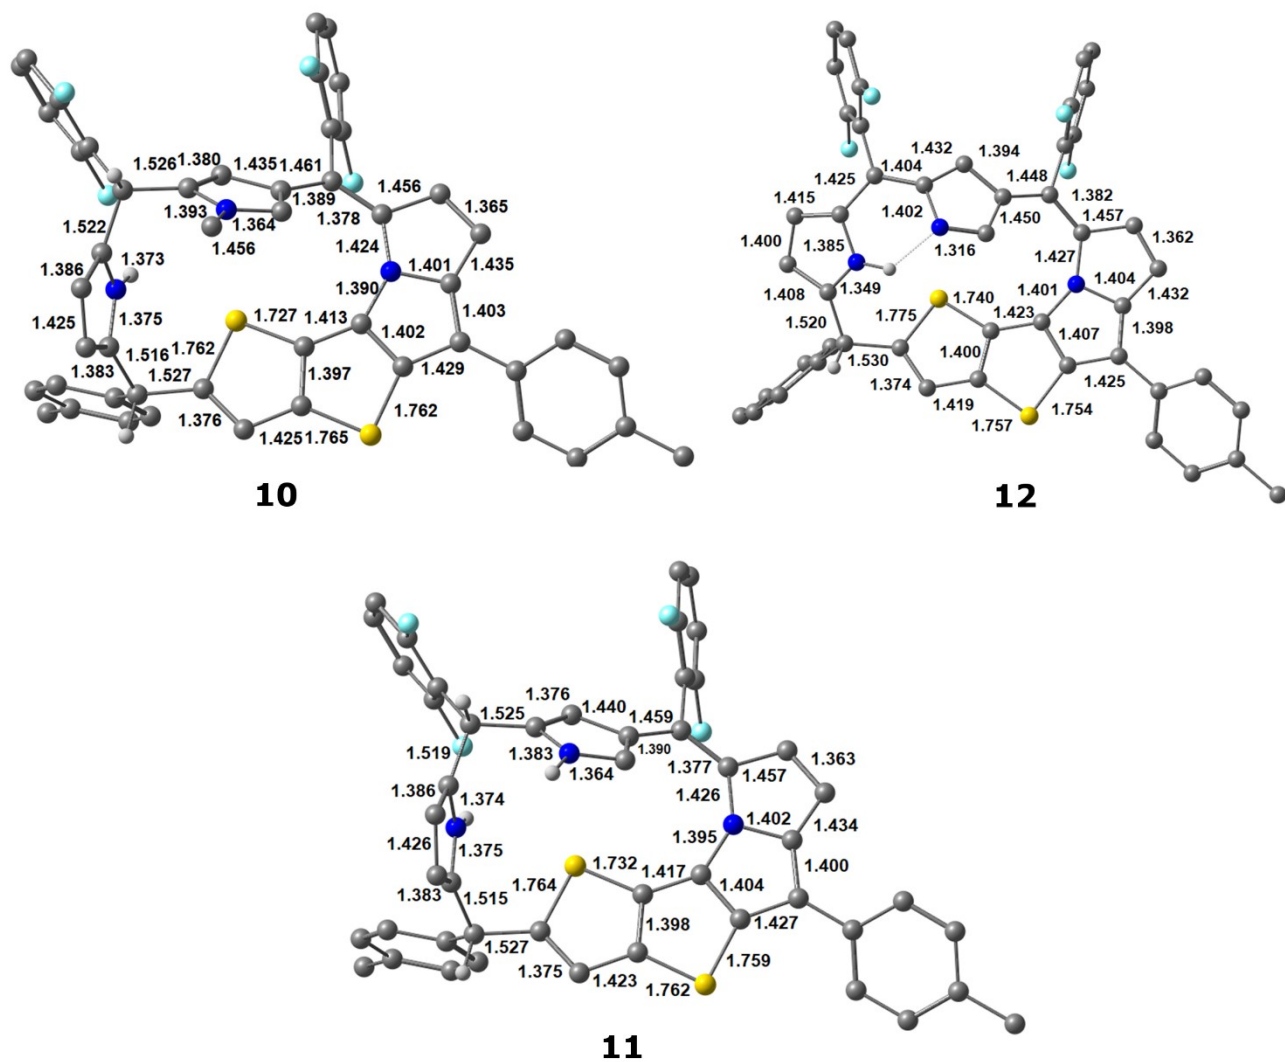

**Fig. S73** DFT optimised geometries and key bond length parameters (Å) of **10-12**, at B3LYP/6-31G\*\* level of theory.

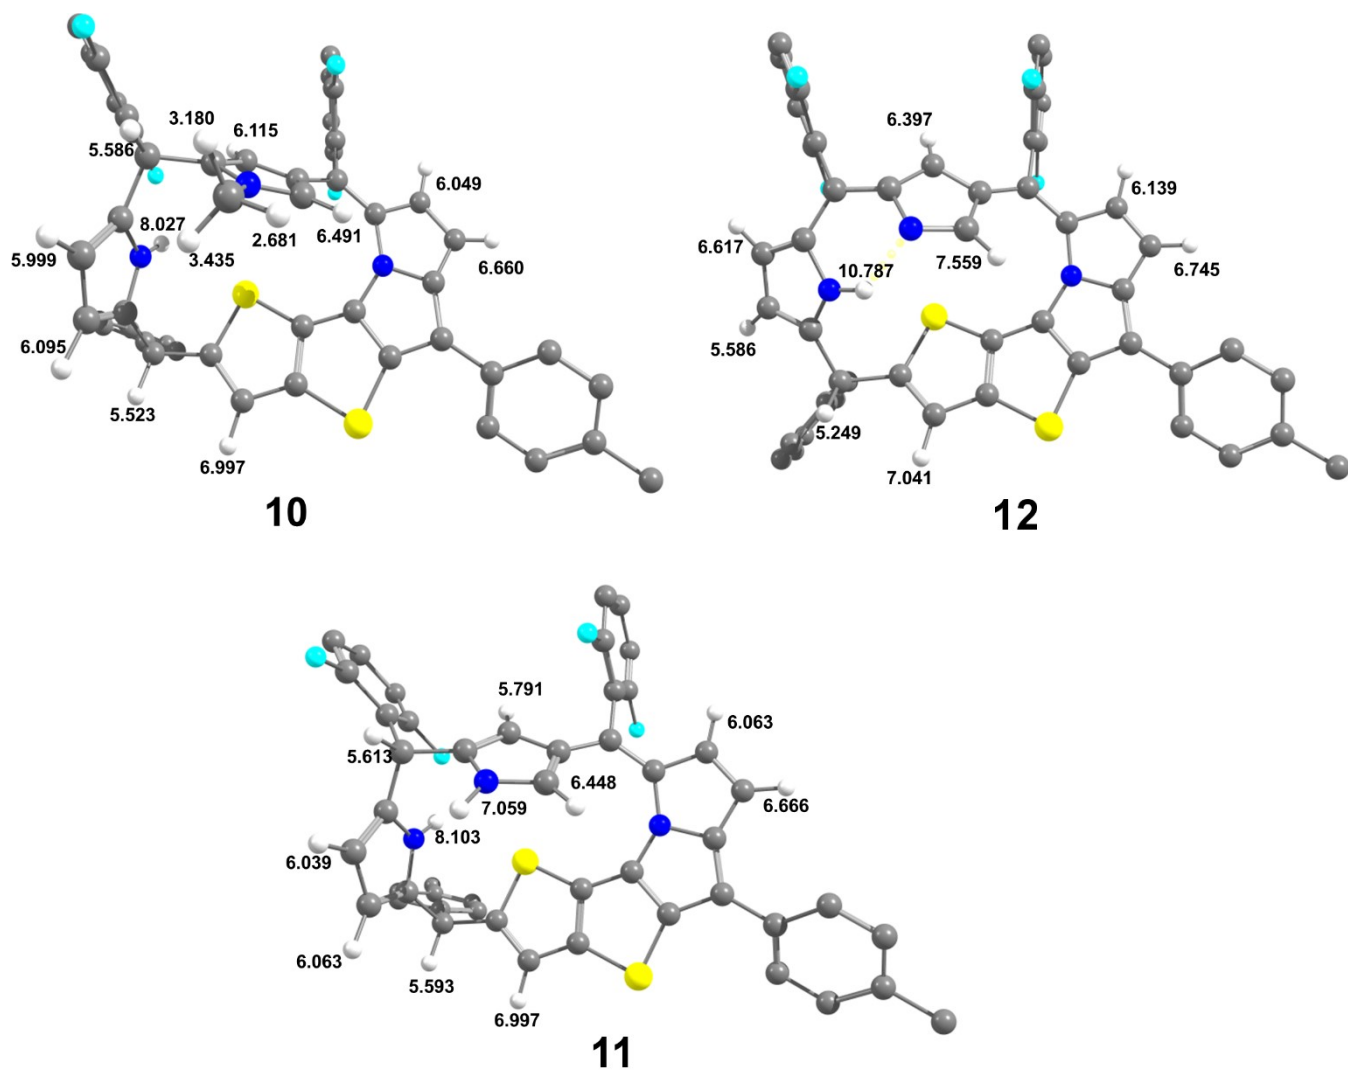

**Fig. S74**  $^1\text{H}$  NMR chemical shifts of DFT optimised geometries of **10-12**, at B3LYP/6-31G\*\* level of theory.

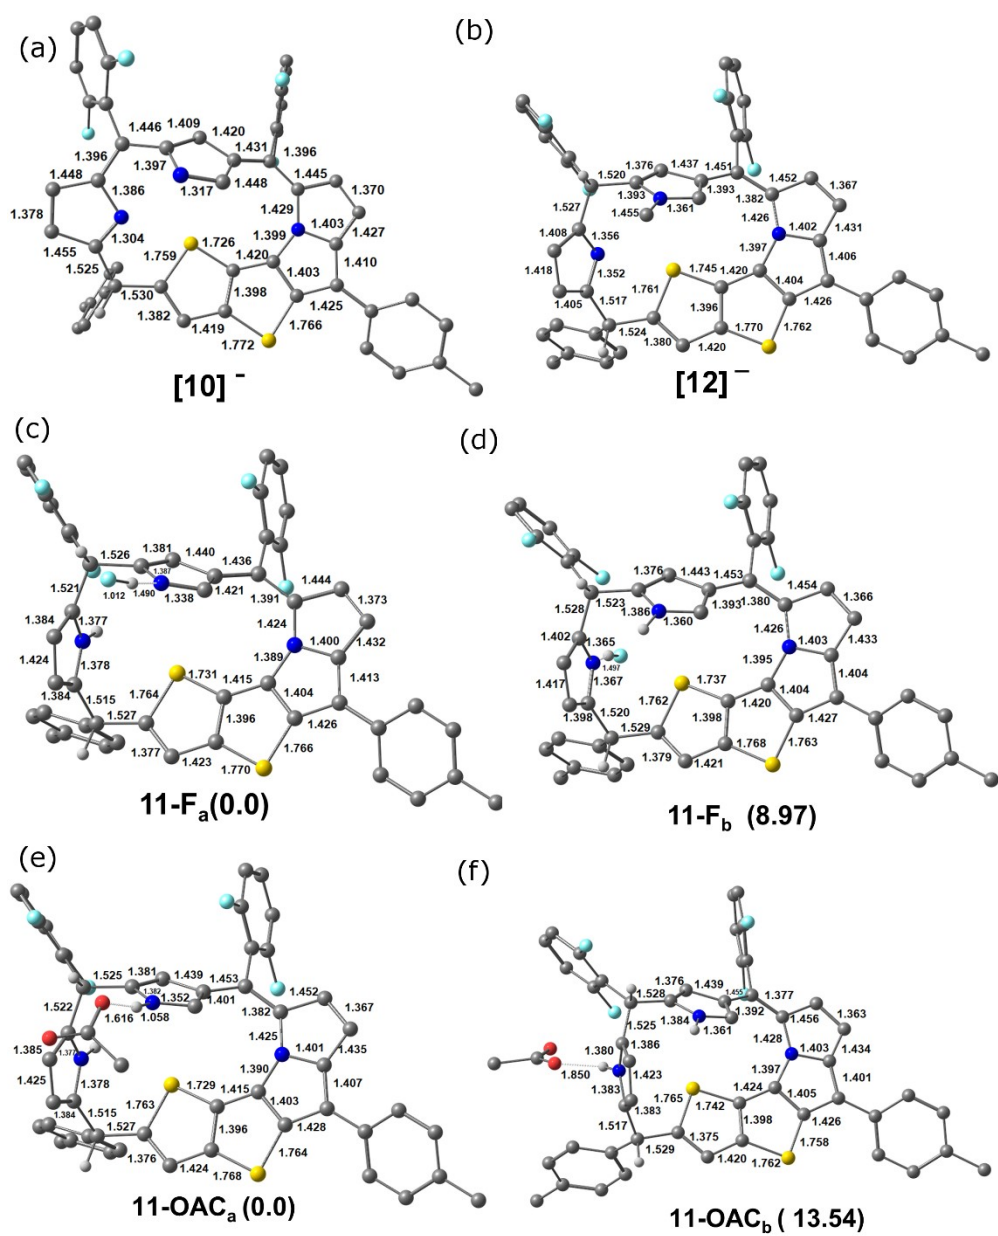

**Fig. S75** DFT optimised geometries and key bond length parameters (Å) of (a)  $[10]^-$ , (b)  $[12]^-$ , (c & d)  $[11-F]^-$ , (e & f)  $[11-AcO]^-$  at B3LYP/6-31G\*\* level of theory.



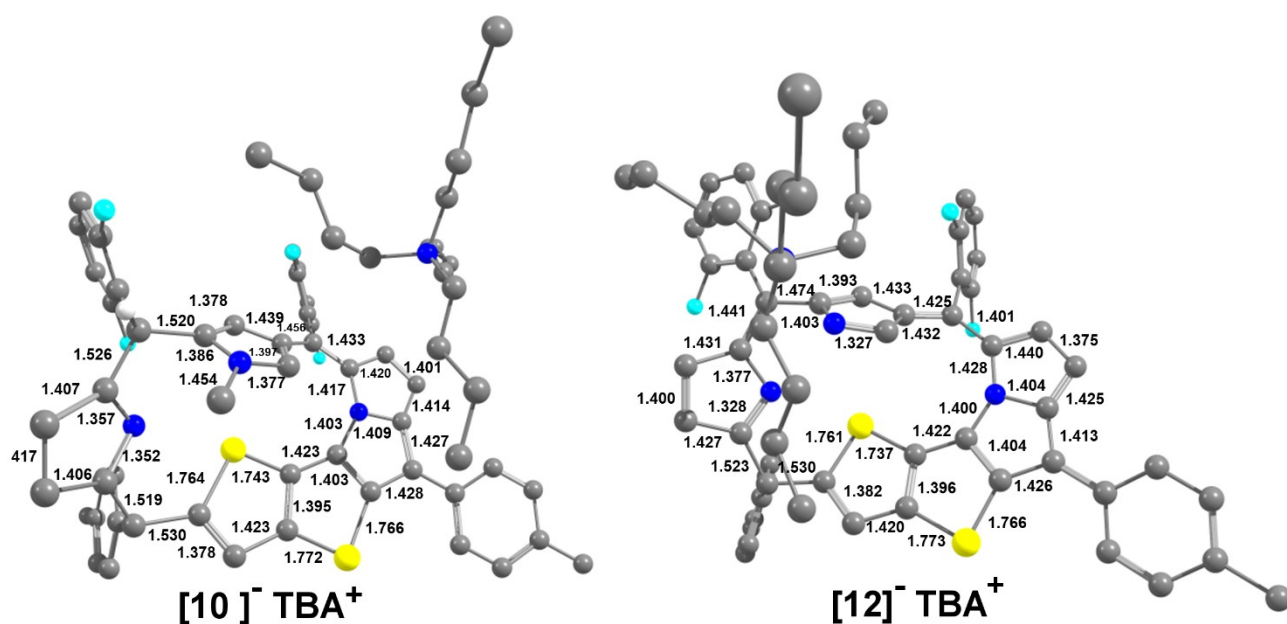

**Fig. S76** DFT optimised geometries and key bond length parameters (Å) of (a) [10]<sup>-</sup>TBA<sup>+</sup> (b) [12]<sup>-</sup>TBA<sup>+</sup> at B3LYP/6-31G<sup>\*\*</sup> level of theory.

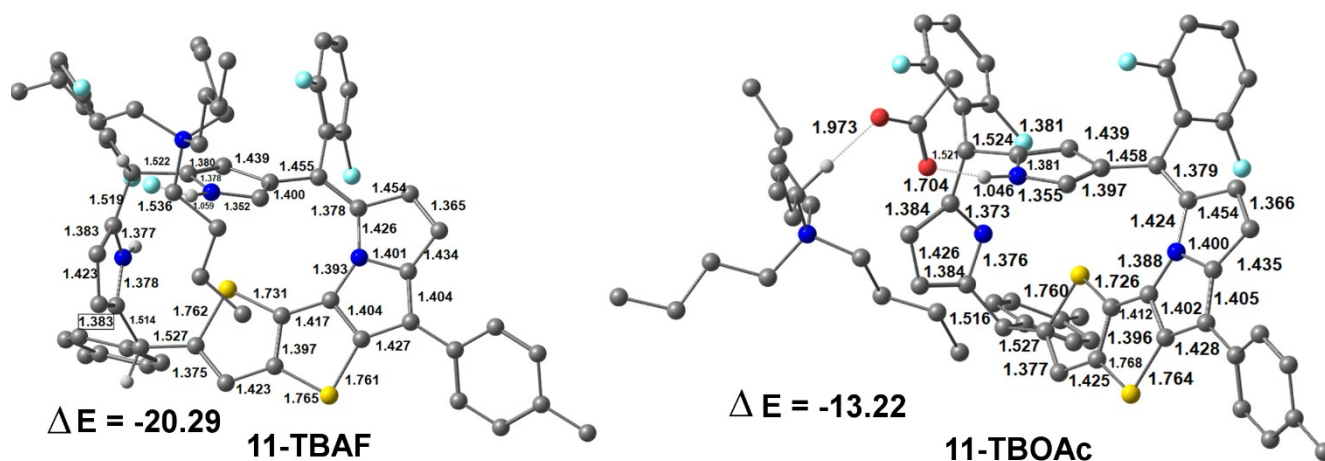

**Fig. S77** DFT optimised geometries and key bond length parameters (Å) of (a) 11-TBAF (b) 11-TBOAc at B3LYP/6-31G<sup>\*\*</sup> level of theory.

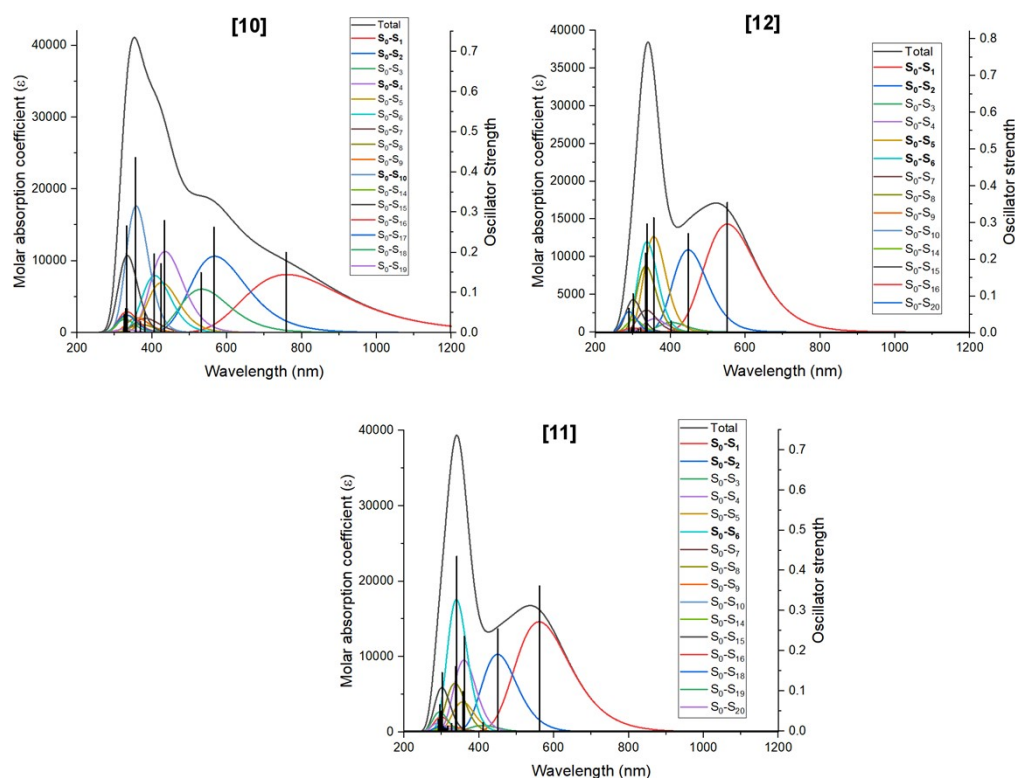

**Fig. S78** Steady state absorption spectrum (total) and individual transitions that are predicted from TD-DFT calculation with solvent (dichloromethane using a polarizable continuum model) and at B3LYP/ 6-31G\*\* level of theory for **10-12**.

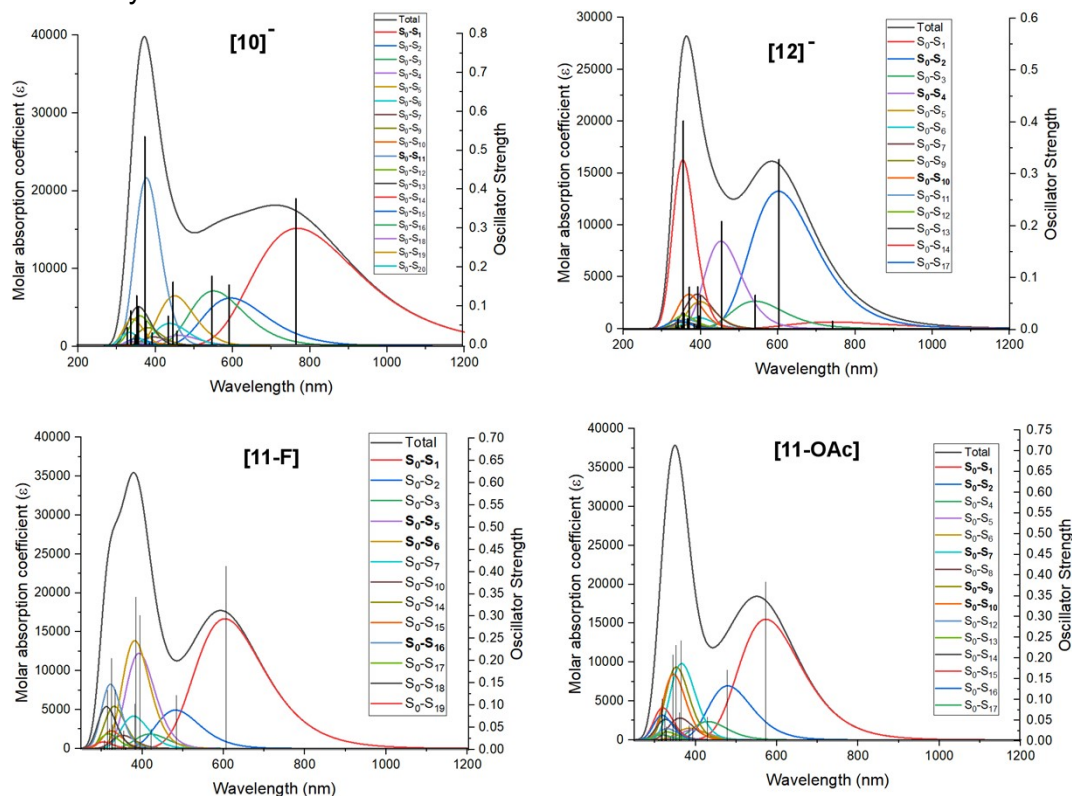

**Fig. S79** Steady state absorption spectrum (total) and individual transitions that are predicted from TD-DFT calculation with solvent (dichloromethane using a polarizable continuum model) and at B3LYP/ 6-31G\*\* level of theory for **[10]<sup>-</sup>**, **[11-F<sub>a</sub>]<sup>-</sup>**, **[11-OAc<sub>a</sub>]<sup>-</sup>** and **[12]<sup>-</sup>**.

**Table S2:** Summary of UV-vis spectral data of **10** that is predicted from TD-DFT calculation in presence of dichloromethane solvent and at B3LYP/ 6-31G (d, p) level of theory.

| No. | Energy (eV)   | Wavelength (nm) | Oscillator Strength | Symmetry         | Major contributions                                                             |
|-----|---------------|-----------------|---------------------|------------------|---------------------------------------------------------------------------------|
| 1   | <b>2.2106</b> | <b>560.86</b>   | <b>0.36130</b>      | <b>Singlet-A</b> | <b>H -&gt; L 97.7%</b>                                                          |
| 2   | <b>2.7553</b> | <b>449.98</b>   | <b>0.25470</b>      | <b>Singlet-A</b> | <b>H-1 -&gt; L 90.7%</b>                                                        |
| 3   | 3.0242        | 409.97          | 0.02130             | Singlet-A        | H-2 -> L 92.9%                                                                  |
| 4   | <b>3.4435</b> | <b>360.05</b>   | <b>0.23570</b>      | <b>Singlet-A</b> | <b>H -&gt; L+1 48.5%, H-3 -&gt; L 38.4%, H-4 -&gt; L 5.4%</b>                   |
| 5   | 3.4792        | 356.36          | 0.09850             | Singlet-A        | H-3 -> L 53.4%, H -> L+1 22.7%, H-4 -> L 14.9%                                  |
| 6   | <b>3.6480</b> | <b>339.87</b>   | <b>0.43420</b>      | <b>Singlet-A</b> | <b>H-4 -&gt; L 54.1%, H -&gt; L+1 22.2%, H -&gt; L+3 8.5%, H -&gt; L+2 8.1%</b> |
| 7   | 3.6645        | 338.34          | 0.01380             | Singlet-A        | H -> L+3 61.6%, H-4 -> L 17.6%, H -> L+2 9.9%, H-5 -> L 7.7%                    |
| 8   | 3.6907        | 335.94          | 0.15960             | Singlet-A        | H -> L+2 73.3%, H -> L+3 13.3%, H-5 -> L 5.2%                                   |
| 9   | 3.8047        | 325.87          | 0.01910             | Singlet-A        | H-5 -> L 71.2%, H -> L+3 13.0%, H -> L+9 5.8%                                   |
| 10  | 3.9246        | 315.92          | 0.01270             | Singlet-A        | H -> L+5 58.2%, H -> L+7 22.4%, H -> L+6 8.0%                                   |
| 11  | 3.9703        | 312.28          | 0.00660             | Singlet-A        | H -> L+6 75.7%, H -> L+5 6.9%, H-8 -> L 6.2%                                    |
| 12  | 4.0223        | 308.24          | 0.00800             | Singlet-A        | H-6 -> L 74.9%, H -> L+4 17.1%                                                  |
| 13  | 4.0284        | 307.78          | 0.00340             | Singlet-A        | H -> L+4 71.8%, H-6 -> L 17.0%                                                  |
| 14  | 4.0770        | 304.11          | 0.01140             | Singlet-A        | H -> L+7 50.6%, H -> L+5 24.1%, H -> L+8 9.2%                                   |
| 15  | 4.1182        | 301.06          | 0.14530             | Singlet-A        | H-1 -> L+1 62.3%, H-7 -> L 12.4%, H -> L+9 7.9%                                 |
| 16  | 4.1461        | 299.04          | 0.04970             | Singlet-A        | H-7 -> L 67.1%, H-1 -> L+1 14.7%, H-13 -> L 5.4%                                |
| 17  | 4.1501        | 298.75          | 0.00090             | Singlet-A        | H -> L+8 83.5%, H -> L+7 13.8%                                                  |
| 18  | 4.1596        | 298.07          | 0.01840             | Singlet-A        | H-8 -> L 83.7%, H -> L+6 6.5%                                                   |
| 19  | 4.2022        | 295.05          | 0.06550             | Singlet-A        | H -> L+9 56.8%, H-12 -> L 12.7%, H-1 -> L+1 7.3%                                |
| 20  | 4.2567        | 291.27          | 0.02990             | Singlet-A        | H-1 -> L+2 77.4%, H-2 -> L+2 11.1%                                              |

**Table S3:** Summary of UV-vis spectral data of **11** that is predicted from TD-DFT calculation in presence of dichloromethane solvent and at B3LYP/ 6-31G (d, p) level of theory.

| No. | Energy (eV)   | Wavelength (nm) | Oscillator Strength | Symmetry         | Major contributions                                                              |
|-----|---------------|-----------------|---------------------|------------------|----------------------------------------------------------------------------------|
| 1   | <b>2.2455</b> | <b>552.15</b>   | <b>0.35390</b>      | <b>Singlet-A</b> | <b>H -&gt; L 97.2%</b>                                                           |
| 2   | <b>2.7682</b> | <b>447.89</b>   | <b>0.26960</b>      | <b>Singlet-A</b> | <b>H-1 -&gt; L 91.2%</b>                                                         |
| 3   | 3.0816        | 402.34          | 0.03150             | Singlet-A        | H-2 -> L 93.8%                                                                   |
| 4   | 3.4763        | 356.66          | 0.04350             | Singlet-A        | H-3 -> L 91.5%                                                                   |
| 5   | <b>3.4848</b> | <b>355.79</b>   | <b>0.31330</b>      | <b>Singlet-A</b> | <b>H -&gt; L+1 64.4%, H-4 -&gt; L 16.9%, H -&gt; L+2 12.3%</b>                   |
| 6   | <b>3.6744</b> | <b>337.43</b>   | <b>0.29610</b>      | <b>Singlet-A</b> | <b>H-4 -&gt; L 43.7%, H -&gt; L+1 29.4%, H -&gt; L+2 16.7%, H -&gt; L+3 6.0%</b> |
| 7   | 3.6930        | 335.73          | 0.07190             | Singlet-A        | H -> L+3 33.5%, H -> L+2 31.6%, H-4 -> L 29.1%                                   |
| 8   | <b>3.7105</b> | 334.14          | 0.21630             | <b>Singlet-A</b> | <b>H -&gt; L+3 49.9%, H -&gt; L+2 37.1%</b>                                      |
| 9   | 3.8702        | 320.36          | 0.01320             | Singlet-A        | H-5 -> L 69.3%, H -> L+9 8.0%, H -> L+3 7.5%                                     |
| 10  | 3.9488        | 313.98          | 0.01010             | Singlet-A        | H -> L+5 51.8%, H -> L+7 35.2%                                                   |
| 11  | 4.0041        | 309.64          | 0.00510             | Singlet-A        | H -> L+6 76.6%, H-8 -> L 7.5%                                                    |
| 12  | 4.0512        | 306.04          | 0.00070             | Singlet-A        | H -> L+4 95.7%                                                                   |
| 13  | 4.0659        | 304.94          | 0.00240             | Singlet-A        | H-6 -> L 90.9%, H-5 -> L 5.2%                                                    |
| 14  | 4.0970        | 302.62          | 0.04100             | Singlet-A        | H -> L+7 36.5%, H -> L+5 26.3%, H-1 -> L+1 18.2%                                 |
| 15  | 4.1248        | 300.58          | 0.10640             | Singlet-A        | H-1 -> L+1 58.2%, H -> L+7 13.9%, H -> L+5 10.6%, H -> L+9 5.9%                  |
| 16  | 4.1650        | 297.68          | 0.01340             | Singlet-A        | H-8 -> L 83.0%, H -> L+6 7.7%                                                    |
| 17  | 4.1783        | 296.73          | 0.00060             | Singlet-A        | H -> L+8 75.1%, H-7 -> L 7.6%, H -> L+7 5.4%                                     |
| 18  | 4.1808        | 296.56          | 0.00800             | Singlet-A        | H-7 -> L 37.8%, H -> L+9 15.0%, H -> L+8 14.3%, H-12 -> L 12.3%,                 |
| 19  | 4.2306        | 293.07          | 0.00130             | Singlet-A        | H-1 -> L+2 72.6%, H-7 -> L 6.9%, H-2 -> L+2 6.7%                                 |
| 20  | 4.2778        | 289.83          | 0.06650             | Singlet-A        | H -> L+9 41.1%, H-7 -> L 29.3%, H-1 -> L+2 10.3%                                 |

**Table S4:** Summary of UV-vis spectral data of **12** that is predicted from TD-DFT calculation in presence of dichloromethane solvent and at B3LYP/ 6-31G (d, p) level of theory.

| No. | Energy (eV)   | Wavelength (nm) | Oscillator Strength | Symmetry         | Major contributions                                                                  |
|-----|---------------|-----------------|---------------------|------------------|--------------------------------------------------------------------------------------|
| 1   | <b>1.6299</b> | <b>760.69</b>   | <b>0.19980</b>      | <b>Singlet-A</b> | <b>H -&gt; L 97.9%</b>                                                               |
| 2   | <b>2.1838</b> | <b>567.75</b>   | <b>0.26260</b>      | <b>Singlet-A</b> | <b>H-1 -&gt; L 66.9%, H -&gt; L+1 30.7%</b>                                          |
| 3   | 2.3249        | 533.29          | 0.14940             | Singlet-A        | H -> L+1 58.5%, H-1 -> L 27.1%, H-2 -> L 12.6%                                       |
| 4   | <b>2.8489</b> | <b>435.20</b>   | <b>0.27900</b>      | <b>Singlet-A</b> | <b>H-1 -&gt; L+1 55.5%, H-2 -&gt; L 37.6%</b>                                        |
| 5   | 2.9109        | 425.93          | 0.17170             | Singlet-A        | H-3 -> L 33.5%, H-2 -> L 30.5%, H-1 -> L+1 25.4%                                     |
| 6   | 3.0391        | 407.96          | 0.19600             | Singlet-A        | H-3 -> L 61.8%, H-2 -> L 17.1%, H-1 -> L+1 11.1%                                     |
| 7   | 3.2383        | 382.87          | 0.04890             | Singlet-A        | H-4 -> L 90.0%                                                                       |
| 8   | 3.3404        | 371.17          | 0.02760             | Singlet-A        | H-2 -> L+1 91.2%                                                                     |
| 9   | 3.4460        | 359.79          | 0.05060             | Singlet-A        | H-5 -> L 82.0%, H -> L+2 8.9%                                                        |
| 10  | <b>3.4645</b> | <b>357.87</b>   | <b>0.43570</b>      | <b>Singlet-A</b> | <b>H -&gt; L+2 75.2%, H-5 -&gt; L 11.7%</b>                                          |
| 11  | 3.6234        | 342.18          | 0.00310             | Singlet-A        | H-9 -> L 97.2%                                                                       |
| 12  | 3.6564        | 339.09          | 0.00240             | Singlet-A        | H-6 -> L 93.5%                                                                       |
| 13  | 3.6661        | 338.19          | 0.00290             | Singlet-A        | H -> L+3 87.5%                                                                       |
| 14  | 3.6916        | 335.85          | 0.05910             | Singlet-A        | H-10 -> L 33.1%, H-11 -> L 18.6%, H-14 -> L 11.0%, H -> L+4 7.8%, H-8 -> L 7.6%,     |
| 15  | <b>3.7092</b> | <b>334.26</b>   | <b>0.26540</b>      | <b>Singlet-A</b> | <b>H-3 -&gt; L+1 48.4%, H -&gt; L+4 17.5%, H-4 -&gt; L+1 8.8%, H-10 -&gt; L 6.8%</b> |
| 16  | 3.7175        | 333.51          | 0.07150             | Singlet-A        | H-8 -> L 35.7%, H-12 -> L 30.9%, H -> L+4 11.2%, H-3 -> L+1 10.2%                    |
| 17  | 3.7359        | 331.87          | 0.06030             | Singlet-A        | H-3 -> L+1 24.1%, H -> L+4 21.9%, H-11 -> L 18.9%, H-8 -> L 14.4%, H-10 -> L 8.0%    |
| 18  | 3.7820        | 327.83          | 0.04560             | Singlet-A        | H-11 -> L 31.0%, H -> L+4 22.9%, H-8 -> L 20.1%, H-10 -> L 13.8%                     |
| 19  | 3.8060        | 325.76          | 0.01150             | Singlet-A        | H-12 -> L 40.4%, H-8 -> L 18.5%, H-11 -> L 12.9%, H -> L+4 10.7%, H-10 -> L 7.6%     |
| 20  | 3.8394        | 322.93          | 0.00060             | Singlet-A        | H-7 -> L 89.0%                                                                       |

**Table S5:** Summary of UV-vis spectral data of [10]<sup>-</sup> that is predicted from TD-DFT calculation in presence of dichloromethane solvent and at B3LYP/ 6-31G (d, p) level of theory.

| No. | Energy (eV)   | Wavelength (nm) | Oscillator Strength | Symmetry         | Major contributions                                            |
|-----|---------------|-----------------|---------------------|------------------|----------------------------------------------------------------|
| 1   | 1.6749        | 740.25          | 0.01600             | Singlet-A        | H -> L 99.7%                                                   |
| 2   | <b>2.0600</b> | <b>601.87</b>   | <b>0.32760</b>      | <b>Singlet-A</b> | <b>H-1 -&gt; L 98.5%</b>                                       |
| 3   | 2.2941        | 540.45          | 0.06570             | Singlet-A        | H-2 -> L 97.2%                                                 |
| 4   | <b>2.7367</b> | <b>453.04</b>   | <b>0.20840</b>      | <b>Singlet-A</b> | <b>H-3 -&gt; L 94.4%</b>                                       |
| 5   | 3.1105        | 398.60          | 0.06460             | Singlet-A        | H-5 -> L 63.1%, H-4 -> L 33.1%                                 |
| 6   | 3.1481        | 393.84          | 0.02630             | Singlet-A        | H-4 -> L 45.8%, H-5 -> L 24.1%, H -> L+2 15.0%, H -> L+3 10.6% |
| 7   | 3.1633        | 391.95          | 0.08210             | Singlet-A        | H -> L+3 42.1%, H -> L+2 28.6%, H-4 -> L 18.7%, H-5 -> L 7.9%  |
| 8   | 3.1952        | 388.03          | 0.00640             | Singlet-A        | H -> L+1 71.0%, H -> L+3 16.1%, H -> L+2 8.5%                  |
| 9   | 3.2453        | 382.04          | 0.01070             | Singlet-A        | H -> L+2 38.7%, H -> L+3 26.7%, H -> L+1 25.0%                 |
| 10  | 3.3531        | 369.76          | 0.08170             | Singlet-A        | H-6 -> L 74.6%, H-1 -> L+1 13.4%, H-1 -> L+2 6.9%              |
| 11  | 3.3988        | 364.79          | 0.02130             | Singlet-A        | H-1 -> L+1 82.5%, H-6 -> L 13.4%                               |
| 12  | 3.4795        | 356.33          | 0.03150             | Singlet-A        | H -> L+6 66.9%, H -> L+5 25.8%                                 |
| 13  | 3.4890        | 355.36          | 0.01620             | Singlet-A        | H -> L+5 55.2%, H -> L+6 31.5%, H-1 -> L+2 5.2%                |
| 14  | <b>3.5016</b> | <b>354.08</b>   | <b>0.40200</b>      | <b>Singlet-A</b> | <b>H-1 -&gt; L+2 77.9%, H -&gt; L+5 7.6%, H-6 -&gt; L 5.7%</b> |
| 15  | 3.5521        | 349.04          | 0.00700             | Singlet-A        | H -> L+4 80.3%, H-1 -> L+4 8.4%, H -> L+5 5.3%                 |
| 16  | 3.6082        | 343.62          | 0.00280             | Singlet-A        | H -> L+7 85.5%, H -> L+8 8.8%                                  |
| 17  | 3.6443        | 340.21          | 0.02010             | Singlet-A        | H-1 -> L+4 78.6%, H -> L+8 8.5%, H -> L+4 6.3%                 |
| 18  | 3.6562        | 339.11          | 0.00380             | Singlet-A        | H-1 -> L+5 63.5%, H-1 -> L+3 26.8%                             |
| 19  | 3.6632        | 338.46          | 0.00250             | Singlet-A        | H -> L+8 64.6%, H -> L+9 16.4%, H-1 -> L+4 6.0%                |
| 20  | 3.6949        | 335.55          | 0.00860             | Singlet-A        | H-1 -> L+3 55.3%, H-1 -> L+5 30.6%, H-2 -> L+3 9.4%            |



**Table S6:** Summary of UV-vis spectral data of [11-F<sub>a</sub>] that is predicted from TD-DFT calculation in presence of dichloromethane solvent and at B3LYP/ 6-31G (d, p) level of theory.

| No. | Energy (eV)   | Wavelength (nm) | Oscillator Strength | Symmetry         | Major contributions                                                              |
|-----|---------------|-----------------|---------------------|------------------|----------------------------------------------------------------------------------|
| 1   | <b>2.0549</b> | <b>603.36</b>   | <b>0.41210</b>      | <b>Singlet-A</b> | <b>H -&gt; L 99.0%</b>                                                           |
| 2   | <b>2.5708</b> | <b>482.28</b>   | <b>0.12190</b>      | <b>Singlet-A</b> | <b>H-1 -&gt; L 94.4%</b>                                                         |
| 3   | 2.9575        | 419.22          | 0.04610             | Singlet-A        | H-2 -> L 54.9%, H-3 -> L 36.0%                                                   |
| 4   | 3.0619        | 404.93          | 0.00690             | Singlet-A        | H-3 -> L 55.4%, H-2 -> L 39.7%                                                   |
| 5   | <b>3.1605</b> | <b>392.29</b>   | <b>0.30250</b>      | <b>Singlet-A</b> | <b>H -&gt; L+1 64.1%, H -&gt; L+3 14.3%, H -&gt; L+2 10.5%, H-3 -&gt; L 5.3%</b> |
| 6   | <b>3.2474</b> | <b>381.80</b>   | <b>0.34270</b>      | <b>Singlet-A</b> | <b>H -&gt; L+3 82.8%, H -&gt; L+1 12.8%</b>                                      |
| 7   | 3.2712        | 379.02          | 0.10260             | Singlet-A        | H -> L+2 83.2%, H -> L+1 14.1%                                                   |
| 8   | 3.4688        | 357.43          | 0.00570             | Singlet-A        | H -> L+7 91.2%, H-4 -> L 6.1%                                                    |
| 9   | 3.4902        | 355.24          | 0.00490             | Singlet-A        | H -> L+8 54.9%, H -> L+4 19.2%, H -> L+6 9.9%, H-4 -> L 8.9%                     |
| 10  | 3.5209        | 352.14          | 0.04180             | Singlet-A        | H-4 -> L 70.5%, H -> L+8 8.7%, H -> L+9 6.5%                                     |
| 11  | 3.5476        | 349.49          | 0.00040             | Singlet-A        | H -> L+4 73.6%, H -> L+8 25.2%                                                   |
| 12  | 3.5697        | 347.32          | 0.00240             | Singlet-A        | H -> L+5 95.8%                                                                   |
| 13  | 3.5767        | 346.64          | 0.00080             | Singlet-A        | H -> L+6 88.2%, H -> L+8 8.1%                                                    |
| 14  | 3.7438        | 331.17          | 0.13400             | Singlet-A        | H-1 -> L+1 67.0%, H -> L+9 16.4%, H-1 -> L+2 8.0%                                |
| 15  | 3.8190        | 324.65          | 0.05590             | Singlet-A        | H-1 -> L+2 42.5%, H-1 -> L+1 23.0%, H-5 -> L 20.1%, H -> L+9 8.8%                |
| 16  | 3.8471        | 322.28          | 0.20460             | Singlet-A        | H-5 -> L 66.0%, H-1 -> L+2 20.1%, H-1 -> L+3 8.9%                                |
| 17  | 3.9093        | 317.15          | 0.04640             | Singlet-A        | H-1 -> L+3 37.6%, H -> L+9 30.1%, H-1 -> L+2 21.8%                               |
| 18  | 3.9722        | 312.13          | 0.13300             | Singlet-A        | H-1 -> L+3 47.8%, H -> L+9 29.1%, H-5 -> L 6.6%, H-4 -> L 5.1%                   |
| 19  | 4.0723        | 304.46          | 0.02060             | Singlet-A        | H-6 -> L 92.4%                                                                   |
| 20  | 4.0838        | 303.60          | 0.00510             | Singlet-A        | H -> L+10 77.5%, H-1 -> L+4 10.6%                                                |

**Table S7:** Summary of UV-vis spectral data of [11-OAc<sub>a</sub>]<sup>-</sup> that is predicted from TD-DFT calculation in presence of dichloromethane solvent and at B3LYP/ 6-31G (d, p) level of theory.

| No. | Energy (eV)   | Wavelength (nm) | Oscillator Strength | Symmetry         | Major contributions                                                             |
|-----|---------------|-----------------|---------------------|------------------|---------------------------------------------------------------------------------|
| 1   | <b>2.1618</b> | <b>573.52</b>   | <b>0.38340</b>      | <b>Singlet-A</b> | <b>H -&gt; L 98.3%</b>                                                          |
| 2   | <b>2.5850</b> | <b>479.63</b>   | <b>0.17170</b>      | <b>Singlet-A</b> | <b>H-1 -&gt; L 95.6%</b>                                                        |
| 3   | 2.8277        | 438.46          | 0.00050             | Singlet-A        | H-2 -> L 98.9%                                                                  |
| 4   | 2.8770        | 430.95          | 0.05820             | Singlet-A        | H-3 -> L 92.0%                                                                  |
| 5   | 3.1394        | 394.93          | 0.03200             | Singlet-A        | H-4 -> L 76.1%, H-5 -> L 17.9%                                                  |
| 6   | 3.2120        | 386.00          | 0.03720             | Singlet-A        | H-5 -> L 70.4%, H-4 -> L 22.2%                                                  |
| 7   | <b>3.3878</b> | <b>365.97</b>   | <b>0.24240</b>      | <b>Singlet-A</b> | <b>H -&gt; L+1 70.2%, H-7 -&gt; L 14.1%, H-6 -&gt; L 7.1%</b>                   |
| 8   | 3.4259        | 361.90          | 0.06940             | Singlet-A        | H-6 -> L 84.1%, H -> L+1 8.7%, H-5 -> L 5.7%                                    |
| 9   | <b>3.5118</b> | <b>353.05</b>   | <b>0.23170</b>      | <b>Singlet-A</b> | <b>H -&gt; L+2 48.7%, H -&gt; L+3 41.7%</b>                                     |
| 10  | <b>3.5818</b> | <b>346.15</b>   | <b>0.20840</b>      | <b>Singlet-A</b> | <b>H-7 -&gt; L 76.6%, H -&gt; L+1 11.2%</b>                                     |
| 11  | 3.6439        | 340.25          | 0.00940             | Singlet-A        | H -> L+3 52.2%, H -> L+2 42.8%                                                  |
| 12  | 3.7527        | 330.39          | 0.03550             | Singlet-A        | H -> L+4 77.2%, H -> L+6 10.0%                                                  |
| 13  | 3.7714        | 328.75          | 0.02530             | Singlet-A        | H -> L+5 57.9%, H-8 -> L 27.5%, H-9 -> L 5.7%                                   |
| 14  | 3.7994        | 326.33          | 0.06510             | Singlet-A        | H-8 -> L 40.0%, H -> L+5 38.1%, H-9 -> L 6.9%, H -> L+9 5.3%                    |
| 15  | 3.8783        | 319.69          | 0.10200             | Singlet-A        | H-9 -> L 74.5%, H-8 -> L 11.5%, H-1 -> L+1 9.0%                                 |
| 16  | 3.8963        | 318.21          | 0.07800             | Singlet-A        | H-1 -> L+1 66.8%, H -> L+6 10.5%, H-9 -> L 5.7%                                 |
| 17  | 3.9163        | 316.59          | 0.01550             | Singlet-A        | H -> L+6 39.0%, H -> L+8 19.0%, H-1 -> L+1 15.5%, H -> L+4 12.6%, H -> L+7 8.7% |
| 18  | 3.9465        | 314.16          | 0.00060             | Singlet-A        | H -> L+8 69.2%, H -> L+6 29.5%                                                  |
| 19  | 3.9707        | 312.25          | 0.00260             | Singlet-A        | H -> L+7 88.7%, H -> L+6 5.7%                                                   |
| 20  | 4.0056        | 309.53          | 0.00400             | Singlet-A        | H-1 -> L+2 50.0%, H-1 -> L+3 40.9%                                              |

**Table S8:** Total complexation energy ( $\Delta E_{\text{com}}(\text{corr})$ , kcal/mol), basis set superposition error (BSSE), total energy of complex and fragments (in a.u) and complex energy (raw, kcal/mol) for anion binding of **11**

| B1/B3LYP/6-31G**                    | E <sub>corr</sub> | BSSE        | E <sub>frag</sub> | E <sub>com(raw)</sub> | E <sub>com_corr</sub> |
|-------------------------------------|-------------------|-------------|-------------------|-----------------------|-----------------------|
| [11-F <sub>a</sub> ] <sup>-</sup>   | -3307.620716      | 0.050144587 | -3307.420166      | -157.31               | -125.85               |
| [11-OAc <sub>a</sub> ] <sup>-</sup> | -3436.306027      | 0.0133508   | -3436.255947      | -39.8                 | -31.43                |
| [11-TBAF]                           | -3993.750091      | 0.028606406 | -3993.717755      | -38.24                | -20.29                |
| [11-TBOAc]                          | -4122.426704      | 0.012694878 | -4122.405635      | -21.19                | -13.22                |

**Table S9:** Summary of UV-vis spectral data of [12] that is predicted from TD-DFT calculation in presence of dichloromethane solvent and at B3LYP/ 6-31G (d, p) level of theory.

| No. | Energy (eV)   | Wavelength (nm) | Oscillator Strength | Symmetry         | Major contributions                                                              |
|-----|---------------|-----------------|---------------------|------------------|----------------------------------------------------------------------------------|
| 1   | <b>1.9073</b> | <b>650.05</b>   | <b>0.46460</b>      | <b>Singlet-A</b> | <b>H -&gt; L 96.3%</b>                                                           |
| 2   | 2.1826        | 568.06          | 0.04870             | Singlet-A        | H-1 -> L 65.9%, H -> L+1 31.9%                                                   |
| 3   | <b>2.4532</b> | <b>505.40</b>   | <b>0.36120</b>      | <b>Singlet-A</b> | <b>H -&gt; L+1 63.8%, H-1 -&gt; L 27.9%</b>                                      |
| 4   | 2.6453        | 468.70          | 0.03290             | Singlet-A        | H-1 -> L+1 88.3%, H-2 -> L 6.7%                                                  |
| 5   | 2.9007        | 427.43          | 0.20970             | Singlet-A        | H-2 -> L 80.6%                                                                   |
| 6   | 3.1093        | 398.75          | 0.05460             | Singlet-A        | H-3 -> L 82.2%                                                                   |
| 7   | 3.2385        | 382.84          | 0.03980             | Singlet-A        | H -> L+2 90.6%                                                                   |
| 8   | 3.3233        | 373.08          | 0.16000             | Singlet-A        | H -> L+3 85.8%                                                                   |
| 9   | 3.3807        | 366.74          | 0.09220             | Singlet-A        | H-4 -> L 55.5%, H-2 -> L+1 20.8%, H -> L+4 5.4%,                                 |
| 10  | 3.4113        | 363.45          | 0.06640             | Singlet-A        | H -> L+4 60.0%, H-2 -> L+1 27.7%                                                 |
| 11  | 3.4253        | 361.97          | 0.04040             | Singlet-A        | H-2 -> L+1 39.8%, H -> L+4 22.8%, H-4 -> L 20.8%, H-3 -> L 5.2%, H-3 -> L+1 5.0% |
| 12  | 3.5353        | 350.70          | 0.01580             | Singlet-A        | H -> L+5 95.0%                                                                   |
| 13  | 3.5481        | 349.44          | 0.00940             | Singlet-A        | H -> L+6 86.6%                                                                   |
| 14  | 3.5780        | 346.52          | 0.18330             | Singlet-A        | H-3 -> L+1 44.2%, H-1 -> L+2 34.7%                                               |
| 15  | 3.6322        | 341.35          | 0.15760             | Singlet-A        | H-1 -> L+2 31.3%, H-3 -> L+1 21.5%, H-5 -> L 16.7%, H-1 -> L+3 11.2%             |
| 16  | 3.6677        | 338.04          | 0.04020             | Singlet-A        | H-1 -> L+3 63.2%, H-1 -> L+2 12.1%, H-3 -> L+1 6.7%, H-5 -> L 6.0%               |
| 17  | 3.7329        | 332.14          | 0.11690             | Singlet-A        | H-5 -> L 43.4%, H-1 -> L+3 10.0%, H-6 -> L 8.9%, H-3 -> L+1 7.1%, H -> L+7 6.4%  |
| 18  | 3.7517        | 330.47          | 0.01390             | Singlet-A        | H -> L+7 83.1%, H-1 -> L+7 5.2%, H-5 -> L 5.1%                                   |
| 19  | 3.7580        | 329.92          | 0.05030             | Singlet-A        | H-6 -> L 47.1%, H-7 -> L 13.6%, H-5 -> L 9.4%, H-1 -> L+3 9.3%                   |
| 20  | 3.7960        | 326.62          | 0.01500             | Singlet-A        | H-1 -> L+4 76.5%, H-4 -> L+1 6.2%, H -> L+4 5.1%                                 |

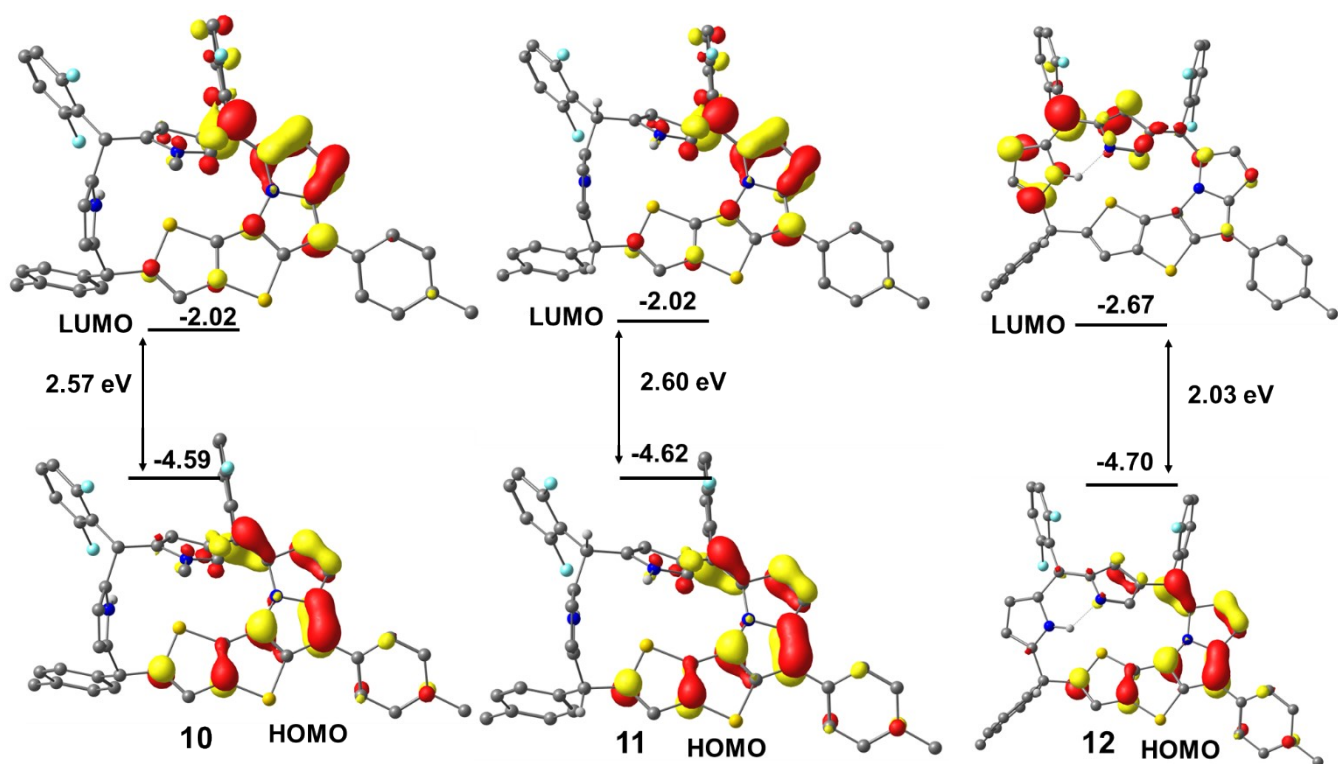

**Fig. S80** HOMO-LUMO orbitals for DFT optimized structures of **10** (a), **11** (b), **12** (c) at B3LYP/6-31G\*\* level of theory.

**Table S10:** Total energies, zero-point energies and free energy for macrocycles **10,11,12**, anion bound and deprotonated forms of **10-12**.

| B1                                         | E            | E+ZPE        | G            | $\Delta E$ | $\Delta E+ZPE$ | $\Delta G$ |
|--------------------------------------------|--------------|--------------|--------------|------------|----------------|------------|
| <b>10</b>                                  | -3247.070329 | -3246.378544 | -3246.463106 |            |                |            |
| <b>11</b>                                  | -3207.761193 | -3207.097103 | -3207.181404 |            |                |            |
| <b>12</b>                                  | -3205.82910  | -3205.87527  | -3205.96000  |            |                |            |
| gas phase                                  |              |              |              |            |                |            |
| [ <b>10</b> ] <sup>-</sup>                 | -3246.502322 | -3245.826012 | -3245.910866 |            |                |            |
| [ <b>11-F<sub>a</sub></b> ] <sup>-</sup>   | -3307.671551 | -3307.009426 | -3307.094097 | 0.00       | 0.00           | 0.00       |
| [ <b>11-F<sub>b</sub></b> ] <sup>-</sup>   | -3307.654529 | -3306.992622 | -3307.07889  | 10.68      | 10.54          | 9.54       |
| [ <b>11-OAc<sub>a</sub></b> ] <sup>-</sup> | -3436.321352 | -3435.608912 | -3435.702436 | 0.00       | 0.00           | 0.00       |
| [ <b>11-OAc<sub>b</sub></b> ] <sup>-</sup> | -3436.300086 | -3435.587352 | -3435.679639 | 13.34      | 13.53          | 14.31      |
| [ <b>12</b> ] <sup>-</sup>                 | -3205.28853  | -3205.33485  | -3205.42028  |            |                |            |
| Solvent                                    |              |              |              |            |                |            |
| [ <b>11-F<sub>a</sub></b> ] <sup>-</sup>   | -3307.72619  | -3307.064318 | -3307.150118 | 0.00       | 0.00           | 0.00       |
| [ <b>11-F<sub>b</sub></b> ] <sup>-</sup>   | -3307.711883 | -3307.049555 | -3307.134134 | 8.98       | 9.26           | 10.03      |
| [ <b>11-OAc<sub>a</sub></b> ] <sup>-</sup> | -3436.382922 | -3435.66994  | -3435.763045 | 0.00       | 0.00           | 0.00       |
| [ <b>11-OAc<sub>b</sub></b> ] <sup>-</sup> | -3436.361337 | -3435.6476   | -3435.737134 | 13.54      | 14.02          | 16.26      |
| [ <b>11-TBAF</b> ]                         | -3993.778698 | -3992.606406 | -3992.725182 |            |                |            |
| [ <b>11-TBOAC</b> ]                        | -4122.439399 | -4121.217368 | -4121.344117 |            |                |            |

## 6. Cartesian Coordinates

All structures have zero imaginary frequencies, total energies are given in table S10

|    |              |              |              |           |              |              |              |
|----|--------------|--------------|--------------|-----------|--------------|--------------|--------------|
| 16 | 3.673158000  | 2.687326000  | -0.931021000 | 1         | -1.401656000 | 0.215041000  | -3.970600000 |
| 16 | -0.220036000 | 1.353346000  | -0.059230000 | 1         | -1.747423000 | -1.481444000 | -4.391153000 |
| 9  | -0.542690000 | -4.757126000 | -0.365510000 | 6         | -3.489821000 | -0.748285000 | -1.990220000 |
| 9  | 0.895093000  | -2.262672000 | 3.383230000  | 1         | -3.663807000 | -1.080122000 | -3.017030000 |
| 9  | -4.077108000 | -0.272673000 | 0.846984000  | 6         | -4.651470000 | -1.337796000 | -1.193214000 |
| 9  | -5.377748000 | -2.494861000 | -3.120839000 | 6         | -4.923657000 | -1.079162000 | 0.151953000  |
| 7  | 2.747848000  | -0.915151000 | 0.105664000  | 6         | -6.005271000 | -1.606972000 | 0.844082000  |
| 7  | -1.036365000 | -1.177788000 | -2.429533000 | 1         | -6.138186000 | -1.352706000 | 1.889134000  |
| 7  | -2.975130000 | 1.538981000  | -1.043663000 | 6         | -6.885324000 | -2.448955000 | 0.165763000  |
| 1  | -2.863104000 | 1.190812000  | -0.104495000 | 1         | -7.738226000 | -2.871976000 | 0.685957000  |
| 6  | 6.276439000  | 0.212299000  | -0.274764000 | 6         | -6.670494000 | -2.749498000 | -1.177827000 |
| 6  | 6.872854000  | 1.472829000  | -0.089634000 | 1         | -7.332481000 | -3.400503000 | -1.736775000 |
| 1  | 6.250684000  | 2.331668000  | 0.142896000  | 6         | -5.569295000 | -2.192203000 | -1.815763000 |
| 6  | 8.254111000  | 1.631141000  | -0.160322000 | 6         | -1.743688000 | 3.682758000  | -0.630264000 |
| 1  | 8.683538000  | 2.617964000  | -0.004560000 | 1         | -1.606679000 | 4.615866000  | -1.192823000 |
| 6  | 9.101315000  | 0.545495000  | -0.416419000 | 6         | -2.638410000 | 2.799971000  | -1.477336000 |
| 6  | 8.508435000  | -0.711241000 | -0.599916000 | 6         | -3.448353000 | 0.770933000  | -2.079303000 |
| 1  | 9.138411000  | -1.573361000 | -0.806502000 | 6         | -3.501187000 | 1.594755000  | -3.192381000 |
| 6  | 7.128467000  | -0.876550000 | -0.538892000 | 1         | -3.834488000 | 1.298813000  | -4.178225000 |
| 1  | 6.698391000  | -1.856123000 | -0.723312000 | 6         | -2.988968000 | 2.869912000  | -2.813389000 |
| 6  | 4.825552000  | 0.038765000  | -0.196078000 | 1         | -2.843630000 | 3.726254000  | -3.457572000 |
| 6  | 3.797087000  | 0.999925000  | -0.439342000 | 6         | -2.355278000 | 4.050669000  | 0.733411000  |
| 6  | 2.540088000  | 0.423979000  | -0.205748000 | 6         | -1.558195000 | 4.265798000  | 1.862896000  |
| 6  | 4.131623000  | -1.118500000 | 0.188175000  | 1         | -0.484077000 | 4.125770000  | 1.794677000  |
| 6  | 10.596284000 | 0.727253000  | -0.523927000 | 6         | -2.126425000 | 4.661122000  | 3.073758000  |
| 1  | 11.133948000 | -0.164895000 | -0.188074000 | 1         | -1.482730000 | 4.820422000  | 3.935568000  |
| 1  | 10.940302000 | 1.575107000  | 0.076008000  | 6         | -3.506787000 | 4.855014000  | 3.200542000  |
| 1  | 10.901994000 | 0.918216000  | -1.560660000 | 6         | -4.300076000 | 4.646122000  | 2.065184000  |
| 6  | 1.485558000  | 1.356229000  | -0.330158000 | 1         | -5.375451000 | 4.795177000  | 2.129241000  |
| 6  | 1.921016000  | 2.622675000  | -0.726721000 | 6         | -3.736929000 | 4.249551000  | 0.853741000  |
| 6  | 2.056180000  | -2.034899000 | 0.650020000  | 1         | -4.375453000 | 4.093720000  | -0.011122000 |
| 6  | 3.111302000  | -2.893786000 | 1.168692000  | 6         | -4.122977000 | 5.248650000  | 4.522105000  |
| 1  | 2.918376000  | -3.857867000 | 1.616028000  | 1         | -4.400989000 | 4.365087000  | 5.110526000  |
| 6  | 4.332734000  | -2.376274000 | 0.848924000  | 1         | -5.031601000 | 5.841595000  | 4.379714000  |
| 1  | 5.295538000  | -2.820469000 | 1.057800000  | 1         | -3.427189000 | 5.835568000  | 5.129177000  |
| 6  | 0.723925000  | -2.370382000 | 0.540918000  |           |              |              |              |
| 6  | -0.210035000 | -1.847945000 | -0.453363000 | <b>11</b> |              |              |              |
| 6  | 0.106006000  | -1.515378000 | -1.764730000 | 16        | -3.582589000 | -2.809046000 | -0.796203000 |
| 1  | 1.056439000  | -1.545218000 | -2.276046000 | 16        | 0.299312000  | -1.324824000 | -0.126534000 |
| 6  | -2.121786000 | -1.271055000 | -1.561591000 | 9         | 0.269950000  | 4.827826000  | -0.876460000 |
| 6  | -1.633951000 | -1.705261000 | -0.345714000 | 9         | -0.934976000 | 2.656724000  | 3.143298000  |
| 1  | -2.215415000 | -1.858621000 | 0.550174000  | 9         | 3.866460000  | 0.333800000  | 0.892490000  |
| 6  | 0.867821000  | 3.573005000  | -0.863160000 | 9         | 5.604795000  | 2.471407000  | -2.954028000 |
| 1  | 1.002237000  | 4.595627000  | -1.197870000 | 7         | -2.761368000 | 0.874117000  | 0.029010000  |
| 6  | -0.360214000 | 3.042043000  | -0.542543000 | 7         | 1.097742000  | 1.014490000  | -2.441299000 |
| 6  | 0.209434000  | -3.434275000 | 1.444107000  | 7         | 3.089464000  | -1.499343000 | -1.130599000 |
| 6  | -0.441225000 | -4.584160000 | 0.965591000  | 1         | 3.061189000  | -1.209654000 | -0.164755000 |
| 6  | -0.966315000 | -5.569275000 | 1.791752000  | 6         | -6.250737000 | -0.409125000 | -0.215338000 |
| 1  | -1.445036000 | -6.432479000 | 1.343949000  | 6         | -6.795337000 | -1.673509000 | 0.072885000  |
| 6  | -0.847821000 | -5.420834000 | 3.173729000  | 1         | -6.137188000 | -2.489515000 | 0.355290000  |
| 1  | -1.250494000 | -6.181338000 | 3.834858000  | 6         | -8.169977000 | -1.889913000 | 0.030665000  |
| 6  | -0.211807000 | -4.302121000 | 3.709535000  | 1         | -8.558425000 | -2.879387000 | 0.259780000  |
| 1  | -0.108704000 | -4.154559000 | 4.778349000  | 6         | -9.061520000 | -0.859317000 | -0.293081000 |
| 6  | 0.298617000  | -3.342204000 | 2.843291000  | 6         | -8.519569000 | 0.399461000  | -0.586935000 |
| 6  | -1.073429000 | -0.818297000 | -3.839646000 | 1         | -9.184023000 | 1.215632000  | -0.860996000 |
| 1  | -0.069373000 | -0.931598000 | -4.250108000 | 6         | -7.146630000 | 0.621969000  | -0.554912000 |

|   |               |              |              |
|---|---------------|--------------|--------------|
| 1 | -6.756123000  | 1.596945000  | -0.829438000 |
| 6 | -4.806102000  | -0.176005000 | -0.173803000 |
| 6 | -3.745631000  | -1.108312000 | -0.379310000 |
| 6 | -2.504021000  | -0.475555000 | -0.209397000 |
| 6 | -4.152302000  | 1.026527000  | 0.121883000  |
| 6 | -10.553628000 | -1.089520000 | -0.305104000 |
| 1 | -11.000147000 | -0.863416000 | 0.671751000  |
| 1 | -10.796644000 | -2.130429000 | -0.538742000 |
| 1 | -11.051450000 | -0.452380000 | -1.042613000 |
| 6 | -1.420238000  | -1.380618000 | -0.327133000 |
| 6 | -1.831271000  | -2.675069000 | -0.658626000 |
| 6 | -2.117004000  | 2.072334000  | 0.455786000  |
| 6 | -3.204402000  | 2.925050000  | 0.917965000  |
| 1 | -3.049430000  | 3.931753000  | 1.276708000  |
| 6 | -4.403731000  | 2.325233000  | 0.675267000  |
| 1 | -5.383703000  | 2.738709000  | 0.866200000  |
| 6 | -0.808808000  | 2.472815000  | 0.300198000  |
| 6 | 0.169865000   | 1.896743000  | -0.616412000 |
| 6 | -0.093402000  | 1.339204000  | -1.862234000 |
| 1 | -1.030910000  | 1.186894000  | -2.374207000 |
| 6 | 2.147593000   | 1.312823000  | -1.591884000 |
| 6 | 1.602694000   | 1.890635000  | -0.468140000 |
| 1 | 2.147231000   | 2.246747000  | 0.392773000  |
| 6 | -0.759715000  | -3.599014000 | -0.812577000 |
| 1 | -0.879575000  | -4.633978000 | -1.113148000 |
| 6 | 0.464898000   | -3.024660000 | -0.566957000 |
| 6 | -0.362457000  | 3.661017000  | 1.078505000  |
| 6 | 0.196276000   | 4.795522000  | 0.467106000  |
| 6 | 0.658485000   | 5.898920000  | 1.172657000  |
| 1 | 1.067370000   | 6.740859000  | 0.626060000  |
| 6 | 0.569051000   | 5.891320000  | 2.564752000  |
| 1 | 0.923352000   | 6.745230000  | 3.133007000  |
| 6 | 0.024255000   | 4.793770000  | 3.229457000  |
| 1 | -0.053794000  | 4.754941000  | 4.309820000  |
| 6 | -0.425495000  | 3.712281000  | 2.480564000  |
| 6 | 3.540937000   | 0.832701000  | -1.983361000 |
| 1 | 3.757723000   | 1.226071000  | -2.980819000 |
| 6 | 4.660309000   | 1.362468000  | -1.093990000 |
| 6 | 4.803065000   | 1.100906000  | 0.271006000  |
| 6 | 5.845163000   | 1.581600000  | 1.052291000  |
| 1 | 5.875649000   | 1.327961000  | 2.105444000  |
| 6 | 6.818890000   | 2.376906000  | 0.449944000  |
| 1 | 7.643153000   | 2.762696000  | 1.040478000  |
| 6 | 6.735615000   | 2.676890000  | -0.908164000 |
| 1 | 7.473272000   | 3.292340000  | -1.409646000 |
| 6 | 5.668441000   | 2.167915000  | -1.637943000 |
| 6 | 1.853989000   | -3.636726000 | -0.729522000 |
| 1 | 1.704867000   | -4.566914000 | -1.293816000 |
| 6 | 2.681566000   | -2.722541000 | -1.609517000 |
| 6 | 3.477518000   | -0.675112000 | -2.159059000 |
| 6 | 3.383788000   | -1.417850000 | -3.325120000 |
| 1 | 3.629244000   | -1.063719000 | -4.317810000 |
| 6 | 2.883949000   | -2.707663000 | -2.977108000 |
| 1 | 2.654282000   | -3.517498000 | -3.655838000 |
| 6 | 2.548903000   | -4.003801000 | 0.592728000  |
| 6 | 1.833221000   | -4.172183000 | 1.782349000  |
| 1 | 0.761866000   | -3.999419000 | 1.791770000  |
| 6 | 2.479059000   | -4.564998000 | 2.955216000  |
| 1 | 1.897602000   | -4.687790000 | 3.865798000  |
| 6 | 3.857554000   | -4.803026000 | 2.981894000  |
| 6 | 4.569504000   | -4.640570000 | 1.785887000  |
| 1 | 5.641200000   | -4.825020000 | 1.771932000  |
| 6 | 3.929412000   | -4.246423000 | 0.613129000  |

|   |             |              |              |
|---|-------------|--------------|--------------|
| 1 | 4.505693000 | -4.126212000 | -0.300002000 |
| 6 | 4.559931000 | -5.195384000 | 4.260118000  |
| 1 | 4.953623000 | -4.315351000 | 4.784270000  |
| 1 | 5.406918000 | -5.860156000 | 4.064125000  |
| 1 | 3.880934000 | -5.706159000 | 4.949205000  |
| 1 | 1.200026000 | 0.440796000  | -3.266036000 |

**12**

|    |              |              |              |
|----|--------------|--------------|--------------|
| 16 | 3.398107000  | 2.771267000  | -0.897174000 |
| 16 | -0.431734000 | 1.403283000  | 0.189648000  |
| 9  | 0.233950000  | -5.024751000 | -1.046243000 |
| 9  | 0.697152000  | -2.935484000 | 3.160576000  |
| 9  | -4.679229000 | -0.781578000 | 1.210203000  |
| 9  | -4.460110000 | -3.114645000 | -2.883333000 |
| 7  | 2.671238000  | -0.843769000 | 0.250249000  |
| 7  | -1.145766000 | -0.774462000 | -2.190191000 |
| 7  | -2.730061000 | 1.317215000  | -1.683232000 |
| 1  | -1.814525000 | 0.975926000  | -1.985717000 |
| 6  | 6.118731000  | 0.500849000  | -0.211262000 |
| 6  | 6.642694000  | 1.789336000  | -0.003426000 |
| 1  | 5.977635000  | 2.600051000  | 0.278095000  |
| 6  | 8.007324000  | 2.037417000  | -0.124078000 |
| 1  | 8.380414000  | 3.044799000  | 0.044054000  |
| 6  | 8.908362000  | 1.015805000  | -0.449753000 |
| 6  | 8.386218000  | -0.267356000 | -0.663447000 |
| 1  | 9.057631000  | -1.077782000 | -0.937314000 |
| 6  | 7.023077000  | -0.522125000 | -0.552331000 |
| 1  | 6.645982000  | -1.517068000 | -0.766733000 |
| 6  | 4.683240000  | 0.237672000  | -0.087893000 |
| 6  | 3.595124000  | 1.129115000  | -0.313574000 |
| 6  | 2.370301000  | 0.493388000  | -0.040340000 |
| 6  | 4.069452000  | -0.957306000 | 0.298779000  |
| 6  | 10.391367000 | 1.281317000  | -0.547436000 |
| 1  | 10.893445000 | 1.094799000  | 0.410564000  |
| 1  | 10.595069000 | 2.320319000  | -0.823033000 |
| 1  | 10.865992000 | 0.634473000  | -1.291747000 |
| 6  | 1.275061000  | 1.394943000  | -0.151064000 |
| 6  | 1.660164000  | 2.632905000  | -0.678136000 |
| 6  | 2.088158000  | -2.101880000 | 0.587318000  |
| 6  | 3.211022000  | -2.914384000 | 1.037645000  |
| 1  | 3.101629000  | -3.936583000 | 1.366543000  |
| 6  | 4.382061000  | -2.254390000 | 0.817889000  |
| 1  | 5.380347000  | -2.628704000 | 0.992799000  |
| 6  | 0.830788000  | -2.615376000 | 0.333619000  |
| 6  | -0.184530000 | -2.076001000 | -0.545864000 |
| 6  | -0.006985000 | -1.168580000 | -1.662294000 |
| 1  | 0.942049000  | -0.830954000 | -2.063091000 |
| 6  | -2.148316000 | -1.440551000 | -1.471107000 |
| 6  | -1.556341000 | -2.322314000 | -0.510389000 |
| 1  | -2.087765000 | -2.930871000 | 0.207577000  |
| 6  | 0.577033000  | 3.500604000  | -0.973971000 |
| 1  | 0.680353000  | 4.455901000  | -1.476384000 |
| 6  | -0.637919000 | 2.976094000  | -0.606102000 |
| 6  | 0.486568000  | -3.899556000 | 1.012939000  |
| 6  | 0.169282000  | -5.063702000 | 0.296939000  |
| 6  | -0.190624000 | -6.260720000 | 0.903168000  |
| 1  | -0.412276000 | -7.121211000 | 0.282556000  |
| 6  | -0.245027000 | -6.317020000 | 2.296085000  |
| 1  | -0.523263000 | -7.243666000 | 2.787545000  |
| 6  | 0.058324000  | -5.191553000 | 3.060798000  |
| 1  | 0.020429000  | -5.203532000 | 4.143920000  |
| 6  | 0.415127000  | -4.016504000 | 2.408632000  |
| 6  | -3.468046000 | -0.967207000 | -1.389648000 |



|   |              |              |              |
|---|--------------|--------------|--------------|
| 6 | -4.524825000 | -1.881643000 | -0.874919000 |
| 6 | -5.104676000 | -1.765018000 | 0.395347000  |
| 6 | -6.081602000 | -2.633565000 | 0.867181000  |
| 1 | -6.479861000 | -2.488745000 | 1.864656000  |
| 6 | -6.508382000 | -3.673940000 | 0.042158000  |
| 1 | -7.271645000 | -4.360338000 | 0.394041000  |
| 6 | -5.960087000 | -3.842459000 | -1.228635000 |
| 1 | -6.272657000 | -4.641912000 | -1.890116000 |
| 6 | -4.980684000 | -2.953523000 | -1.655006000 |
| 6 | -2.006013000 | 3.584055000  | -0.921082000 |
| 1 | -1.847515000 | 4.142606000  | -1.854685000 |
| 6 | -3.064330000 | 2.525836000  | -1.185767000 |
| 6 | -3.772594000 | 0.415654000  | -1.551897000 |
| 6 | -4.876357000 | 1.170001000  | -1.089098000 |
| 1 | -5.861326000 | 0.777691000  | -0.881917000 |
| 6 | -4.431326000 | 2.475696000  | -0.852301000 |
| 1 | -4.999872000 | 3.290204000  | -0.429354000 |
| 6 | -2.490811000 | 4.600134000  | 0.115660000  |
| 6 | -2.947170000 | 5.854666000  | -0.295873000 |
| 1 | -2.945463000 | 6.107503000  | -1.353619000 |
| 6 | -3.408775000 | 6.789826000  | 0.632923000  |
| 1 | -3.757562000 | 7.759418000  | 0.286429000  |
| 6 | -3.425191000 | 6.499634000  | 2.000500000  |
| 6 | -2.968631000 | 5.236839000  | 2.407500000  |
| 1 | -2.972370000 | 4.983037000  | 3.464756000  |
| 6 | -2.508787000 | 4.302272000  | 1.484507000  |
| 1 | -2.154527000 | 3.336172000  | 1.831740000  |
| 6 | -3.894204000 | 7.516783000  | 3.013537000  |
| 1 | -3.045763000 | 7.988642000  | 3.524222000  |
| 1 | -4.517162000 | 7.054379000  | 3.786058000  |
| 1 | -4.476614000 | 8.312884000  | 2.541374000  |

[10]-

|    |              |              |              |
|----|--------------|--------------|--------------|
| 16 | 3.623354000  | 2.710741000  | -0.877843000 |
| 16 | -0.300986000 | 1.255262000  | -0.203520000 |
| 9  | -0.400413000 | -4.891803000 | -0.533499000 |
| 9  | 0.959023000  | -2.440979000 | 3.275507000  |
| 9  | -3.956935000 | -0.399829000 | 1.067742000  |
| 9  | -5.574849000 | -2.572426000 | -2.810914000 |
| 7  | 2.759924000  | -0.942916000 | 0.030611000  |
| 7  | -1.150318000 | -1.159292000 | -2.383899000 |
| 7  | -2.823543000 | 1.405529000  | -0.988818000 |
| 6  | 6.262932000  | 0.273484000  | -0.271502000 |
| 6  | 6.831469000  | 1.548900000  | -0.086361000 |
| 1  | 6.184390000  | 2.394992000  | 0.122461000  |
| 6  | 8.209491000  | 1.739912000  | -0.140234000 |
| 1  | 8.611503000  | 2.740046000  | 0.008304000  |
| 6  | 9.087980000  | 0.674609000  | -0.374208000 |
| 6  | 8.525840000  | -0.594998000 | -0.566898000 |
| 1  | 9.178201000  | -1.441940000 | -0.770923000 |
| 6  | 7.149774000  | -0.793237000 | -0.523340000 |
| 1  | 6.745779000  | -1.781085000 | -0.720633000 |
| 6  | 4.818329000  | 0.067893000  | -0.216630000 |
| 6  | 3.772101000  | 1.013882000  | -0.426767000 |
| 6  | 2.520316000  | 0.408199000  | -0.232298000 |
| 6  | 4.148257000  | -1.123722000 | 0.109827000  |
| 6  | 10.584224000 | 0.879994000  | -0.397414000 |
| 1  | 11.034041000 | 0.695061000  | 0.587397000  |
| 1  | 10.843413000 | 1.904629000  | -0.682704000 |
| 1  | 11.071885000 | 0.200938000  | -1.105015000 |
| 6  | 1.437012000  | 1.318395000  | -0.349904000 |
| 6  | 1.865129000  | 2.597928000  | -0.709204000 |
| 6  | 2.095420000  | -2.103491000 | 0.525466000  |

|   |              |              |              |
|---|--------------|--------------|--------------|
| 6 | 3.165792000  | -2.963446000 | 0.998104000  |
| 1 | 2.992877000  | -3.954230000 | 1.392878000  |
| 6 | 4.378337000  | -2.401512000 | 0.710607000  |
| 1 | 5.350801000  | -2.831201000 | 0.906171000  |
| 6 | 0.766749000  | -2.469975000 | 0.423562000  |
| 6 | -0.214791000 | -1.941756000 | -0.505331000 |
| 6 | 0.032781000  | -1.500783000 | -1.803117000 |
| 1 | 0.960437000  | -1.446928000 | -2.352957000 |
| 6 | -2.191505000 | -1.342360000 | -1.476047000 |
| 6 | -1.638139000 | -1.858440000 | -0.326808000 |
| 1 | -2.170578000 | -2.061216000 | 0.589029000  |
| 6 | 0.801577000  | 3.523232000  | -0.882423000 |
| 1 | 0.925918000  | 4.557966000  | -1.183396000 |
| 6 | -0.433144000 | 2.953653000  | -0.648563000 |
| 6 | 0.306967000  | -3.580108000 | 1.304192000  |
| 6 | -0.301000000 | -4.741912000 | 0.800053000  |
| 6 | -0.783129000 | -5.769113000 | 1.602271000  |
| 1 | -1.233917000 | -6.635541000 | 1.131803000  |
| 6 | -0.664974000 | -5.653911000 | 2.987181000  |
| 1 | -1.038323000 | -6.445080000 | 3.629945000  |
| 6 | -0.068162000 | -4.526214000 | 3.547855000  |
| 1 | 0.032890000  | -4.399494000 | 4.619752000  |
| 6 | 0.400404000  | -3.524114000 | 2.704446000  |
| 6 | -1.278629000 | -0.638644000 | -3.736033000 |
| 1 | -0.279506000 | -0.439962000 | -4.127689000 |
| 1 | -1.860890000 | 0.286581000  | -3.726590000 |
| 1 | -1.774072000 | -1.366223000 | -4.390213000 |
| 6 | -3.581639000 | -0.828052000 | -1.812262000 |
| 1 | -3.819947000 | -1.171871000 | -2.824083000 |
| 6 | -4.683081000 | -1.426202000 | -0.937609000 |
| 6 | -4.858560000 | -1.160922000 | 0.427202000  |
| 6 | -5.916502000 | -1.663388000 | 1.180205000  |
| 1 | -5.972360000 | -1.406757000 | 2.232223000  |
| 6 | -6.867339000 | -2.474610000 | 0.563441000  |
| 1 | -7.699486000 | -2.870874000 | 1.137447000  |
| 6 | -6.745002000 | -2.778347000 | -0.790791000 |
| 1 | -7.458915000 | -3.407391000 | -1.310810000 |
| 6 | -5.665898000 | -2.252767000 | -1.493223000 |
| 6 | -1.799541000 | 3.618101000  | -0.770142000 |
| 1 | -1.649515000 | 4.487331000  | -1.428158000 |
| 6 | -2.766349000 | 2.672568000  | -1.457352000 |
| 6 | -3.565531000 | 0.697398000  | -1.875667000 |
| 6 | -4.030098000 | 1.524803000  | -2.916455000 |
| 1 | -4.651253000 | 1.232891000  | -3.757837000 |
| 6 | -3.505817000 | 2.813696000  | -2.643426000 |
| 1 | -3.633555000 | 3.713075000  | -3.237436000 |
| 6 | -2.319655000 | 4.181416000  | 0.570567000  |
| 6 | -1.456972000 | 4.650941000  | 1.567736000  |
| 1 | -0.383681000 | 4.563107000  | 1.428061000  |
| 6 | -1.953036000 | 5.221530000  | 2.741039000  |
| 1 | -1.255874000 | 5.572910000  | 3.499840000  |
| 6 | -3.328890000 | 5.345073000  | 2.961765000  |
| 6 | -4.190554000 | 4.879260000  | 1.960433000  |
| 1 | -5.267025000 | 4.960360000  | 2.102252000  |
| 6 | -3.697369000 | 4.304944000  | 0.790354000  |
| 1 | -4.377334000 | 3.934529000  | 0.029348000  |
| 6 | -3.867647000 | 5.926800000  | 4.248704000  |
| 1 | -4.079040000 | 5.143754000  | 4.989131000  |
| 1 | -4.803530000 | 6.471612000  | 4.082779000  |
| 1 | -3.152658000 | 6.618520000  | 4.706636000  |

[11-F<sub>a</sub>]-

|    |               |              |              |
|----|---------------|--------------|--------------|
| 16 | -3.699764000  | -2.706820000 | -0.868910000 |
| 16 | 0.183360000   | -1.308786000 | -0.022788000 |
| 9  | 0.474341000   | 4.832875000  | -0.096551000 |
| 9  | -0.949171000  | 1.978416000  | 3.394566000  |
| 9  | 4.101528000   | 0.313940000  | 0.886901000  |
| 9  | 5.408977000   | 2.466133000  | -3.123228000 |
| 7  | -2.810238000  | 0.928555000  | 0.079120000  |
| 7  | 1.061604000   | 1.231552000  | -2.390435000 |
| 7  | 2.998550000   | -1.504503000 | -1.015026000 |
| 1  | 2.957504000   | -1.182569000 | -0.061196000 |
| 6  | -6.324419000  | -0.222806000 | -0.328361000 |
| 6  | -6.921168000  | -1.496200000 | -0.237494000 |
| 1  | -6.297081000  | -2.367293000 | -0.063964000 |
| 6  | -8.301494000  | -1.658659000 | -0.331984000 |
| 1  | -8.722872000  | -2.658960000 | -0.253338000 |
| 6  | -9.157846000  | -0.567402000 | -0.516436000 |
| 6  | -8.569074000  | 0.702838000  | -0.610778000 |
| 1  | -9.202228000  | 1.574419000  | -0.767963000 |
| 6  | -7.192764000  | 0.873704000  | -0.526102000 |
| 1  | -6.770888000  | 1.866280000  | -0.645600000 |
| 6  | -4.882161000  | -0.043994000 | -0.231322000 |
| 6  | -3.846627000  | -1.006181000 | -0.418289000 |
| 6  | -2.593161000  | -0.418326000 | -0.188124000 |
| 6  | -4.192780000  | 1.138130000  | 0.129056000  |
| 6  | -10.654688000 | -0.743128000 | -0.618511000 |
| 1  | -11.184185000 | -0.183870000 | 0.163223000  |
| 1  | -10.938410000 | -1.795472000 | -0.520376000 |
| 1  | -11.041312000 | -0.385640000 | -1.581317000 |
| 6  | -1.525978000  | -1.341530000 | -0.284775000 |
| 6  | -1.945854000  | -2.621685000 | -0.652885000 |
| 6  | -2.125277000  | 2.050319000  | 0.621433000  |
| 6  | -3.171655000  | 2.933392000  | 1.065795000  |
| 1  | -2.979341000  | 3.912280000  | 1.482984000  |
| 6  | -4.401616000  | 2.414520000  | 0.736884000  |
| 1  | -5.363482000  | 2.873025000  | 0.916173000  |
| 6  | -0.761442000  | 2.342132000  | 0.568909000  |
| 6  | 0.187857000   | 1.850331000  | -0.378686000 |
| 6  | -0.068170000  | 1.503106000  | -1.739184000 |
| 1  | -1.024872000  | 1.529053000  | -2.247359000 |
| 6  | 2.097544000   | 1.342976000  | -1.471790000 |
| 6  | 1.619845000   | 1.756523000  | -0.245140000 |
| 1  | 2.182624000   | 1.903700000  | 0.665653000  |
| 6  | -0.884234000  | -3.560399000 | -0.772723000 |
| 1  | -1.005018000  | -4.588486000 | -1.097535000 |
| 6  | 0.339131000   | -3.006936000 | -0.465327000 |
| 6  | -0.269571000  | 3.330934000  | 1.573224000  |
| 6  | 0.362371000   | 4.530255000  | 1.207544000  |
| 6  | 0.855278000   | 5.449556000  | 2.127401000  |
| 1  | 1.322366000   | 6.357518000  | 1.762991000  |
| 6  | 0.726243000   | 5.176435000  | 3.488796000  |
| 1  | 1.107816000   | 5.881909000  | 4.220634000  |
| 6  | 0.108160000   | 4.001511000  | 3.912964000  |
| 1  | -0.002379000  | 3.753849000  | 4.962657000  |
| 6  | -0.373830000  | 3.114138000  | 2.955719000  |
| 6  | 3.449987000   | 0.818362000  | -1.943275000 |
| 1  | 3.554321000   | 1.164606000  | -2.973871000 |
| 6  | 4.659307000   | 1.344630000  | -1.180383000 |
| 6  | 4.954059000   | 1.086677000  | 0.160867000  |
| 6  | 6.071154000   | 1.573440000  | 0.829481000  |
| 1  | 6.211390000   | 1.318203000  | 1.873685000  |
| 6  | 6.971927000   | 2.375551000  | 0.131420000  |
| 1  | 7.851694000   | 2.767748000  | 0.631989000  |
| 6  | 6.739337000   | 2.673485000  | -1.209428000 |

|   |             |              |              |
|---|-------------|--------------|--------------|
| 1 | 7.413679000 | 3.294169000  | -1.788575000 |
| 6 | 5.602435000 | 2.157431000  | -1.822913000 |
| 6 | 1.726482000 | -3.629893000 | -0.593479000 |
| 1 | 1.581279000 | -4.564466000 | -1.153093000 |
| 6 | 2.582934000 | -2.738268000 | -1.467231000 |
| 6 | 3.352154000 | -0.693906000 | -2.070700000 |
| 6 | 3.233087000 | -1.453701000 | -3.220373000 |
| 1 | 3.350647000 | -1.064355000 | -4.220330000 |
| 6 | 2.752198000 | -2.737493000 | -2.840587000 |
| 1 | 2.483440000 | -3.550553000 | -3.502477000 |
| 6 | 2.382683000 | -4.007718000 | 0.745457000  |
| 6 | 1.627994000 | -4.215018000 | 1.905120000  |
| 1 | 0.554530000 | -4.057414000 | 1.873501000  |
| 6 | 2.236707000 | -4.618998000 | 3.093839000  |
| 1 | 1.624557000 | -4.769493000 | 3.980568000  |
| 6 | 3.618123000 | -4.829138000 | 3.168100000  |
| 6 | 4.370501000 | -4.627330000 | 2.003840000  |
| 1 | 5.446826000 | -4.785537000 | 2.028299000  |
| 6 | 3.766053000 | -4.221796000 | 0.815516000  |
| 1 | 4.369374000 | -4.063132000 | -0.073755000 |
| 6 | 4.280789000 | -5.227658000 | 4.466336000  |
| 1 | 4.621866000 | -4.348771000 | 5.028770000  |
| 1 | 5.158446000 | -5.858790000 | 4.291807000  |
| 1 | 3.592212000 | -5.778649000 | 5.114805000  |
| 1 | 1.548582000 | 1.049603000  | -3.857102000 |
| 9 | 2.080854000 | 0.998001000  | -4.693562000 |

[11-F<sub>b</sub>]

|    |               |              |              |
|----|---------------|--------------|--------------|
| 16 | -3.547480000  | -2.797789000 | -0.891623000 |
| 16 | 0.263346000   | -1.263458000 | 0.100057000  |
| 9  | -0.032909000  | 4.952850000  | -0.764136000 |
| 9  | -1.065425000  | 2.675041000  | 3.246959000  |
| 9  | 3.836561000   | 1.116718000  | 0.988028000  |
| 9  | 5.554948000   | 2.290284000  | -3.258796000 |
| 7  | -2.870114000  | 0.861301000  | 0.127377000  |
| 7  | 0.977357000   | 1.050433000  | -2.294255000 |
| 7  | 3.027581000   | -1.269396000 | -1.034397000 |
| 1  | 2.990588000   | -1.158114000 | 0.501265000  |
| 6  | -6.305862000  | -0.502665000 | -0.294143000 |
| 6  | -6.819863000  | -1.804988000 | -0.138305000 |
| 1  | -6.141964000  | -2.620529000 | 0.093413000  |
| 6  | -8.184707000  | -2.059352000 | -0.238873000 |
| 1  | -8.544973000  | -3.077355000 | -0.105399000 |
| 6  | -9.103440000  | -1.033894000 | -0.496413000 |
| 6  | -8.596211000  | 0.263420000  | -0.650720000 |
| 1  | -9.281555000  | 1.083003000  | -0.857939000 |
| 6  | -7.232743000  | 0.525013000  | -0.560589000 |
| 1  | -6.870887000  | 1.535103000  | -0.723715000 |
| 6  | -4.874463000  | -0.232567000 | -0.186276000 |
| 6  | -3.782654000  | -1.129821000 | -0.377215000 |
| 6  | -2.564158000  | -0.476396000 | -0.131612000 |
| 6  | -4.265908000  | 0.981863000  | 0.172827000  |
| 6  | -10.579816000 | -1.320230000 | -0.637327000 |
| 1  | -11.186753000 | -0.467905000 | -0.314366000 |
| 1  | -10.877493000 | -2.189514000 | -0.041958000 |
| 1  | -10.853237000 | -1.534193000 | -1.679317000 |
| 6  | -1.439143000  | -1.335565000 | -0.249213000 |
| 6  | -1.802077000  | -2.614477000 | -0.682544000 |
| 6  | -2.267756000  | 2.076423000  | 0.562407000  |
| 6  | -3.382130000  | 2.896581000  | 1.004522000  |
| 1  | -3.262033000  | 3.907281000  | 1.366477000  |
| 6  | -4.563482000  | 2.264712000  | 0.732682000  |
| 1  | -5.557153000  | 2.652553000  | 0.907356000  |



|   |             |              |              |   |              |              |              |
|---|-------------|--------------|--------------|---|--------------|--------------|--------------|
| 1 | 3.650150000 | 1.018207000  | 3.741436000  | 6 | -0.442584000 | 2.136198000  | -0.652366000 |
| 6 | 2.886161000 | 2.701484000  | 2.459252000  | 6 | -0.687052000 | 1.565349000  | -1.898433000 |
| 1 | 2.691401000 | 3.494403000  | 3.169647000  | 1 | -1.617569000 | 1.330811000  | -2.391966000 |
| 6 | 2.170783000 | 4.097568000  | -1.020073000 | 6 | 1.555672000  | 1.735765000  | -1.676064000 |
| 6 | 1.320858000 | 4.345373000  | -2.103441000 | 6 | 0.986260000  | 2.265368000  | -0.540879000 |
| 1 | 0.254434000 | 4.176392000  | -1.991928000 | 1 | 1.514941000  | 2.643931000  | 0.318534000  |
| 6 | 1.825784000 | 4.805562000  | -3.320097000 | 6 | -0.889033000 | -3.445856000 | -1.023574000 |
| 1 | 1.141014000 | 4.986987000  | -4.145843000 | 1 | -0.945205000 | -4.471438000 | -1.371116000 |
| 6 | 3.194647000 | 5.033836000  | -3.498936000 | 6 | 0.300410000  | -2.790748000 | -0.806861000 |
| 6 | 4.042349000 | 4.791304000  | -2.410401000 | 6 | -1.080186000 | 3.808924000  | 1.094326000  |
| 1 | 5.111603000 | 4.962547000  | -2.516442000 | 6 | -0.680991000 | 5.009701000  | 0.486402000  |
| 6 | 3.541959000 | 4.329191000  | -1.194741000 | 6 | -0.299861000 | 6.141575000  | 1.194154000  |
| 1 | 4.217494000 | 4.139592000  | -0.365571000 | 1 | -0.012472000 | 7.034754000  | 0.651501000  |
| 6 | 3.744205000 | 5.494636000  | -4.828924000 | 6 | -0.307112000 | 6.093095000  | 2.588866000  |
| 1 | 4.034421000 | 4.643980000  | -5.459192000 | 1 | -0.010710000 | 6.966272000  | 3.160526000  |
| 1 | 4.634505000 | 6.118855000  | -4.700424000 | 6 | -0.694268000 | 4.929181000  | 3.251762000  |
| 1 | 3.003564000 | 6.073922000  | -5.389414000 | 1 | -0.702525000 | 4.859510000  | 4.333311000  |
| 1 | 1.370782000 | -1.270755000 | 2.988781000  | 6 | -1.069844000 | 3.823400000  | 2.498038000  |
| 8 | 2.213736000 | -1.302573000 | 4.280539000  | 6 | 2.978243000  | 1.374953000  | -2.101820000 |
| 6 | 2.214478000 | -0.599153000 | 5.353309000  | 1 | 3.135806000  | 1.811358000  | -3.093081000 |
| 8 | 3.131960000 | 0.135598000  | 5.757449000  | 6 | 4.073789000  | 1.963802000  | -1.225800000 |
| 6 | 0.928050000 | -0.701886000 | 6.202075000  | 6 | 4.189992000  | 1.757361000  | 0.151636000  |
| 1 | 1.042183000 | -0.183203000 | 7.157373000  | 6 | 5.225463000  | 2.267953000  | 0.925453000  |
| 1 | 0.089196000 | -0.254996000 | 5.654163000  | 1 | 5.263683000  | 1.996968000  | 1.973053000  |
| 1 | 0.670990000 | -1.752470000 | 6.377268000  | 6 | 6.203203000  | 3.042165000  | 0.304493000  |

**[11-OAc<sub>b</sub>]<sup>-</sup>**

|    |               |              |              |
|----|---------------|--------------|--------------|
| 16 | -3.752640000  | -2.905257000 | -0.836989000 |
| 16 | 0.034211000   | -1.126189000 | -0.282684000 |
| 9  | -0.691012000  | 5.077985000  | -0.861115000 |
| 9  | -1.430568000  | 2.704007000  | 3.157755000  |
| 9  | 3.229497000   | 1.046957000  | 0.771625000  |
| 9  | 5.034781000   | 3.004484000  | -3.123102000 |
| 7  | -3.228465000  | 0.807806000  | 0.087956000  |
| 7  | 0.513706000   | 1.358210000  | -2.505800000 |
| 7  | 2.846858000   | -1.064779000 | -1.336687000 |
| 1  | 3.352988000   | -0.998334000 | -0.430638000 |
| 6  | -6.591225000  | -0.793085000 | -0.063228000 |
| 6  | -7.001164000  | -2.115207000 | 0.193021000  |
| 1  | -6.257812000  | -2.872877000 | 0.421546000  |
| 6  | -8.349790000  | -2.463366000 | 0.197099000  |
| 1  | -8.630773000  | -3.492798000 | 0.406439000  |
| 6  | -9.350154000  | -1.513971000 | -0.050819000 |
| 6  | -8.944027000  | -0.195765000 | -0.303468000 |
| 1  | -9.695047000  | 0.564786000  | -0.504132000 |
| 6  | -7.597971000  | 0.158433000  | -0.317628000 |
| 1  | -7.318321000  | 1.180656000  | -0.552497000 |
| 6  | -5.174659000  | -0.422944000 | -0.067442000 |
| 6  | -4.041301000  | -1.242932000 | -0.342577000 |
| 6  | -2.852674000  | -0.505871000 | -0.203911000 |
| 6  | -4.623565000  | 0.827665000  | 0.238991000  |
| 6  | -10.809339000 | -1.901717000 | -0.076526000 |
| 1  | -11.448848000 | -1.076367000 | 0.251093000  |
| 1  | -11.005610000 | -2.761826000 | 0.570603000  |
| 1  | -11.130849000 | -2.177796000 | -1.088973000 |
| 6  | -1.693389000  | -1.306959000 | -0.407400000 |
| 6  | -2.015316000  | -2.616579000 | -0.776330000 |
| 6  | -2.687920000  | 2.059475000  | 0.511645000  |
| 6  | -3.830765000  | 2.794077000  | 1.035564000  |
| 1  | -3.758305000  | 3.804770000  | 1.409525000  |
| 6  | -4.976802000  | 2.084700000  | 0.830650000  |
| 1  | -5.982828000  | 2.398847000  | 1.069769000  |
| 6  | -1.436359000  | 2.595716000  | 0.306261000  |

|   |              |              |              |
|---|--------------|--------------|--------------|
| 6 | -0.442584000 | 2.136198000  | -0.652366000 |
| 6 | -0.687052000 | 1.565349000  | -1.898433000 |
| 1 | -1.617569000 | 1.330811000  | -2.391966000 |
| 6 | 1.555672000  | 1.735765000  | -1.676064000 |
| 6 | 0.986260000  | 2.265368000  | -0.540879000 |
| 1 | 1.514941000  | 2.643931000  | 0.318534000  |
| 6 | -0.889033000 | -3.445856000 | -1.023574000 |
| 1 | -0.945205000 | -4.471438000 | -1.371116000 |
| 6 | 0.300410000  | -2.790748000 | -0.806861000 |
| 6 | -1.080186000 | 3.808924000  | 1.094326000  |
| 6 | -0.680991000 | 5.009701000  | 0.486402000  |
| 6 | -0.299861000 | 6.141575000  | 1.194154000  |
| 1 | -0.012472000 | 7.034754000  | 0.651501000  |
| 6 | -0.307112000 | 6.093095000  | 2.588866000  |
| 1 | -0.010710000 | 6.966272000  | 3.160526000  |
| 6 | -0.694268000 | 4.929181000  | 3.251762000  |
| 1 | -0.702525000 | 4.859510000  | 4.333311000  |
| 6 | -1.069844000 | 3.823400000  | 2.498038000  |
| 6 | 2.978243000  | 1.374953000  | -2.101820000 |
| 1 | 3.135806000  | 1.811358000  | -3.093081000 |
| 6 | 4.073789000  | 1.963802000  | -1.225800000 |
| 6 | 4.189992000  | 1.757361000  | 0.151636000  |
| 6 | 5.225463000  | 2.267953000  | 0.925453000  |
| 1 | 5.263683000  | 1.996968000  | 1.973053000  |
| 6 | 6.203203000  | 3.042165000  | 0.304493000  |
| 1 | 7.025253000  | 3.444317000  | 0.887971000  |
| 6 | 6.135491000  | 3.299342000  | -1.065979000 |
| 1 | 6.877999000  | 3.900228000  | -1.578443000 |
| 6 | 5.083474000  | 2.752291000  | -1.788314000 |
| 6 | 1.706453000  | -3.320390000 | -1.091297000 |
| 1 | 1.545772000  | -4.150465000 | -1.793841000 |
| 6 | 2.443560000  | -2.265106000 | -1.893907000 |
| 6 | 3.009584000  | -0.130808000 | -2.340173000 |
| 6 | 2.746880000  | -0.753985000 | -3.550500000 |
| 1 | 2.766107000  | -0.274718000 | -4.521746000 |
| 6 | 2.385325000  | -2.100853000 | -3.266254000 |
| 1 | 2.041032000  | -2.844355000 | -3.973563000 |
| 6 | 2.419812000  | -3.932096000 | 0.122617000  |
| 6 | 1.689749000  | -4.546370000 | 1.148181000  |
| 1 | 0.605199000  | -4.500348000 | 1.135584000  |
| 6 | 2.334118000  | -5.223975000 | 2.182763000  |
| 1 | 1.740497000  | -5.691134000 | 2.965429000  |
| 6 | 3.730906000  | -5.312188000 | 2.230634000  |
| 6 | 4.455586000  | -4.691234000 | 1.206432000  |
| 1 | 5.542214000  | -4.730658000 | 1.221671000  |
| 6 | 3.815814000  | -4.008661000 | 0.171963000  |
| 1 | 4.410987000  | -3.500579000 | -0.576935000 |
| 6 | 4.432396000  | -6.018926000 | 3.366685000  |
| 1 | 4.700550000  | -5.316032000 | 4.165161000  |
| 1 | 5.359899000  | -6.493868000 | 3.031391000  |
| 1 | 3.796746000  | -6.790283000 | 3.812473000  |
| 1 | 0.648553000  | 0.803029000  | -3.339520000 |
| 8 | 5.090534000  | -0.615057000 | 2.544890000  |
| 6 | 5.576044000  | -1.083093000 | 1.489346000  |
| 8 | 5.017783000  | -1.192969000 | 0.351514000  |
| 6 | 7.044812000  | -1.575939000 | 1.533335000  |
| 1 | 7.120933000  | -2.590239000 | 1.125345000  |
| 1 | 7.668706000  | -0.933104000 | 0.900334000  |
| 1 | 7.444268000  | -1.562437000 | 2.551381000  |

**[11-TBAF]**

|    |              |              |              |
|----|--------------|--------------|--------------|
| 16 | -4.509503000 | 1.742422000  | -2.503029000 |
| 16 | -2.163573000 | -1.375643000 | -0.914276000 |

|   |              |              |              |   |              |              |              |
|---|--------------|--------------|--------------|---|--------------|--------------|--------------|
| 9 | 0.749793000  | 0.536364000  | 4.156194000  | 6 | -1.892833000 | -3.048836000 | -3.198944000 |
| 9 | -3.713513000 | -1.019800000 | 4.050151000  | 1 | -1.978739000 | -2.925811000 | -4.287202000 |
| 9 | 0.037227000  | -4.578119000 | 0.957377000  | 6 | -0.414211000 | -3.044616000 | -2.874588000 |
| 9 | 4.490170000  | -2.979604000 | 0.880534000  | 6 | 1.282607000  | -2.794300000 | -1.396975000 |
| 7 | -3.103948000 | 1.664205000  | 1.093562000  | 6 | 1.705665000  | -2.284495000 | -2.611012000 |
| 7 | 1.016708000  | -0.208933000 | 0.137176000  | 1 | 2.625858000  | -1.734287000 | -2.742384000 |
| 7 | 0.010285000  | -3.286665000 | -1.586012000 | 6 | 0.640052000  | -2.445137000 | -3.539974000 |
| 1 | -0.539428000 | -3.719967000 | -0.860744000 | 1 | 0.613319000  | -2.096173000 | -4.563839000 |
| 6 | -5.408352000 | 4.332401000  | -0.104536000 | 6 | -2.605664000 | -4.359268000 | -2.828300000 |
| 6 | -6.422442000 | 4.319588000  | -1.080340000 | 6 | -3.923188000 | -4.380107000 | -2.359134000 |
| 1 | -6.576976000 | 3.428172000  | -1.680398000 | 1 | -4.450752000 | -3.443746000 | -2.208094000 |
| 6 | -7.252087000 | 5.421091000  | -1.270910000 | 6 | -4.567011000 | -5.587864000 | -2.087546000 |
| 1 | -8.026168000 | 5.375865000  | -2.033591000 | 1 | -5.591461000 | -5.573553000 | -1.722774000 |
| 6 | -7.116491000 | 6.580955000  | -0.497386000 | 6 | -3.920291000 | -6.814634000 | -2.273669000 |
| 6 | -6.102985000 | 6.598687000  | 0.470426000  | 6 | -2.602961000 | -6.790165000 | -2.750332000 |
| 1 | -5.958994000 | 7.491098000  | 1.075592000  | 1 | -2.074853000 | -7.727409000 | -2.911131000 |
| 6 | -5.263916000 | 5.505378000  | 0.661213000  | 6 | -1.955747000 | -5.586347000 | -3.020571000 |
| 1 | -4.462111000 | 5.567699000  | 1.390367000  | 1 | -0.932452000 | -5.593109000 | -3.385356000 |
| 6 | -4.532670000 | 3.178972000  | 0.100125000  | 6 | -4.606992000 | -8.119409000 | -1.945233000 |
| 6 | -4.180220000 | 2.148900000  | -0.821765000 | 1 | -4.397563000 | -8.432056000 | -0.914283000 |
| 6 | -3.343486000 | 1.208467000  | -0.200475000 | 1 | -4.268980000 | -8.926845000 | -2.602370000 |
| 6 | -3.882593000 | 2.812770000  | 1.288882000  | 1 | -5.693543000 | -8.035705000 | -2.043507000 |
| 6 | -8.041612000 | 7.759823000  | -0.683673000 | 1 | 1.797627000  | 0.057420000  | -0.527051000 |
| 1 | -8.924781000 | 7.682503000  | -0.036220000 | 9 | 3.189301000  | 0.041690000  | -1.177379000 |
| 1 | -8.402454000 | 7.827356000  | -1.714670000 | 7 | 5.404817000  | 2.900484000  | -1.034257000 |
| 1 | -7.543608000 | 8.703104000  | -0.437994000 | 6 | 6.562757000  | 1.886236000  | -0.953555000 |
| 6 | -3.026729000 | 0.119223000  | -1.049925000 | 6 | 6.253842000  | 0.414127000  | -1.251070000 |
| 6 | -3.575799000 | 0.255380000  | -2.327445000 | 1 | 6.983471000  | 1.999466000  | 0.047440000  |
| 6 | -2.596658000 | 1.206340000  | 2.345120000  | 1 | 7.314387000  | 2.239761000  | -1.664813000 |
| 6 | -3.188158000 | 2.101141000  | 3.326886000  | 6 | 7.427699000  | -0.464359000 | -0.788500000 |
| 1 | -2.966168000 | 2.044592000  | 4.382666000  | 1 | 5.310967000  | 0.077748000  | -0.810627000 |
| 6 | -3.907997000 | 3.075469000  | 2.698018000  | 1 | 6.122593000  | 0.285748000  | -2.331189000 |
| 1 | -4.425180000 | 3.900795000  | 3.166372000  | 6 | 7.226667000  | -1.939511000 | -1.148946000 |
| 6 | -1.619440000 | 0.268369000  | 2.598552000  | 1 | 8.365959000  | -0.101445000 | -1.233125000 |
| 6 | -0.623342000 | -0.222832000 | 1.659071000  | 1 | 7.549060000  | -0.368439000 | 0.299093000  |
| 6 | 0.052052000  | 0.548782000  | 0.706287000  | 1 | 8.080074000  | -2.541751000 | -0.821394000 |
| 1 | -0.072696000 | 1.594031000  | 0.462943000  | 1 | 6.326769000  | -2.341768000 | -0.675570000 |
| 6 | 0.988416000  | -1.479439000 | 0.670600000  | 1 | 7.122478000  | -2.070622000 | -2.231501000 |
| 6 | 0.002653000  | -1.517784000 | 1.635339000  | 6 | 4.397047000  | 2.433302000  | -2.098949000 |
| 1 | -0.297549000 | -2.377093000 | 2.216364000  | 6 | 3.167390000  | 3.310777000  | -2.323245000 |
| 6 | -3.272502000 | -0.824526000 | -3.203313000 | 1 | 4.037999000  | 1.434737000  | -1.797886000 |
| 1 | -3.580204000 | -0.879743000 | -4.241770000 | 1 | 4.982983000  | 2.354257000  | -3.020275000 |
| 6 | -2.514060000 | -1.794148000 | -2.589940000 | 6 | 2.258032000  | 2.613143000  | -3.353556000 |
| 6 | -1.488465000 | -0.217769000 | 4.000675000  | 1 | 2.600252000  | 3.418973000  | -1.391735000 |
| 6 | -0.290128000 | -0.108131000 | 4.725137000  | 1 | 3.413095000  | 4.320924000  | -2.675685000 |
| 6 | -0.122571000 | -0.597470000 | 6.013733000  | 6 | 0.945428000  | 3.363984000  | -3.588043000 |
| 1 | 0.832495000  | -0.464992000 | 6.509006000  | 1 | 2.799869000  | 2.513845000  | -4.304097000 |
| 6 | -1.197121000 | -1.235519000 | 6.634354000  | 1 | 2.060748000  | 1.595929000  | -2.997642000 |
| 1 | -1.085633000 | -1.624842000 | 7.641233000  | 1 | 0.324571000  | 2.844739000  | -4.323667000 |
| 6 | -2.413868000 | -1.371789000 | 5.968564000  | 1 | 0.361146000  | 3.441470000  | -2.664905000 |
| 1 | -3.265860000 | -1.866358000 | 6.420721000  | 1 | 1.122258000  | 4.380761000  | -3.958277000 |
| 6 | -2.533639000 | -0.864033000 | 4.679311000  | 1 | 6.326633000  | 4.082905000  | -2.504417000 |
| 6 | 1.868692000  | -2.508252000 | -0.025109000 | 6 | 4.734562000  | 3.105817000  | 0.333898000  |
| 1 | 2.797551000  | -1.978612000 | -0.252132000 | 6 | 4.068621000  | 1.896852000  | 1.006691000  |
| 6 | 2.240780000  | -3.711751000 | 0.828487000  | 1 | 4.008846000  | 3.901058000  | 0.159313000  |
| 6 | 1.355977000  | -4.697721000 | 1.270639000  | 1 | 5.516950000  | 3.514154000  | 0.977187000  |
| 6 | 1.726523000  | -5.800138000 | 2.029925000  | 6 | 4.925174000  | 1.221579000  | 2.091121000  |
| 1 | 0.968901000  | -6.516516000 | 2.325755000  | 1 | 3.160694000  | 2.280817000  | 1.488988000  |
| 6 | 3.066020000  | -5.944330000 | 2.388065000  | 1 | 3.719580000  | 1.162541000  | 0.265867000  |
| 1 | 3.379787000  | -6.797965000 | 2.979809000  | 1 | 5.858069000  | 0.836667000  | 1.658952000  |
| 6 | 4.000544000  | -4.988985000 | 1.992256000  | 1 | 5.222885000  | 1.972019000  | 2.838540000  |
| 1 | 5.048636000  | -5.062400000 | 2.258588000  | 1 | 3.994862000  | -0.745194000 | 2.077819000  |
| 6 | 3.564696000  | -3.909171000 | 1.234666000  | 6 | 4.190211000  | 0.068097000  | 2.781222000  |

|   |             |              |              |   |              |              |              |
|---|-------------|--------------|--------------|---|--------------|--------------|--------------|
| 1 | 4.788625000 | -0.337225000 | 3.604058000  | 6 | 3.288024000  | -2.972012000 | -5.333170000 |
| 1 | 3.227537000 | 0.389144000  | 3.192055000  | 1 | 2.671958000  | -3.150512000 | -6.206942000 |
| 6 | 5.974935000 | 4.244240000  | -1.481358000 | 6 | 4.470692000  | -3.674995000 | -5.103450000 |
| 1 | 5.130841000 | 4.933922000  | -1.529412000 | 1 | 4.793159000  | -4.434392000 | -5.808523000 |
| 6 | 7.094674000 | 4.858004000  | -0.637840000 | 6 | 5.242004000  | -3.404398000 | -3.974373000 |
| 1 | 6.738810000 | 5.096482000  | 0.369860000  | 1 | 6.162434000  | -3.936677000 | -3.763806000 |
| 1 | 7.929856000 | 4.158755000  | -0.524100000 | 6 | 4.810214000  | -2.425400000 | -3.086762000 |
| 6 | 7.610617000 | 6.149295000  | -1.296436000 | 6 | -1.468031000 | -2.391153000 | -0.707543000 |
| 1 | 6.775844000 | 6.849871000  | -1.428669000 | 1 | -2.334918000 | -1.820169000 | -1.048752000 |
| 1 | 7.981667000 | 5.920756000  | -2.304056000 | 6 | -1.659304000 | -3.801431000 | -1.252002000 |
| 6 | 8.719191000 | 6.821914000  | -0.482024000 | 6 | -0.818473000 | -4.884498000 | -0.989223000 |
| 1 | 8.366827000 | 7.096894000  | 0.517940000  | 6 | -1.020838000 | -6.166723000 | -1.481945000 |
| 1 | 9.068575000 | 7.734250000  | -0.973885000 | 1 | -0.314268000 | -6.948529000 | -1.228649000 |
| 1 | 9.581822000 | 6.157899000  | -0.360276000 | 6 | -2.132636000 | -6.402952000 | -2.289779000 |

**[11-TBOAc]**

|    |              |              |              |   |              |              |              |
|----|--------------|--------------|--------------|---|--------------|--------------|--------------|
| 16 | 3.634588000  | 2.740817000  | 2.665911000  | 1 | -3.885927000 | -5.511434000 | -3.215655000 |
| 16 | 2.079804000  | -0.961690000 | 1.408935000  | 6 | -2.755162000 | -4.104055000 | -2.066896000 |
| 9  | 1.766677000  | -1.318217000 | -4.673232000 | 6 | 0.674558000  | -1.794498000 | 3.727928000  |
| 9  | 5.563487000  | -2.193534000 | -1.994740000 | 1 | 0.308215000  | -1.340021000 | 4.658349000  |
| 9  | 0.277375000  | -4.680979000 | -0.209911000 | 6 | -0.539579000 | -1.988249000 | 2.840982000  |
| 9  | -3.625884000 | -3.107439000 | -2.369741000 | 6 | -1.503936000 | -2.259399000 | 0.807521000  |
| 7  | 3.968473000  | 1.283584000  | -0.892877000 | 6 | -2.407246000 | -1.592611000 | 1.616758000  |
| 7  | -0.323614000 | -0.276189000 | -1.305258000 | 1 | -3.378162000 | -1.237235000 | 1.302214000  |
| 7  | -0.407287000 | -2.536191000 | 1.585753000  | 6 | -1.801005000 | -1.421454000 | 2.895709000  |
| 1  | 0.404550000  | -3.022287000 | 1.238300000  | 1 | -2.215607000 | -0.899850000 | 3.748006000  |
| 6  | 5.714738000  | 4.398994000  | 0.155937000  | 6 | 1.383639000  | -3.106743000 | 4.104996000  |
| 6  | 6.186242000  | 4.825220000  | 1.411354000  | 6 | 2.760753000  | -3.151401000 | 4.349654000  |
| 1  | 5.989654000  | 4.220245000  | 2.291223000  | 1 | 3.355057000  | -2.251889000 | 4.223836000  |
| 6  | 6.936412000  | 5.990862000  | 1.539978000  | 6 | 3.377143000  | -4.335028000 | 4.754208000  |
| 1  | 7.291888000  | 6.286790000  | 2.524306000  | 1 | 4.449297000  | -4.340569000 | 4.935993000  |
| 6  | 7.252492000  | 6.782683000  | 0.428672000  | 6 | 2.643455000  | -5.514563000 | 4.927825000  |
| 6  | 6.784891000  | 6.359065000  | -0.822884000 | 6 | 1.264396000  | -5.463778000 | 4.689480000  |
| 1  | 7.008131000  | 6.954466000  | -1.705355000 | 1 | 0.665507000  | -6.362034000 | 4.821321000  |
| 6  | 6.027413000  | 5.200172000  | -0.958889000 | 6 | 0.644416000  | -4.283072000 | 4.283975000  |
| 1  | 5.648751000  | 4.920596000  | -1.937095000 | 1 | -0.426744000 | -4.271415000 | 4.104121000  |
| 6  | 4.930368000  | 3.172817000  | 0.013201000  | 6 | 3.320279000  | -6.803607000 | 5.329916000  |
| 6  | 4.122781000  | 2.510045000  | 0.986880000  | 1 | 3.664212000  | -7.363681000 | 4.451124000  |
| 6  | 3.582256000  | 1.337675000  | 0.439470000  | 1 | 2.640219000  | -7.457208000 | 5.884724000  |
| 6  | 4.847709000  | 2.348253000  | -1.121890000 | 1 | 4.197273000  | -6.616700000 | 5.957123000  |
| 6  | 8.039716000  | 8.062692000  | 0.576866000  | 1 | -1.234561000 | 0.237109000  | -1.307821000 |
| 1  | 8.649258000  | 8.263605000  | -0.309767000 | 8 | -2.826719000 | 0.809984000  | -1.511449000 |
| 1  | 8.706890000  | 8.024032000  | 1.443408000  | 6 | -3.394758000 | 0.869480000  | -2.663915000 |
| 1  | 7.377252000  | 8.926864000  | 0.716200000  | 8 | -4.484949000 | 1.439883000  | -2.893867000 |
| 6  | 2.856619000  | 0.579176000  | 1.384229000  | 6 | -2.705124000 | 0.143662000  | -3.822801000 |
| 6  | 2.778352000  | 1.194795000  | 2.635209000  | 1 | -3.130650000 | 0.458720000  | -4.776943000 |
| 6  | 4.027763000  | 0.356476000  | -1.972209000 | 1 | -1.625494000 | 0.316125000  | -3.817574000 |
| 6  | 5.076905000  | 0.875161000  | -2.835025000 | 1 | -2.861485000 | -0.935072000 | -3.708900000 |
| 1  | 5.342490000  | 0.419011000  | -3.777733000 | 7 | -5.599492000 | 2.398236000  | 0.349858000  |
| 6  | 5.521248000  | 2.076045000  | -2.359471000 | 6 | -5.483621000 | 0.856382000  | 0.242859000  |
| 1  | 6.259550000  | 2.717508000  | -2.819227000 | 6 | -6.555727000 | 0.107955000  | -0.552054000 |
| 6  | 3.164937000  | -0.677679000 | -2.270653000 | 1 | -5.446593000 | 0.498787000  | 1.275141000  |
| 6  | 1.794990000  | -0.813580000 | -1.789107000 | 1 | -4.516594000 | 0.679723000  | -0.238576000 |
| 6  | 0.890457000  | 0.237289000  | -1.620717000 | 6 | -6.318557000 | -1.408197000 | -0.433890000 |
| 1  | 1.033372000  | 1.296663000  | -1.774979000 | 1 | -7.571487000 | 0.335801000  | -0.208431000 |
| 6  | -0.251258000 | -1.654324000 | -1.253993000 | 1 | -6.478487000 | 0.388628000  | -1.605611000 |
| 6  | 1.042953000  | -2.020192000 | -1.568217000 | 6 | -7.352539000 | -2.220563000 | -1.219169000 |
| 1  | 1.440079000  | -3.023937000 | -1.583374000 | 1 | -5.316154000 | -1.650260000 | -0.805407000 |
| 6  | 2.041121000  | 0.443692000  | 3.595768000  | 1 | -6.342298000 | -1.708244000 | 0.622936000  |
| 1  | 1.835356000  | 0.773211000  | 4.608263000  | 1 | -7.158476000 | -3.293610000 | -1.128974000 |
| 6  | 1.586620000  | -0.751695000 | 3.085732000  | 1 | -8.369800000 | -2.033623000 | -0.855944000 |
| 6  | 3.628313000  | -1.686249000 | -3.261386000 | 1 | -7.325865000 | -1.965579000 | -2.283756000 |
| 6  | 2.895353000  | -2.003662000 | -4.417933000 | 6 | -6.249708000 | 2.951776000  | -0.921710000 |





[10]- TBA<sup>+</sup>

Energy = -3932.568036, NImag = 0.0

S, -0.135017, -4.857869, -1.370432  
S, 2.330705, -1.596891, -0.247561  
F, -0.956353, 3.160932, 1.862577  
F, 0.250605, -0.751489, 4.246120  
F, 4.771277, 1.820019, 1.052864  
F, 2.850930, 5.279644, -1.535206  
N, -1.259319, -1.901603, 0.846393  
N, 1.061074, 1.118951, -1.544776  
N, 4.051578, 0.158377, -1.287626  
C, -3.443558, -4.840806, 0.166166  
C, -3.142268, -6.181426, -0.143754  
H, -2.107160, -6.478977, -0.277895  
C, -4.146376, -7.137948, -0.251581  
H, -3.876290, -8.163924, -0.490502  
C, -5.494753, -6.810662, -0.051568  
C, -5.798277, -5.477295, 0.251654  
H, -6.836457, -5.187696, 0.399107  
C, -4.800023, -4.512418, 0.353957  
H, -5.073094, -3.481220, 0.557338  
C, -2.391658, -3.831594, 0.277411  
C, -1.087700, -3.837453, -0.293237  
C, -0.377136, -2.689460, 0.102528  
C, -2.446044, -2.635541, 1.021350  
C, -6.574324, -7.862553, -0.139192  
H, -6.644099, -8.442221, 0.790146  
H, -6.376449, -8.574635, -0.946873  
H, -7.556614, -7.414783, -0.317540  
C, 0.958403, -2.667893, -0.363286  
C, 1.239070, -3.754726, -1.199773  
C, -1.239265, -0.789564, 1.731988  
C, -2.431321, -0.946093, 2.540854  
H, -2.716334, -0.249598, 3.316928  
C, -3.165673, -2.017017, 2.087220  
H, -4.108045, -2.367413, 2.485777  
C, -0.414214, 0.328274, 1.705557  
C, 0.360841, 0.786914, 0.568621  
C, 0.143932, 0.466851, -0.775349  
H, -0.549422, -0.226301, -1.224417  
C, 1.918654, 1.846794, -0.725651  
C, 1.481418, 1.687256, 0.569991  
H, 1.951887, 2.114310, 1.442404  
C, 2.537920, -3.709710, -1.765508  
H, 2.935537, -4.442055, -2.458844  
C, 3.250405, -2.596203, -1.360507  
C, -0.353575, 1.137949, 2.953179  
C, -0.572719, 2.523062, 3.002910  
C, -0.458268, 3.296105, 4.149026  
H, -0.646664, 4.362042, 4.091031  
C, -0.099708, 2.669485, 5.342796  
H, 0.001513, 3.253200, 6.251746  
C, 0.129587, 1.295421, 5.367958  
H, 0.420536, 0.777213, 6.274369  
C, 0.003040, 0.566899, 4.190411  
C, 3.166101, 2.485279, -1.305982  
H, 2.857991, 3.100578, -2.158960  
C, 3.804779, 3.474995, -0.333484  
C, 4.602083, 3.120174, 0.761865  
C, 5.219948, 4.050635, 1.593045  
H, 5.827188, 3.691967, 2.416429  
C, 5.039730, 5.410354, 1.344746  
H, 5.519669, 6.146297, 1.982018

C, 4.238728, 5.825274, 0.281788  
H, 4.068214, 6.872523, 0.059301  
C, 3.645928, 4.852180, -0.513011  
C, 4.646826, -2.168904, -1.810096  
H, 4.848310, -2.738433, -2.726082  
C, 4.645340, -0.690614, -2.155995  
C, 4.060070, 1.386602, -1.870702  
C, 4.688529, 1.335894, -3.127497  
H, 4.826580, 2.156332, -3.824342  
C, 5.069720, -0.014224, -3.314518  
H, 5.586377, -0.436274, -4.169621  
C, 5.712075, -2.592490, -0.784466  
C, 6.311784, -3.852058, -0.878600  
H, 6.027307, -4.521725, -1.687869  
C, 7.275293, -4.264991, 0.043449  
H, 7.731504, -5.247371, -0.059945  
C, 7.666928, -3.430967, 1.095103  
C, 7.064203, -2.167934, 1.184893  
H, 7.356175, -1.495213, 1.989121  
C, 6.105861, -1.750055, 0.264305  
H, 5.658715, -0.763675, 0.339811  
C, 8.697095, -3.873654, 2.108401  
H, 8.243306, -4.053033, 3.091339  
H, 9.474655, -3.114361, 2.250041  
H, 9.188448, -4.801358, 1.799855  
N, -4.237257, 2.237474, -0.766952  
C, -5.062641, 3.513959, -0.966754  
C, -5.026573, 4.198721, -2.335466  
H, -4.730908, 4.205397, -0.190873  
H, -6.096491, 3.235345, -0.744186  
C, -5.817630, 5.517573, -2.277706  
H, -4.002613, 4.410906, -2.650950  
H, -5.474018, 3.554745, -3.099269  
C, -5.870639, 6.226626, -3.633901  
H, -6.839070, 5.317259, -1.927601  
H, -5.361853, 6.182465, -1.532692  
H, -6.434165, 7.161228, -3.564114  
H, -4.865644, 6.469955, -3.994328  
H, -6.355150, 5.601309, -4.391404  
C, -4.321852, 1.378935, -2.030477  
C, -3.704156, -0.017410, -1.971384  
H, -3.846536, 1.955912, -2.823181  
H, -5.388978, 1.309775, -2.263293  
C, -3.860841, -0.719122, -3.333231  
H, -2.641121, 0.043530, -1.723094  
H, -4.175196, -0.635583, -1.201623  
C, -3.290967, -2.140883, -3.325076  
H, -4.924598, -0.750250, -3.606293  
H, -3.361605, -0.123416, -4.109140  
H, -3.412710, -2.611628, -4.304781  
H, -2.223740, -2.145149, -3.083437  
H, -3.795147, -2.769434, -2.584685  
H, -5.829534, 1.085854, -0.000976  
C, -2.781461, 2.532492, -0.369215  
C, -1.895542, 3.364886, -1.308336  
H, -2.330040, 1.555435, -0.204613  
H, -2.839213, 3.020339, 0.600560  
C, -1.798510, 4.861698, -0.968407  
H, -0.894353, 2.935419, -1.202180  
H, -2.159732, 3.217672, -2.362210  
H, -2.774188, 5.355985, -1.068590  
H, -1.513415, 4.950847, 0.086300  
H, -1.005073, 5.501685, -2.902161

C, -0.767111, 5.590875, -1.835563  
H, -0.737833, 6.657424, -1.592786  
H, 0.239895, 5.191074, -1.682083  
C, -4.869622, 1.441097, 0.386387  
H, -4.227063, 0.576163, 0.555349  
C, -5.076263, 2.175446, 1.712112  
H, -4.114203, 2.464661, 2.146925  
H, -5.663788, 3.090266, 1.581400  
C, -5.807481, 1.253332, 2.704938  
H, -5.239095, 0.322079, 2.812170  
H, -6.785866, 0.975772, 2.290820  
C, -5.996071, 1.906351, 4.076835  
H, -5.032330, 2.157178, 4.532436  
H, -6.521246, 1.233154, 4.760216  
H, -6.581562, 2.829523, 4.003319  
C, 1.254382, 0.848031, -2.964699  
H, 0.331886, 0.412595, -3.358045  
H, 1.465023, 1.773743, -3.503530  
H, 2.089612, 0.159911, -3.114671

**[12] TBA<sup>+</sup>**

Energy = -3892.050026, NImag = 0  
S, 4.815218, 0.754643, -1.794704  
S, 1.089721, 1.973214, -0.244359  
F, -1.044998, -2.788590, 3.396961  
F, 1.854700, 0.646357, 4.862839  
F, -2.992081, 3.974945, 1.966494  
F, -4.959911, -0.224098, 1.014189  
N, 3.080624, -0.849934, 1.270600  
N, -1.288366, -0.264789, -0.282231  
N, -1.321077, 2.390579, -1.222237  
C, 6.476318, -1.851456, 0.101207  
C, 7.491502, -1.121952, -0.546171  
H, 7.303258, -0.096065, -0.847225  
C, 8.743519, -1.682919, -0.781808  
H, 9.504239, -1.089078, -1.283559  
C, 9.046562, -2.990076, -0.379681  
C, 8.035652, -3.721085, 0.258847  
H, 8.232344, -4.745577, 0.567554  
C, 6.778786, -3.170879, 0.490323  
H, 6.005910, -3.779089, 0.949612  
C, 5.159125, -1.266059, 0.347613  
C, 4.502798, -0.219374, -0.360981  
C, 3.260267, 0.067452, 0.227701  
C, 4.263873, -1.599485, 1.374458  
C, 10.417671, -3.581432, -0.605087  
H, 11.087093, -3.376719, 0.240645  
H, 10.891946, -3.165161, -1.499368  
H, 10.371016, -4.668684, -0.723194  
C, 2.600447, 1.151409, -0.413546  
C, 3.285563, 1.602880, -1.546882  
C, 2.241764, -1.132359, 2.394545  
C, 3.039835, -2.013053, 3.230858  
H, 2.672837, -2.437784, 4.153584  
C, 4.213897, -2.321779, 2.607207  
H, 4.986107, -2.984090, 2.971573  
C, 0.906460, -0.849992, 2.629119  
C, -0.112316, -0.446212, 1.688065  
C, -0.220871, -0.799154, 0.304548  
H, 0.449981, -1.465441, -0.230401  
C, -1.927665, 0.480420, 0.703820  
C, -1.274402, 0.317814, 1.944981  
H, -1.521342, 0.820678, 2.871107

C, 2.571965, 2.575797, -2.294311  
H, 2.930283, 3.027822, -3.212813  
C, 1.347876, 2.876698, -1.732218  
C, 0.433051, -1.049037, 4.033069  
C, -0.556101, -1.983055, 4.370964  
C, -1.048238, -2.157342, 5.657477  
H, -1.805770, -2.911100, 5.839596  
C, -0.537998, -1.359006, 6.682044  
H, -0.908868, -1.478187, 7.694976  
C, 0.447739, -0.412263, 6.410571  
H, 0.861635, 0.225828, 7.182911  
C, 0.909945, -0.279937, 5.104971  
C, -2.839770, 1.565713, 0.409776  
C, -3.910832, 1.868275, 1.398669  
C, -3.956982, 3.058105, 2.144186  
C, -4.939439, 3.330663, 3.091077  
H, -4.900508, 4.269591, 3.631193  
C, -5.933181, 2.383229, 3.326250  
H, -6.707051, 2.581918, 4.060543  
C, -5.934975, 1.177558, 2.624474  
H, -6.693604, 0.419963, 2.784038  
C, -4.928395, 0.953542, 1.696473  
C, 0.310356, 3.853190, -2.292490  
H, 0.343904, 3.731097, -3.385490  
C, -1.106038, 3.532073, -1.819119  
C, -2.582381, 2.446802, -0.635054  
C, -3.217359, 3.693261, -1.028515  
H, -4.211924, 4.023849, -0.756840  
C, -2.290287, 4.382335, -1.769437  
H, -2.389308, 5.377273, -2.184166  
C, 0.669127, 5.315135, -2.012042  
C, 0.861863, 6.215784, -3.061591  
H, 0.761217, 5.871781, -4.088627  
C, 1.181758, 7.553665, -2.813623  
H, 1.327409, 8.232891, -3.650414  
C, 1.319434, 8.030797, -1.507926  
C, 1.121300, 7.123052, -0.455281  
H, 1.219463, 7.467403, 0.571766  
C, 0.802718, 5.791616, -0.699531  
H, 0.660363, 5.109676, 0.133791  
C, 1.686105, 9.469592, -1.229458  
H, 2.709326, 9.553603, -0.843111  
H, 1.023513, 9.914284, -0.478736  
H, 1.625083, 10.080210, -2.134901  
N, -2.796378, -3.247206, -2.433792  
C, -4.325567, -3.190886, -2.452212  
C, -5.015123, -1.936594, -1.912770  
H, -4.669203, -4.078131, -1.918878  
H, -4.601130, -3.310361, -3.504487  
C, -6.541635, -2.125521, -1.963134  
H, -4.715351, -1.711111, -0.890279  
H, -4.746211, -1.064104, -2.514822  
C, -7.293721, -0.873521, -1.501861  
H, -6.850595, -2.386760, -2.984907  
H, -6.824670, -2.977463, -1.330309  
H, -8.374977, -1.040793, -1.505267  
H, -6.992477, -0.590571, -0.489522  
H, -7.084586, -0.022976, -2.159322  
C, -2.243710, -1.870873, -2.867367  
C, -0.790293, -1.821286, -3.334382  
H, -2.340849, -1.201793, -2.004920  
H, -2.899229, -1.546870, -3.680363  
C, -0.437388, -0.374828, -3.730105

H, -0.111115, -2.137023, -2.535061  
H, -0.611925, -2.475759, -4.195412  
C, 1.000096, -0.258230, -4.242827  
H, -1.133579, -0.040044, -4.512606  
H, -0.587916, 0.279176, -2.864691  
H, 1.227605, 0.773219, -4.524047  
H, 1.721272, -0.544856, -3.471140  
H, 1.169936, -0.893704, -5.120922  
H, -2.534284, -3.834774, -4.442177  
C, -2.192113, -3.666364, -1.074440  
C, -2.774981, -3.121750, 0.233019  
H, -1.146995, -3.369929, -1.154983  
H, -2.231897, -4.757083, -1.058987  
C, -3.943272, -3.912190, 0.843334  
H, -1.938435, -3.164770, 0.940626  
H, -2.986896, -2.053525, 0.162970  
H, -4.838900, -3.861304, 0.211618  
H, -3.668129, -4.975425, 0.896751  
H, -4.643981, -2.365550, 2.199180  
C, -4.299316, -3.402207, 2.244390  
H, -5.092331, -4.007464, 2.695262  
H, -3.426194, -3.430859, 2.902535  
C, -2.361143, -4.290394, -3.463374  
H, -1.283499, -4.403472, -3.337449  
C, -3.037804, -5.662292, -3.405520  
H, -2.973326, -6.096564, -2.401497  
H, -4.102741, -5.582282, -3.646471  
C, -2.372709, -6.624167, -4.405658  
H, -1.308995, -6.728846, -4.156786  
H, -2.410888, -6.187439, -5.412160  
C, -3.035057, -8.004571, -4.421208  
H, -2.983549, -8.481348, -3.436423  
H, -2.541251, -8.667396, -5.137415  
H, -4.091130, -7.936386, -4.703940
